# Supplementary material for: Characteristic, genomics and transcriptomics comparation of phages Kp84B and Kp84S infecting Klebsiella pneumoniae
Source: Research Square preprint supplement (doi:10.21203/rs.3.rs-7611342/v1), 2025-09-30
Supplement: Supplementary file 1 [file 2606a91ceb8fca28e5d3a30b.xlsx]

## Sheet: early
gene id	KpB_0_1_tpm	KpS_0_1_tpm	log2fc	significant	regulate
gene1763	29.05	0.21	-7.22142	yes	down	tdcC
gene1975	228.06	25.51	-3.20443	yes	down	tdcD
gene1976	342.24	28.59	-3.62779	yes	down	pflD
gene1977	404.12	32.53	-3.67143	yes	down	livH
gene1979	4.31	0.42	-3.40539	yes	down
gene2012	1.09	0	-3.58436	yes	down
gene2507	2.93	0	-4.58436	yes	down
gene2884	2.32	0	-3.58436	yes	down
gene2944	3.94	0	-3.80675	yes	down
gene3288	2.75	0	-3.99939	yes	down
gene3852	22.67	2.24	-3.39742	yes	down	entE
gene3853	18.77	1.71	-3.49863	yes	down	fepC
gene3859	23.23	2.87	-3.0774	yes	down
gene3861	26.04	2.51	-3.52295	yes	down	lacI
gene5115	307.6	35.44	-3.16442	yes	down	rbsC
gene5118	104.26	11.84	-3.18962	yes	down	rbsD
gene5120	899.61	118.03	-3.02108	yes	down	pstS
gene5140	148.02	12.75	-3.58497	yes	down
gene631	52.5	1.3	-5.44234	yes	down	dhaT
gene632	226.91	6.12	-5.25914	yes	down
gene633	128.47	1.27	-6.74893	yes	down	dhaB
gene634	36.08	1.14	-5.03078	yes	down	dhbC
gene635	69.51	1.25	-5.86667	yes	down	dhbE
gene636	29.1	0.73	-5.40312	yes	down
gene637	52.53	1.52	-5.14914	yes	down
gene638	55.89	3.33	-4.12492	yes	down
gene722	2.59	0	-4.16932	yes	down
novel0109	11.28	0	-4.13361	yes	down	rhmA
novel0122	297.2	35.39	-3.1895	yes	down
novel0128	78.12	6.99	-3.64325	yes	down
novel0156	0	0	-3.80675	yes	down
novel0201	26.81	0.02	-10.8172	yes	down
novel0275	222.75	0	-3.80675	yes	down
novel0373	378.49	0	-6.41691	yes	down
novel0410	123.86	14.79	-3.12188	yes	down
sRNA0329	339.8	30.76	-3.58436	yes	down
gene1180	2.03	25.68	3.6251	yes	up	acoR
gene1182	0	8.78	7.98952	yes	up
gene1594	1.41	15.64	3.32254	yes	up
gene161	4.89	615.97	6.92992	yes	up	lldD
gene162	5.3	711.64	7.0099	yes	up	lldR
gene163	5.21	381.38	6.15264	yes	up	lldP
gene1655	1.59	36.6	4.44755	yes	up
gene1960	15.28	299.02	4.24613	yes	up	dadA
gene1961	12.23	162.41	3.68822	yes	up	alr
gene2021	1.88	15.91	3.03035	yes	up
gene211	0.37	6.35	4.00061	yes	up
gene2182	2.49	83.45	5.01829	yes	up	afuA
gene2183	1.35	17.4	3.64602	yes	up	afuB
gene2184	1.69	27.26	3.95997	yes	up	afuC
gene2316	7.51	100.33	3.68767	yes	up
gene234	12.1	105.89	3.08424	yes	up	dctA
gene2878	0.96	8.5	3.00061	yes	up
gene3110	2.9	26.57	3.14998	yes	up	astB
gene3111	2.76	29.69	3.38475	yes	up	astD
gene3112	2.2	25.42	3.48104	yes	up	astA
gene3113	1.96	32.76	4.01598	yes	up	astC
gene3240	0.08	57.85	9.41541	yes	up
gene3401	8.79	374.03	5.379	yes	up	putA
gene3424	1.87	29.37	3.92983	yes	up	puuC
gene3425	1.43	19.25	3.70487	yes	up	puuB
gene3685	14.77	262.11	4.11442	yes	up	hutT
gene3686	69.37	1552.41	4.44219	yes	up	hutH
gene3687	88.52	1644.77	4.17549	yes	up	hutU
gene3736	217.72	1942.73	3.12292	yes	up	sucA
gene3737	103.17	1356.33	3.65973	yes	up	sdhB
gene3738	94.6	1281.95	3.72082	yes	up	sdhA
gene3739	32.2	613.19	4.12224	yes	up	sdhD
gene3740	95.11	1156.08	3.53214	yes	up	sdhC
gene3785	15.38	170.31	3.41011	yes	up	gltL
gene3908	1.68	20.04	3.53262	yes	up
gene4173	1.14	12.83	3.44355	yes	up	csiD
gene4197	4.59	56.76	3.59379	yes	up	fadE
gene4301	0	7.57	6.22634	yes	up
gene4401	0	5.13	3.80796	yes	up	oadG
gene4472	2.71	24.9	3.153	yes	up	pobA
gene4507	0.58	6.55	3.39292	yes	up	hpaF
gene4614	0	4.3	4.75656	yes	up
gene4812	11.67	504.82	5.39663	yes	up	acs
gene4814	1.9	50.44	4.64446	yes	up
gene4815	1.96	26.46	3.7153	yes	up	actP
gene4940	3.39	67.25	4.27166	yes	up	fadB
gene4941	3.21	53.66	4.01752	yes	up	fadA
gene5015	41.27	431.18	3.3427	yes	up
gene812	0.39	10.88	4.70105	yes	up
novel0027	0	75.24	3.87835	yes	up
novel0087	0	75.24	3.87835	yes	up
novel0190	33.28	315.77	3.2048	yes	up
novel0194	1.1	21.99	4.17053	yes	up	ttdT
novel0198	0	21.32	7.86417	yes	up
novel0251	50.57	2780.84	5.65882	yes	up	hutU
novel0255	6.9	375.99	5.60547	yes	up
novel0292	0	75.24	3.87835	yes	up
novel0356	0	75.24	3.87835	yes	up
novel0359	9.01	87.04	3.17053	yes	up	dcuB
novel0390	0	75.24	3.87835	yes	up
novel0409	0	75.24	3.87835	yes	up

## Sheet: middle
gene id	KpB_20_2_tpm	KpS_20_2_tpm	log2fc	significant	regulate	KO_name
gene1088	0.66	0.08	-3.05079	yes	down	mdcF
gene1112	0.39	0.04	-3.41336	yes	down	hycC
gene1115	1.37	0.16	-3.05079	yes	down	hycF
gene1336	1.2	0	-4.24344	yes	down
gene1443	1.48	0.12	-3.56536	yes	down	eutL
gene1635	2.97	0.31	-3.24344	yes	down
gene1684	0.52	0	-4.41336	yes	down	dalD
gene2149	0.56	0	-3.8284	yes	down	mhpB
gene2183	0.47	0	-4.70287	yes	down	afuB
gene2196	12.26	0.68	-4.15033	yes	down	ccmH
gene241	1.06	0	-4.41336	yes	down
gene2416	0.56	0	-3.8284	yes	down
gene2446	3.8	0.45	-3.05079	yes	down
gene2577	0.68	0	-4.05079	yes	down
gene2751	101.78	5.37	-4.20265	yes	down	mqo
gene2836	0.75	0	-3.8284	yes	down	paaC
gene2885	1.42	0.12	-3.56536	yes	down	impH
gene2888	2.36	0.22	-3.41336	yes	down
gene3109	1.72	0.07	-4.49136	yes	down	astE
gene3155	2.85	0.26	-3.41336	yes	down	gpx
gene3158	0.41	0	-3.8284	yes	down
gene3700	2.33	0.24	-3.24344	yes	down	ymgA
gene3843	0.91	0.04	-4.3309	yes	down
gene3845	0.87	0	-5.05079	yes	down	hcxA
gene4028	538.94	55.51	-3.23814	yes	down	cyoB
gene4029	745.07	84.82	-3.10351	yes	down	cyoC
gene4030	590.17	70.92	-3.03764	yes	down	cyoD
gene4031	407.37	48.74	-3.02638	yes	down	ctaB
gene4110	0.86	0.1	-3.05079	yes	down	tauB
gene4275	0.71	0	-4.24344	yes	down	gspK
gene4403	0.89	0.05	-4.05079	yes	down	madB
gene498	0.84	0.05	-3.94388	yes	down	exuT
gene815	0.88	0	-4.05079	yes	down
gene816	0.94	0	-4.24344	yes	down
gene825	0.66	0.05	-3.8284	yes	down	betB
novel0195	31.38	2.93	-3.41336	yes	down
sRNA0655	403.35	39.86	-3.3309	yes	down
gene1185	1.2	14.03	3.56392	yes	up
gene12	0.11	35.09	8.36558	yes	up
gene1902	27.19	248.51	3.23292	yes	up	edd
gene2432	0.22	1.82	3.07849	yes	up
gene2929	0.26	2.85	3.457	yes	up
gene2951	0.44	6.34	3.88585	yes	up
gene2955	0	3.58	3.75656	yes	up
gene3022	0	3.28	3.92649	yes	up
gene3036	0	1.71	4.92649	yes	up
gene311	23.99	262.23	3.48288	yes	up	idnK
gene312	8.96	91.98	3.40002	yes	up	gntU
gene3297	0.56	4.41	3.00449	yes	up
gene3525	3.73	42.86	3.56194	yes	up	hcr
gene4149	0.79	6.93	3.14888	yes	up
gene4419	0.33	2.71	3.07849	yes	up
gene4517	1.53	14.1	3.216	yes	up
gene4589	0.79	6.93	3.14888	yes	up
gene994	3.83	30.52	3.02787	yes	up	cobJ
gene999	1.34	16.3	3.61455	yes	up	cbiN
novel0077	0	2.83	6.17307	yes	up
novel0133	3.96	36.6	3.216	yes	up
novel0191	0.91	7.61	3.07849	yes	up
novel0194	11.88	143.3	3.60205	yes	up	ttdT
novel0201	1.54	16.57	3.44716	yes	up
sRNA0177	0	0	3.75656	yes	up
sRNA0320	0	0	3.79219	yes	up

## Sheet: later
Gene_id	Log2FC	KpB_30_1	KpS_40_1	Significant	Regulate	KO_name
gene4928	-3.36465	7160.84	904.06	yes	down	rplK
gene3363	-3.22899	255.48	38.68	yes	down	rne
gene3360	-3.97528	7135.38	604.08	yes	down	------
gene3359	-3.64833	3908.45	385.45	yes	down	rpmF
gene4927	-3.15669	2169.42	329.25	yes	down	rplA
gene4926	-3.03483	4229.99	672.06	yes	down	rplJ
gene4924	-3.63174	725.09	83.1	yes	down	rpoB
gene1533	-3.44247	367.95	47.18	yes	down	ackA
gene192	-5.50662	4405.9	121	yes	down	cspA
gene132	-4.80895	5320.69	234.21	yes	down	rpmB
gene4296	-3.83882	199.9	19.75	yes	down	gcd
gene4314	-3.51351	612.32	75.78	yes	down	aceE
gene4315	-3.35778	761.11	101.31	yes	down	pdhR
gene1546	-3.22742	195.54	29.49	yes	down	nuoG
gene1237	-3.16581	4368.6	572.82	yes	down	rpsP
gene1240	-3.04907	10802.4	1619.86	yes	down	rplS
gene546	-4.3023	3708.96	242.6	yes	down	rpsO
gene406	-3.12257	1853.89	280.23	yes	down	rplE
gene1605	-3.92653	2358.31	192.49	yes	down	rplY
gene410	-3.06859	3428.16	506.1	yes	down	rplR
gene543	-3.12782	291.11	47.08	yes	down	infB
gene1582	-3.26862	192.19	28.18	yes	down	gyrA
gene5043	-3.19945	7874.6	1058.87	yes	down	rpmE
gene4022	-3.28258	694.95	99.64	yes	down	tig
gene395	-3.12185	1730.61	264.6	yes	down	rplD
novel0260	-3.20961	2680.14	392.86	yes	down	------
novel0377	-3.55242	3058.31	323.7	yes	down	------
gene4696	-3.11241	9647.64	1487.86	yes	down	rpsF
novel0284	-4.11584	15663.4	895.34	yes	down	------
gene4414	-3.85417	1770.57	155.13	yes	down	rpsT
novel0358	-3.7303	16465.5	1526.46	yes	down	------
gene394	-3.63698	3219.51	346.68	yes	down	rplC
gene2058	-3.46654	367.42	46.49	yes	down	purU
novel0381	-4.14274	2218.2	150.44	yes	down	------
gene5098	-4.5662	444.13	26.21	yes	down	glnA
gene1717	-4.75546	196.63	10.25	yes	down	etk-wzc
gene457	-4.09864	2037.74	163.5	yes	down	dusB
gene456	-4.16102	2046.61	139.06	yes	down	fis
gene387	-4.06565	1923.9	150.11	yes	down	rpsL
gene397	-3.56427	2341.61	269.9	yes	down	rplB
gene2052	-4.60052	154.63	9.05	yes	down	narG
gene2085	-3.55781	348.73	41.73	yes	down	thrS
gene3789	-3.24038	154.06	23.03	yes	down	leuS
gene2053	-4.42114	216.09	14.1	yes	down	narH
gene1552	-3.97932	228.25	20.23	yes	down	nuoM
gene525	-3.2288	1755.76	232.45	yes	down	------
gene4242	-3.17007	437.88	66.9	yes	down	tsf
gene388	-3.35876	1109.97	139.59	yes	down	rpsG
gene1888	-3.69596	187.55	20.31	yes	down	aspS
gene3480	-3.20694	71.47	11	yes	down	mukB
gene2561	-3.89625	121.55	11.51	yes	down	------
gene4228	-3.30833	86.55	12.39	yes	down	dnaE
gene1543	-3.49529	166.21	20.69	yes	down	nuoCD
gene3723	-3.08492	254.86	41.72	yes	down	tolB
gene1545	-3.43314	187.34	24.23	yes	down	nuoF
gene3722	-3.92843	536.52	46.74	yes	down	pal
gene1720	-4.9501	258.87	11.5	yes	down	------
gene4	-3.10555	117.23	19.22	yes	down	gyrB
gene1724	-5.62026	74.93	2.15	yes	down	------
gene4337	-3.44406	175.87	22.56	yes	down	murC
gene1860	-3.76115	245.82	24.98	yes	down	pgsA
gene1743	-4.09099	199.09	16.18	yes	down	glf
gene3382	-3.78874	144.16	14.59	yes	down	mdoG
gene4392	-3.67033	192.82	21.02	yes	down	carA
gene1615	-3.77404	350.5	34.64	yes	down	mepS
gene3509	-3.00771	55.4	9.79	yes	down	ftsK
gene1742	-4.24262	100.95	7.49	yes	down	------
gene2405	-5.70338	69.61	1.89	yes	down	fdnG
gene3336	-3.38318	1013.37	119.64	yes	down	bhsA
gene1714	-3.4283	132.38	17.19	yes	down	------
gene2090	-3.168	84.38	13.25	yes	down	pheT
gene1824	-3.23698	129.79	19.23	yes	down	------
gene3313	-4.0554	144.87	12.07	yes	down	mnmA
gene1748	-4.29432	95.52	6.81	yes	down	------
gene4930	-3.04771	408.89	65.58	yes	down	secE
gene2969	-4.50449	68.05	4.22	yes	down	------
gene4863	-3.46203	53.89	6.92	yes	down	plsB
gene4695	-3.04593	4898.76	600.97	yes	down	priB
gene1745	-3.39649	78.76	10.52	yes	down	------
gene1716	-4.22039	116.66	8.68	yes	down	wza
gene4677	-3.52491	78.58	9.59	yes	down	tamA
gene1929	-3.58446	453.96	48.69	yes	down	cspA
gene1735	-3.38562	96.66	12.94	yes	down	ugd
gene3808	-3.37172	218.47	28.56	yes	down	pagP
gene4338	-3.85988	119.28	11.36	yes	down	murG
gene4064	-3.20765	119.86	18.01	yes	down	tgt
gene3457	-3.65997	62.99	7.01	yes	down	uup
gene4340	-3.66693	96.19	10.54	yes	down	murD
gene1553	-3.28559	92.12	13.19	yes	down	nuoN
gene2055	-4.41896	189.24	11.87	yes	down	narI
gene3650	-3.5492	82.76	9.86	yes	down	rhlE
gene4335	-3.79143	150.39	14.8	yes	down	ftsQ
gene4339	-3.0855	101.25	16.57	yes	down	ftsW
gene1307	-4.45645	243.33	14.49	yes	down	iscR
gene1308	-3.59139	79.71	9.22	yes	down	iscS
gene1890	-3.03753	193.87	31.91	yes	down	------
gene2187	-4.59255	49.16	2.86	yes	down	------
gene3010	-3.00562	194.71	32.67	yes	down	------
gene5131	-3.62862	718.16	67.99	yes	down	atpE
gene1727	-4.32645	66.26	4.6	yes	down	wcaJ
gene1266	-3.00625	86.47	14.98	yes	down	srmB
gene5129	-3.68293	295.98	29.59	yes	down	atpI
gene2054	-5.27081	128.28	4.48	yes	down	narJ
gene1241	-4.72451	240.92	11.74	yes	down	------
gene3881	-3.26771	69.11	10.02	yes	down	betB
gene1499	-3.92031	88.02	8.02	yes	down	prmB
gene1740	-3.12271	65.64	10.54	yes	down	wzm
gene4065	-3.64717	87.67	9.66	yes	down	queA
gene155	-3.81523	268.2	24.44	yes	down	------
gene5133	-4.52312	182.11	10.41	yes	down	atpH
gene3319	-3.24421	62.15	9.17	yes	down	phoQ
gene4341	-3.80215	82.84	8.2	yes	down	mraY
gene3498	-3.60903	45.17	5.2	yes	down	ycaO
gene1547	-3.68754	90.54	9.66	yes	down	nuoH
gene3511	-3.28773	98.25	13.82	yes	down	trxB
gene4053	-3.1971	294.86	41.06	yes	down	nusB
gene5002	-3.533	31.69	3.87	yes	down	rep
gene1587	-3.41863	82.04	10.59	yes	down	apbE
gene4285	-3.03635	68.92	11.68	yes	down	pcnB
gene1549	-3.19733	187.28	26.94	yes	down	nuoJ
gene2404	-4.97972	125.75	5.31	yes	down	fdnG
gene1541	-3.23502	105.52	15.3	yes	down	nuoA
gene2406	-5.20299	75.27	2.8	yes	down	fdnH
gene1584	-3.25058	70.78	10.3	yes	down	rcsB
gene4336	-3.37842	93.51	12.31	yes	down	ddl
gene3322	-4.92645	50.84	2.32	yes	down	potA
gene4462	-3.11796	137.67	21.34	yes	down	holD
gene3494	-4.37722	97.28	6.33	yes	down	cmk
gene1737	-3.74938	28.89	3.03	yes	down	------
gene3482	-3.70496	50.51	5.39	yes	down	mukF
gene4260	-4.02458	37.24	3.2	yes	down	------
gene187	-3.5906	76.08	8.66	yes	down	glyQ
gene4054	-4.00135	139.53	11.46	yes	down	ribH
gene4990	-3.12867	69.1	10.91	yes	down	rfbB
gene2255	-4.36392	60.85	4.06	yes	down	cynT
gene2751	-4.2139	32.95	2.49	yes	down	mqo
gene3490	-3.35546	36.89	5.05	yes	down	msbA
gene4969	-3.11286	31.06	5.06	yes	down	uvrD
gene2188	-4.71232	39.89	2.12	yes	down	adhB
gene4895	-3.73673	47.41	4.94	yes	down	iclR
gene3639	-3.57251	54.27	6.32	yes	down	glnH
gene4853	-3.31676	40.88	5.74	yes	down	dnaB
gene1706	-3.4932	42.06	5.21	yes	down	yegD
gene1725	-4.64795	71.08	3.85	yes	down	------
gene5100	-3.04366	32.87	5.61	yes	down	glnG
gene1721	-7.19962	42.01	0.4	yes	down	------
gene1146	-3.66848	137.81	14.19	yes	down	csrA
gene4241	-3.31409	80.41	11.02	yes	down	pyrH
gene4245	-3.11456	21.18	3.46	yes	down	glnD
novel0364	-3.85563	406.88	32.51	yes	down	------
gene3066	-4.17128	31.01	2.41	yes	down	rluB
gene3761	-3.3111	131.22	17.41	yes	down	seqA
gene3320	-3.12946	44.54	7.09	yes	down	ycfD
gene1312	-3.17969	30.67	4.75	yes	down	hscA
gene267	-3.04485	28.58	4.87	yes	down	arnA
gene544	-3.24608	144.46	19.82	yes	down	rbfA
gene1556	-4.05198	32.96	2.77	yes	down	menF
gene4987	-3.12736	48.77	7.72	yes	down	wecE
gene1306	-3.00135	62.88	10.77	yes	down	trmJ
gene5108	-3.40045	46.1	6.02	yes	down	------
gene1744	-4.80133	46.15	2.26	yes	down	------
gene4222	-3.04644	90	14.6	yes	down	------
gene3611	-3.54192	30.15	3.61	yes	down	rimO
gene1322	-3.08381	36.49	5.99	yes	down	rlmN
gene1741	-3.20597	72.63	10.64	yes	down	wzt
gene2262	-3.46927	57.84	7.1	yes	down	------
gene1246	-3.21319	40.94	6.1	yes	down	aroF
gene2186	-3.28146	41.84	5.94	yes	down	------
gene1500	-3.67512	37.6	4.06	yes	down	aroC
gene156	-3.44192	148.74	17.28	yes	down	grxC
gene1889	-3.26174	123.37	16.6	yes	down	nudB
gene516	-3.41404	43.15	5.57	yes	down	mlaF
gene326	-3.16734	59.22	8.95	yes	down	------
gene1918	-4.26439	20.08	1.46	yes	down	rsmF
gene4992	-3.18704	34.87	5.31	yes	down	wecB
gene3481	-3.04199	72.86	11.87	yes	down	mukE
gene699	-4.0353	53.2	4.38	yes	down	exbB
gene2037	-3.10089	37.64	6.07	yes	down	chaA
gene1252	-3.16598	33.22	5.14	yes	down	rluD
gene1184	-3.68585	55.68	5.84	yes	down	------
gene1275	-3.33448	55.78	7.49	yes	down	rnc
gene2118	-4.50688	30.4	1.85	yes	down	------
gene3125	-4.194	13.61	1.05	yes	down	qor
gene3395	-5.38382	22.7	0.76	yes	down	efeB
gene2407	-3.194	69.7	10.18	yes	down	fdnI
gene4909	-3.18646	59.62	8.83	yes	down	------
gene863	-3.61185	37.23	4.18	yes	down	fldB
gene1509	-3.60339	27.93	3.19	yes	down	------
novel0102	-3.92192	128.8	10.58	yes	down	------
gene4049	-3.24236	17.73	2.63	yes	down	dxs
gene1722	-4.75878	23.71	1.21	yes	down	------
gene1627	-3.88516	37.62	3.48	yes	down	nfo
gene1764	-4.09124	19.97	1.64	yes	down	sbcB
gene2078	-3.87582	124.75	10.58	yes	down	------
gene1718	-7.32328	17.61	0	yes	down	------
gene3895	-4.33355	24.23	1.66	yes	down	------
gene1713	-3.01712	18.91	3.28	yes	down	------
gene4213	-3.01712	34.16	5.83	yes	down	metN
gene2859	-3.66277	45.87	4.9	yes	down	glpR
gene1276	-3.38162	38.18	5.01	yes	down	era
gene4261	-3.50688	60.94	7.14	yes	down	------
gene423	-3.36392	23.3	3.15	yes	down	rsmB
gene1943	-4.65343	110.47	5.45	yes	down	------
gene5099	-3.06024	31.3	5.19	yes	down	glnL
gene4316	-3.23839	18.74	2.78	yes	down	aroP
gene3937	-3.13544	78.21	11.68	yes	down	ppiB
gene2656	-3.46078	34.86	4.34	yes	down	glsA
gene3857	-3.60581	29.14	3.3	yes	down	fepD
gene4215	-4.23839	34.43	2.48	yes	down	metQ
gene915	-4.23839	20.94	1.54	yes	down	------
gene145	-5.10089	27.82	1.11	yes	down	------
gene4986	-3.06548	25.49	4.23	yes	down	wzxE
gene3333	-4.18268	20.78	1.59	yes	down	lolC_E
gene391	-3.90549	168.94	13.31	yes	down	bfd
gene1242	-3.6965	18.32	1.97	yes	down	------
gene3640	-3.89444	36.22	3.31	yes	down	glnP
gene4212	-3.03835	53.72	8.77	yes	down	gmhB
gene3508	-3.35387	52.13	6.81	yes	down	lolA
gene2270	-3.12	4731.94	435.48	yes	down	------
gene347	-3.01997	40.2	6.75	yes	down	nudE
gene2079	-3.48467	36.06	4.38	yes	down	tonB
gene4052	-4.4794	22.96	1.42	yes	down	thiL
gene1417	-3.33355	13.17	1.84	yes	down	tmcA
gene3975	-7.02473	23.53	0	yes	down	------
gene3548	-3.45273	69.68	8.27	yes	down	------
gene3239	-3.20173	17.97	2.73	yes	down	------
gene3088	-3.59772	33.9	3.81	yes	down	------
gene1588	-3.28146	24.07	3.43	yes	down	ada
gene1560	-3.42006	28.2	3.62	yes	down	menC
gene147	-3.14301	26.43	4.13	yes	down	waaF
gene4375	-5.86642	23.06	0.54	yes	down	rluA
gene4944	-3.38664	33.49	4.36	yes	down	rfaH
gene511	-3.55155	62.45	6.94	yes	down	lptA
gene1726	-5.83785	27.03	0.64	yes	down	------
gene1063	-3.01162	43.93	7.35	yes	down	ispD
novel0213	-6.87601	102.8	0	yes	down	------
gene1561	-3.22742	13.96	2.09	yes	down	menE
gene1559	-3.00135	34.17	5.83	yes	down	menB
gene364	-3.32916	18	2.49	yes	down	tsgA
gene3968	-3.06847	37.02	5.99	yes	down	apt
gene512	-3.69225	47.67	4.88	yes	down	lptC
gene4216	-3.69225	78.19	7.66	yes	down	rcsF
gene3978	-3.3055	95.39	12.05	yes	down	tomB
gene4214	-5.73316	30.71	0.78	yes	down	metI
gene1283	-3.66648	38.19	4.03	yes	down	tadA
gene1309	-3.0353	84.57	13.13	yes	down	iscU
gene670	-3.0353	54.42	8.78	yes	down	ubiK
gene865	-3.65343	34.33	3.68	yes	down	dsbC
gene3338	-4.76385	7.8	0.4	yes	down	------
gene1521	-3.02407	31.42	5.28	yes	down	hisJ
gene1550	-3.64025	134.1	12.77	yes	down	nuoK
gene4430	-3.89444	7.73	0.73	yes	down	thrA
gene3311	-3.13651	45.52	6.91	yes	down	rluE
gene1863	-3.62696	18.09	2.03	yes	down	tyrP
gene1172	-3.12473	39.22	6.05	yes	down	stpA
gene383	-3.00135	33.79	5.74	yes	down	------
gene4950	-3.61354	40.83	4.44	yes	down	ubiJ
gene2302	-3.86642	42.41	3.85	yes	down	rnfA
gene3879	-3.11286	9.93	1.62	yes	down	betT
gene1753	-3.10089	22.9	3.68	yes	down	hisB
gene3801	-3.10089	29.25	4.66	yes	down	lipB
gene3437	-3.10089	45.89	7.12	yes	down	tusE
novel0139	-4.16362	47.73	3.47	yes	down	gumL
gene3797	-3.80871	17.81	1.76	yes	down	rodA
gene139	-5.58631	14.78	0.43	yes	down	------
gene1762	-6.60644	21.31	0	yes	down	------
gene4298	-4.11683	63.47	4.63	yes	down	------
gene521	-3.168	120.07	16.08	yes	down	------
gene1868	-6.56904	52.44	0	yes	down	------
gene1501	-4.60339	22.27	1.25	yes	down	mepA
gene2754	-3.01418	7.51	1.32	yes	down	dcuS
gene65	-4.58631	18.08	1.03	yes	down	murQ
gene5106	-3.74859	21.5	2.19	yes	down	------
gene4768	-3.71756	33.12	3.37	yes	down	------
gene534	-6.4794	19.4	0	yes	down	folP
gene144	-4.53385	12.6	0.76	yes	down	------
gene2458	-3.25289	16.12	2.35	yes	down	zapE
gene2299	-4.51592	15.4	0.93	yes	down	rnfD
gene3712	-3.22374	18.95	2.8	yes	down	galT
gene1857	-3.22374	156.94	19.34	yes	down	------
gene1284	-3.22374	11.33	1.7	yes	down	mltF
gene2296	-5.40345	23.7	0.75	yes	down	------
gene510	-3.05907	30.24	4.91	yes	down	lptB
gene1908	-3.62026	22.88	2.53	yes	down	exoX
gene1591	-3.3478	11.67	1.6	yes	down	mgtE
gene4196	-3.56904	28.85	3.26	yes	down	gmhA
gene4978	-3.89444	23.41	2.13	yes	down	hemD
gene127	-3.31501	17.52	2.42	yes	down	pyrE
novel0085	-4.36392	807.25	36.22	yes	down	------
gene1956	-3.11683	43.88	6.62	yes	down	dsbB
novel0110	-5.95566	45.8	0.94	yes	down	------
sRNA0358	-4.34374	0	0	yes	down
gene3396	-3.85696	13.54	1.29	yes	down	efeO
gene3089	-3.85696	26.96	2.49	yes	down	ispZ
gene1067	-3.10089	27.79	4.37	yes	down	pcm
gene1958	-3.10089	25.45	4.02	yes	down	fadR
gene64	-3.83785	9.48	0.93	yes	down	murP
gene41	-3.08477	12.28	2.02	yes	down	nepI
gene3136	-4.30252	17.29	1.2	yes	down	------
gene2067	-3.81849	6.51	0.65	yes	down	oppA
gene3456	-3.81849	12.1	1.19	yes	down	pqiA
gene789	-3.06847	16.57	2.73	yes	down	mutY
gene3419	-6.17128	217.42	0	yes	down	------
gene4852	-3.77896	11.59	1.17	yes	down	alr
gene4179	-3.0353	32.74	5.32	yes	down	crl
gene1697	-5.14819	8.11	0.32	yes	down	baeS
gene1590	-3.21192	8.91	1.35	yes	down	yojI
gene4286	-3.21192	44.67	6.24	yes	down	folK
gene3633	-4.23839	28.91	2.02	yes	down	mntR
gene4854	-3.75878	11.06	1.14	yes	down	qor
gene4255	-3.01842	10.28	1.78	yes	down	------
gene3618	-3.194	23.39	3.46	yes	down	moeB
gene1694	-3.194	13.72	2.08	yes	down	------
gene4026	-4.194	8.07	0.62	yes	down	ampG
gene5096	-3.71756	25.05	2.54	yes	down	yihX
gene1646	-3.15747	17.56	2.7	yes	down	dusC
gene4146	-3.38382	16.29	2.14	yes	down	parA
gene113	-3.6965	3.93	0.43	yes	down	ligA
gene3435	-3.6965	6.59	0.71	yes	down	oppA
gene1617	-3.13885	13.66	2.15	yes	down	------
gene3074	-4.14819	10.28	0.8	yes	down	trpB
gene3804	-3.10089	51.09	7.55	yes	down	tatE
gene1512	-3.10089	19.21	3.05	yes	down	truA
gene5	-3.32328	15.82	2.17	yes	down	------
gene3634	-3.32328	145.74	16.27	yes	down	------
novel0332	-4.10089	241.21	14.62	yes	down	------
gene4562	-4.10089	9.43	0.76	yes	down	------
gene1947	-3.30252	7.28	1.04	yes	down	fadD
gene1597	-3.30252	10.38	1.46	yes	down	------
novel0037	-4.07664	95.26	6.49	yes	down	------
gene3714	-4.07664	9.21	0.76	yes	down	galM
gene3682	-4.94888	9.12	0.41	yes	down	bioB
gene3324	-5.89444	14.47	0	yes	down	potC
gene1198	-4.05198	10.96	0.91	yes	down	------
novel0202	-5.88832	696.17	0	yes	down	umuD
gene363	-3.04199	6.38	1.09	yes	down	codA
gene5102	-3.04199	28.23	4.55	yes	down	------
gene1502	-3.56323	16.6	1.91	yes	down	------
gene2542	-3.02182	11.2	1.92	yes	down	------
gene1708	-3.02182	23	3.81	yes	down	udk
gene997	-3.23839	20.91	2.98	yes	down	cobI-cbiL
gene1384	-3.00135	128.7	18.21	yes	down	------
gene135	-3.00135	23.2	3.89	yes	down	coaD
gene3718	-3.00135	7.7	1.35	yes	down	czcD
gene1661	-5.77896	8.31	0	yes	down	opuBD
gene3750	-3.49168	7.7	0.96	yes	down	------
gene1519	-3.49168	17.11	2.06	yes	down	ubiX
gene517	-3.94888	14.83	1.3	yes	down	mlaE
gene4763	-4.80871	49.33	2.14	yes	down	cutA
gene220	-3.92192	3.97	0.37	yes	down	bcsB
gene4564	-3.92192	8.64	0.79	yes	down	cfa
gene1754	-3.92192	10.18	0.93	yes	down	hisC
gene2487	-4.77896	5.35	0.27	yes	down	ydaM
gene1201	-3.44192	14.49	1.82	yes	down	------
gene885	-3.44192	5.77	0.75	yes	down	mdtP
gene3042	-3.89444	10.26	0.95	yes	down	sapF
gene2387	-3.89444	8.05	0.75	yes	down	nhoA
gene1311	-3.89444	20.72	1.85	yes	down	hscB
gene1849	-3.89444	14.54	1.33	yes	down	rcsA
novel0057	-5.69065	8.84	0	yes	down	------
gene3124	-3.12473	7.9	1.27	yes	down	gdhA
gene68	-3.12473	3.56	0.58	yes	down	acrB
gene1607	-3.12473	17.6	2.73	yes	down	rsuA
gene3774	-3.86642	12.43	1.16	yes	down	nagD
gene4636	-3.86642	24.66	2.21	yes	down	pyrI
gene1786	-4.71756	4.54	0.24	yes	down	------
gene4900	-4.71756	16.73	0.85	yes	down	yjaB
gene1683	-4.71756	8.18	0.43	yes	down	------
gene2194	-4.71756	4.42	0.24	yes	down	ccmF
gene3075	-3.10089	13.69	2.19	yes	down	trpA
gene1886	-4.68585	11.14	0.59	yes	down	------
gene4290	-4.68585	6.75	0.36	yes	down	------
gene2015	-5.62026	2.4	0	yes	down	impL
gene2033	-3.07664	14.89	2.41	yes	down	hemK
gene3131	-3.36392	23.24	2.98	yes	down	------
gene3932	-3.36392	34.12	4.23	yes	down	uraH
gene2102	-4.65343	29.74	1.5	yes	down	------
gene3006	-3.80871	19.25	1.83	yes	down	sul1
gene79	-3.80871	12.82	1.25	yes	down	metQ
gene2907	-5.58872	7.89	0	yes	down	------
gene1610	-3.05198	6.12	1.04	yes	down	yejF
gene1450	-3.33695	19.2	2.54	yes	down	------
gene1183	-3.33695	10.62	1.45	yes	down	------
gene1755	-4.62026	6.49	0.37	yes	down	hisD
gene446	-3.77896	23.28	2.22	yes	down	------
gene1965	-3.77896	3.65	0.38	yes	down	------
gene4219	-5.55155	8.61	0	yes	down	------
gene344	-3.02689	38.83	6.04	yes	down	hslR
gene1522	-5.51592	13.06	0	yes	down	hisQ
gene3595	-5.51592	8.19	0	yes	down	------
gene1164	-5.51592	3.51	0	yes	down	nrdA
sRNA0129	-5.51592	899.29	0	yes	down
gene2580	-3.00135	11.24	1.93	yes	down	fruR2
gene2722	-3.28146	15.8	2.19	yes	down	------
gene2084	-5.4794	52.07	0	yes	down	------
gene3853	-5.4794	4.65	0	yes	down	entE
gene3397	-3.25289	11.98	1.72	yes	down	efeU
gene4896	-5.44192	4.02	0	yes	down	aceK
gene3332	-5.44192	12.43	0	yes	down	lolD
gene3352	-3.22374	12.44	1.82	yes	down	pabC
gene3538	-3.22374	16.83	2.42	yes	down	artM
gene294	-5.40345	5.72	0	yes	down	livM
gene3805	-5.40345	7.16	0	yes	down	ybeM
gene1523	-5.40345	11.44	0	yes	down	hisM
gene2523	-3.65343	4.96	0.55	yes	down	------
gene4774	-3.194	8.74	1.32	yes	down	------
gene1064	-3.194	26.47	3.74	yes	down	ispF
gene3759	-3.194	9.2	1.39	yes	down	kdpE
gene219	-5.36392	3.18	0	yes	down	bcsA
gene2763	-4.44192	5.49	0.35	yes	down	pcaB
gene759	-4.44192	6.01	0.38	yes	down	------
gene2819	-3.62026	4.88	0.56	yes	down	------
gene1931	-3.16362	10.93	1.67	yes	down	rlmA1
gene3178	-3.16362	9.77	1.5	yes	down	lpxP
gene128	-3.16362	11.46	1.75	yes	down	slmA
gene2290	-3.16362	13.89	2.1	yes	down	pdxH
gene2691	-5.32328	2.02	0	yes	down	lacZ
gene2842	-5.32328	6.52	0	yes	down	panE
gene3558	-4.40345	2.57	0.17	yes	down	------
gene4782	-4.40345	4.59	0.3	yes	down	melB
gene4560	-4.40345	22.32	1.35	yes	down	------
gene5004	-3.58631	18.83	2.06	yes	down	ppiC
gene3072	-3.58631	5.05	0.59	yes	down	trpGD
gene2875	-3.58631	8.05	0.92	yes	down	mexT
gene2301	-3.1326	19.27	2.91	yes	down	rnfB
gene1705	-3.1326	4.22	0.68	yes	down	------
gene2171	-3.1326	13.12	2.03	yes	down	------
gene4094	-5.28146	8.13	0	yes	down	------
gene5142	-4.36392	8.03	0.53	yes	down	pstA
gene3411	-4.36392	4.49	0.3	yes	down	------
gene2620	-3.55155	5.3	0.63	yes	down	hipA
gene244	-3.55155	5.71	0.68	yes	down	------
gene611	-3.10089	2.99	0.49	yes	down	fadH
gene1162	-3.10089	6.69	1.08	yes	down	proV
gene438	-3.10089	9.9	1.58	yes	down	------
gene193	-4.32328	22.19	1.42	yes	down	------
gene4670	-4.32328	4.09	0.29	yes	down	ytfR
gene4056	-4.32328	20.48	1.32	yes	down	nrdR
gene3856	-4.32328	5.59	0.39	yes	down	entS
gene879	-4.32328	34.09	2.08	yes	down	------
gene2137	-3.51592	12.07	1.43	yes	down	fumD
gene2038	-3.51592	15.72	1.83	yes	down	chaB
gene3744	-3.51592	8.23	0.99	yes	down	------
gene700	-3.51592	26.03	2.9	yes	down	exbD
gene2761	-3.06945	9.49	1.55	yes	down	pcaC
gene223	-3.06847	8.28	1.36	yes	down	bcsZ
gene5115	-3.06847	7.57	1.25	yes	down	lacI
gene339	-3.06847	14.78	2.37	yes	down	greB
gene3387	-5.194	13.57	0	yes	down	------
gene3612	-3.0609	5.02	0.84	yes	down	gsiD
gene3389	-3.4794	8.03	0.99	yes	down	ghrA
gene1470	-3.4794	6.9	0.86	yes	down	------
gene2191	-4.28146	10.26	0.71	yes	down	ccmC
gene5012	-4.28146	3.82	0.28	yes	down	comM
gene182	-4.28146	4.53	0.33	yes	down	xylB
gene209	-5.16347	13.42	0	yes	down	------
gene4999	-3.0353	9.3	1.56	yes	down	------
gene2981	-3.0353	5.18	0.88	yes	down	------
gene4733	-3.0353	5.31	0.91	yes	down	------
gene2123	-3.44192	2.23	0.29	yes	down	------
gene4771	-3.44192	3.51	0.45	yes	down	pgaB
gene1894	-4.23839	7.84	0.57	yes	down	znuB
gene3254	-4.23839	9.47	0.68	yes	down	------
gene1558	-3.00135	12.22	2.07	yes	down	menH
gene1612	-5.10089	5.5	0	yes	down	yejB
gene1125	-5.10089	4.57	0	yes	down	hoxN
gene4818	-5.10089	2.5	0	yes	down	fimD
gene4780	-3.40306	10.48	1.34	yes	down	------
novel0236	-3.40345	47.39	5.29	yes	down	------
novel0343	-4.194	181.37	9.93	yes	down	------
gene1503	-4.194	14.46	1.04	yes	down	epmC
gene261	-4.194	7.07	0.53	yes	down	nikB
gene3763	-4.194	20.29	1.42	yes	down	------
gene3659	-4.194	5.75	0.43	yes	down	ybhS
gene4870	-4.194	3.67	0.28	yes	down	malF
gene881	-5.05198	4.23	0	yes	down	arsB
gene853	-4.14819	2.89	0.23	yes	down	scsB
gene4465	-4.14819	5.12	0.4	yes	down	------
gene2046	-4.14819	1.36	0.11	yes	down	nirB
gene1651	-3.32328	3.97	0.56	yes	down	------
gene3749	-3.32328	12.17	1.63	yes	down	pxpB
gene3706	-4.10089	9.89	0.77	yes	down	modB
gene4161	-4.10089	3.75	0.31	yes	down	aceF
gene1392	-4.10089	3.07	0.25	yes	down	------
gene684	-4.10089	4.08	0.33	yes	down	qseC
gene78	-4.94888	5.32	0	yes	down	mtrA
gene1787	-4.94888	4.39	0	yes	down	------
gene2101	-4.94888	3.29	0	yes	down	selO
gene3584	-4.94888	6.03	0	yes	down	------
gene1374	-4.94888	2.66	0	yes	down	------
gene3613	-3.28146	6.94	0.98	yes	down	gsiC
gene164	-3.28146	27.67	3.54	yes	down	yibL
gene1085	-4.05198	2.26	0.19	yes	down	tbpA
gene1920	-4.05198	4.02	0.34	yes	down	pqiA
gene2166	-4.05198	6.39	0.53	yes	down	------
gene1217	-4.05198	2.79	0.24	yes	down	------
gene4039	-4.05198	4.16	0.35	yes	down	pcaK
gene3877	-4.89444	3.56	0	yes	down	ybdG
gene1949	-4.89444	40	0	yes	down	minE
gene3007	-4.89444	13.05	0	yes	down	ebr
gene92	-3.23839	4.12	0.61	yes	down	celF
gene272	-3.23839	3.78	0.56	yes	down	------
gene2312	-3.23839	15.11	2.1	yes	down	cybB
gene3009	-4.00135	8.01	0.68	yes	down	------
gene2209	-4.83785	2.78	0	yes	down	ilvB
gene4015	-4.83785	6.62	0	yes	down	tesC
gene2693	-4.83785	3.28	0	yes	down	------
gene4742	-4.83785	27.79	0	yes	down	ecnA
gene2117	-4.83785	4.93	0	yes	down	------
gene4772	-4.83785	3.76	0	yes	down	pgaC
gene1793	-3.94888	14.21	1.2	yes	down	------
gene3186	-3.94888	5.66	0.5	yes	down	------
gene4139	-3.94888	7.27	0.64	yes	down	------
gene3525	-3.94888	4.6	0.41	yes	down	hcr
gene4472	-3.94888	4.45	0.4	yes	down	pobA
gene1631	-4.78914	8.79	0	yes	down	------
gene4792	-4.77896	4.59	0	yes	down	phnI
gene1984	-4.77896	2.69	0	yes	down	pckA
gene3644	-3.14819	7.02	1.08	yes	down	------
gene9	-3.14819	7.49	1.15	yes	down	dgoK
gene731	-3.14819	5.36	0.84	yes	down	------
gene208	-3.89444	3.52	0.33	yes	down	------
gene3855	-4.71756	4.27	0	yes	down	fepB
gene825	-4.71756	3.03	0	yes	down	betB
gene4355	-4.71756	8.88	0	yes	down	leuD
gene169	-4.71756	3.76	0	yes	down	------
gene1825	-4.71756	2.86	0	yes	down	------
gene2762	-4.71756	6.69	0	yes	down	pcaD
gene3585	-3.10089	10.36	1.62	yes	down	------
gene4639	-3.10089	4.82	0.78	yes	down	treR
gene1775	-3.10089	6.53	1.05	yes	down	------
gene179	-3.83785	3	0.29	yes	down	xylG
gene3077	-3.83785	4.59	0.44	yes	down	ttuC
gene2138	-3.83785	6.21	0.59	yes	down	------
gene3242	-3.83785	3.3	0.32	yes	down	------
gene3586	-4.65343	7.05	0	yes	down	------
gene3149	-4.65343	94.49	0	yes	down	------
gene1575	-4.64686	3.62	0	yes	down	------
gene1012	-3.05198	20.15	3.07	yes	down	------
gene5123	-3.05198	3.54	0.6	yes	down	------
gene4345	-3.05198	24.98	3.73	yes	down	ftsL
gene2345	-3.05198	27.79	4.1	yes	down	------
gene3439	-3.05198	7.42	1.22	yes	down	------
gene1663	-3.05198	8.45	1.38	yes	down	opuBD
gene2366	-3.05198	10.87	1.75	yes	down	------
gene242	-3.05198	6.07	1.01	yes	down	------
gene50	-4.62829	3.14	0	yes	down	lamB
gene1946	-3.77896	9.91	0.96	yes	down	slp
gene5061	-3.77896	3.17	0.32	yes	down	rhaB
gene2293	-3.77896	4.95	0.5	yes	down	gst
gene2131	-3.77896	4.38	0.44	yes	down	sufD
gene1243	-3.77896	6.84	0.68	yes	down	------
gene1611	-3.77896	4.8	0.48	yes	down	yejE
gene3755	-4.58631	2.03	0	yes	down	kdpA
gene3942	-4.58631	3.83	0	yes	down	selU
gene21	-4.58631	2.39	0	yes	down	glvC
gene4570	-4.58631	3.13	0	yes	down	xylA
gene89	-4.58631	2.94	0	yes	down	------
gene4370	-4.58631	2.34	0	yes	down	araB
gene2598	-3.00135	5.95	1.02	yes	down	------
gene34	-3.00135	17.95	2.86	yes	down	ilvH
gene472	-3.00135	15.01	2.43	yes	down	mreD
gene349	-3.00135	7.17	1.22	yes	down	hofM
gene309	-3.00135	7.04	1.2	yes	down	------
gene2503	-3.00135	3.44	0.6	yes	down	emrB
gene1418	-3.00135	5.41	0.93	yes	down	------
gene1677	-3.71756	6.16	0.64	yes	down	thiD
gene3683	-3.71756	3.46	0.37	yes	down	bioA
gene826	-3.71756	2.64	0.28	yes	down	ilvB
gene1425	-3.71756	3.11	0.33	yes	down	------
gene692	-3.71756	8.48	0.86	yes	down	------
gene3546	-4.51592	3.39	0	yes	down	potG
gene4147	-4.51592	13.31	0	yes	down	------
gene4356	-4.51592	1.84	0	yes	down	fadH
gene4563	-4.51592	6.19	0	yes	down	------
gene4268	-4.51592	1.9	0	yes	down	gspD
gene1440	-4.51592	2.78	0	yes	down	eutA
gene1141	-4.51592	4.51	0	yes	down	------
gene2840	-4.51592	1.63	0	yes	down	tynA
gene4898	-4.51592	2.31	0	yes	down	aceB
gene1773	-4.51592	5	0	yes	down	------
gene1647	-4.51592	2.71	0	yes	down	oprB
gene3946	-4.51592	6.97	0	yes	down	tesA
gene4669	-3.65343	4.4	0.48	yes	down	ytfT
gene3601	-3.65343	4.99	0.54	yes	down	ybjI
gene4773	-3.65343	4.81	0.53	yes	down	pgaD
gene4539	-3.65343	4.94	0.54	yes	down	------
gene3663	-3.65343	3.51	0.39	yes	down	clsA_B
gene5153	-3.65343	3.72	0.41	yes	down	mdtL
gene2316	-3.65343	4.61	0.5	yes	down	------
gene55	-3.65343	3.09	0.34	yes	down	pcaK
gene2545	-4.44192	7.47	0	yes	down	------
gene1082	-4.44192	3.94	0	yes	down	hmuU
gene2527	-4.44192	6.78	0	yes	down	------
gene1112	-4.44192	1.96	0	yes	down	hycC
gene2120	-4.44192	3.23	0	yes	down	------
gene2845	-4.44192	9.29	0	yes	down	------
gene4498	-3.58631	2.82	0.33	yes	down	------
gene3084	-3.58631	1.7	0.2	yes	down	fiu
gene5065	-3.58631	2.68	0.31	yes	down	rhaT
gene1424	-3.58631	5.84	0.66	yes	down	nudK
gene3859	-3.58631	5.96	0.67	yes	down	fepC
gene1452	-3.58631	4.02	0.46	yes	down	cysP
gene662	-3.58631	8.71	0.96	yes	down	folB
gene1419	-3.58631	36.6	3.47	yes	down	------
gene4611	-3.31606	17.85	2.24	yes	down	------
novel0300	-4.36392	420.66	0	yes	down	pcnB
gene2717	-4.36392	2.7	0	yes	down	------
gene5062	-4.36392	2.83	0	yes	down	rhaA
gene3049	-4.36392	5.2	0	yes	down	------
gene2388	-4.36392	3.25	0	yes	down	narI
gene4206	-4.36392	4.41	0	yes	down	------
gene3852	-4.36392	4.5	0	yes	down	entB
gene301	-4.36392	4.56	0	yes	down	ugpE
gene1394	-4.36392	2.9	0	yes	down	------
gene2826	-4.36392	7.12	0	yes	down	paaY
gene5067	-4.36392	3.69	0	yes	down	rhaQ
gene4806	-4.36392	5.06	0	yes	down	------
gene3912	-3.51592	3.27	0.4	yes	down	------
gene1094	-3.51592	3.7	0.45	yes	down	sitA
gene2474	-3.51592	2.65	0.32	yes	down	------
gene7	-3.51592	3.55	0.43	yes	down	------
gene1295	-3.51592	2.56	0.31	yes	down	xylE
gene2524	-3.51592	2.8	0.34	yes	down	------
gene1686	-3.51592	3.09	0.38	yes	down	------
gene899	-3.51592	48.32	4.64	yes	down	------
gene431	-3.51592	4.24	0.51	yes	down	------
gene1092	-4.28146	4.2	0	yes	down	sitC
gene1093	-4.28146	4.47	0	yes	down	sitB
gene52	-4.28146	2.53	0	yes	down	celB
gene1086	-4.28146	6.07	0	yes	down	------
gene4120	-4.28146	3.31	0	yes	down	livM
gene2617	-4.28146	1.25	0	yes	down	fimD
gene2947	-4.28146	4.66	0	yes	down	------
gene1061	-4.28146	10.12	0	yes	down	------
gene2795	-4.28146	2.85	0	yes	down	patB
gene3680	-4.28146	2.05	0	yes	down	bioC
gene300	-4.28146	3.53	0	yes	down	ugpA
gene4385	-4.28146	13.71	0	yes	down	apaG
gene1719	-4.28146	15.71	0	yes	down	gumL
gene2829	-4.28146	2.77	0	yes	down	paaJ
gene3841	-4.28146	3.15	0	yes	down	------
gene742	-4.28146	7.89	0	yes	down	------
novel0137	-4.28146	20.51	0	yes	down	------
novel0129	-4.28146	23.19	0	yes	down	------
gene1763	-4.25318	7.19	0	yes	down	------
gene1397	-3.44192	1.58	0.2	yes	down	------
gene4882	-3.44192	3.54	0.45	yes	down	------
gene4783	-3.44192	2.74	0.35	yes	down	melA
gene4605	-3.44192	3.99	0.5	yes	down	iolE
gene4490	-3.44192	2.37	0.31	yes	down	lgoT
gene3876	-3.44192	3.84	0.49	yes	down	gcvA
gene2428	-3.44192	5.23	0.65	yes	down	------
gene678	-3.44192	12.79	1.49	yes	down	------
gene2233	-3.44192	4.25	0.54	yes	down	------
gene1478	-3.44192	14.09	1.63	yes	down	------
gene1871	-4.23926	3.09	0	yes	down	------
gene1746	-4.23926	3.09	0	yes	down	------
gene2203	-4.23926	3.09	0	yes	down	------
gene4115	-4.194	2.27	0	yes	down	eat
gene2738	-4.194	8.2	0	yes	down	mdtI
gene3996	-4.194	3.53	0	yes	down	rcnA
gene3365	-4.194	2.62	0	yes	down	------
gene4276	-4.194	2.76	0	yes	down	gspL
gene4279	-4.194	4.35	0	yes	down	gspO
gene1874	-4.194	2.95	0	yes	down	araH
gene3277	-4.194	1.51	0	yes	down	------
gene4208	-4.194	2.68	0	yes	down	ydhP
gene2567	-4.194	3.59	0	yes	down	------
gene2368	-4.194	3.24	0	yes	down	------
gene4878	-4.194	7.61	0	yes	down	------
gene2613	-4.194	4.21	0	yes	down	map
gene2512	-4.194	4.08	0	yes	down	------
gene4868	-4.194	2.6	0	yes	down	malK
gene241	-4.194	4.41	0	yes	down	------
gene4536	-4.194	3.69	0	yes	down	------
gene2195	-4.194	6.96	0	yes	down	ccmG
novel0272	-4.194	15.25	0	yes	down	------
gene3157	-4.194	3.49	0	yes	down	------
gene4571	-4.194	2.13	0	yes	down	------
gene1819	-4.194	3.31	0	yes	down	ybtA
gene2435	-4.194	1.7	0	yes	down	------
gene715	-3.36392	2.77	0.37	yes	down	------
gene1133	-3.36392	5.06	0.67	yes	down	srlD
gene4035	-3.36392	2.05	0.28	yes	down	------
gene4802	-3.36392	3.64	0.49	yes	down	rbsC
gene4538	-3.36392	2.5	0.34	yes	down	------
gene4777	-3.36392	21.44	2.48	yes	down	cbpM
gene2520	-3.36392	4.19	0.56	yes	down	------
gene567	-3.36392	3.5	0.47	yes	down	gatD
gene3097	-3.36392	17.44	2.07	yes	down	cedA
gene2133	-3.36392	10.46	1.31	yes	down	sufE
gene3085	-3.36392	2.88	0.39	yes	down	------
gene2624	-3.36392	2.21	0.3	yes	down	xanP
gene3203	-4.10089	3.76	0	yes	down	------
gene4807	-4.10089	3.54	0	yes	down	------
gene4204	-4.10089	3.29	0	yes	down	gloB
gene2902	-4.10089	1.67	0	yes	down	------
gene1029	-4.10089	2.08	0	yes	down	------
gene4797	-4.10089	6.28	0	yes	down	phnN
gene460	-4.10089	12.98	0	yes	down	------
gene3897	-4.10089	4.09	0	yes	down	------
gene754	-4.10089	2.1	0	yes	down	------
gene2148	-4.10089	1.76	0	yes	down	mhpA
gene4275	-4.10089	3.15	0	yes	down	gspK
gene58	-4.10089	4.5	0	yes	down	galB
gene638	-4.10089	4.05	0	yes	down	------
gene3380	-4.10089	11.03	0	yes	down	------
gene93	-4.10089	1.78	0	yes	down	glvC
gene4652	-4.10089	4.04	0	yes	down	------
gene1814	-4.10089	1.82	0	yes	down	irp5
gene1016	-4.10089	1.89	0	yes	down	fucK
gene1691	-4.10089	3.44	0	yes	down	------
gene3953	-3.28146	4.39	0.61	yes	down	cueR
gene3756	-3.28146	1.55	0.22	yes	down	kdpB
gene2145	-3.28146	2.1	0.3	yes	down	------
gene4112	-3.28146	3.87	0.55	yes	down	mmuM
gene3543	-3.28146	7.89	1.06	yes	down	------
gene3815	-3.28146	4.16	0.58	yes	down	dsbG
gene3836	-3.28146	2.45	0.35	yes	down	uhpC
gene3913	-3.28146	2.88	0.41	yes	down	------
gene10	-3.28146	10.82	1.42	yes	down	dgoA
gene1219	-3.28146	3.22	0.46	yes	down	------
gene617	-3.28146	3.5	0.49	yes	down	lsrB
sRNA0485	-3.28146	0	369.86	yes	down
gene2198	-3.28146	5.19	0.72	yes	down	------
novel0379	-3.28146	33.05	3.83	yes	down	hdfR
gene22	-3.28146	2.52	0.36	yes	down	glvA
gene302	-3.28146	3.23	0.46	yes	down	ugpC
gene2687	-3.28146	3.08	0.44	yes	down	ftrA
gene2068	-3.28146	3.44	0.49	yes	down	oppB
gene2603	-3.28146	2.51	0.36	yes	down	glvA
gene2392	-3.28146	2.19	0.31	yes	down	narK
gene288	-3.28146	2.79	0.4	yes	down	------
gene5063	-4.00135	3.51	0	yes	down	rhaD
gene2718	-4.00135	12.24	0	yes	down	------
gene2169	-4.00135	3.01	0	yes	down	------
gene1370	-4.00135	1.04	0	yes	down	------
gene3570	-4.00135	4.25	0	yes	down	------
gene2426	-4.00135	3.52	0	yes	down	------
gene2167	-4.00135	2.8	0	yes	down	------
gene4310	-4.00135	3.99	0	yes	down	------
gene587	-4.00135	4.45	0	yes	down	------
gene2786	-4.00135	1.92	0	yes	down	rstB
gene1998	-4.00135	1.57	0	yes	down	------
gene3745	-4.00135	4.25	0	yes	down	------
gene3199	-4.00135	3.37	0	yes	down	------
gene320	-4.00135	6.16	0	yes	down	------
gene800	-4.00135	7.75	0	yes	down	ruvX
gene3974	-3.9785	4.91	0	yes	down	acrR
gene4301	-3.97431	7.25	0	yes	down	------
gene1994	-3.194	13.45	1.82	yes	down	------
gene3833	-3.194	2.56	0.39	yes	down	codA
gene2330	-3.194	2.75	0.42	yes	down	benE
gene4177	-3.194	2.02	0.31	yes	down	gabP
gene2323	-3.194	2.28	0.35	yes	down	------
gene2246	-3.194	3.42	0.51	yes	down	ddpF
gene2866	-3.194	2.57	0.39	yes	down	tyrB
gene4074	-3.194	1.61	0.25	yes	down	------
gene2473	-3.194	2.33	0.35	yes	down	------
gene2682	-3.194	3.03	0.46	yes	down	urtC
gene1867	-3.194	2.1	0.32	yes	down	------
gene2475	-3.194	3.68	0.55	yes	down	------
sRNA0505	-3.194	498.1	43.55	yes	down
gene1441	-3.194	2.28	0.35	yes	down	eutB
gene912	-3.194	6.53	0.95	yes	down	uhpA
gene2197	-3.89444	3.02	0	yes	down	------
gene862	-3.89444	11.14	0	yes	down	cptA
gene4915	-3.89444	4.78	0	yes	down	thiE
gene4023	-3.89444	33.26	0	yes	down	------
gene2685	-3.89444	2.13	0	yes	down	metE
gene1024	-3.89444	1.81	0	yes	down	------
gene2409	-3.89444	3.33	0	yes	down	ppk2
gene2518	-3.89444	1.94	0	yes	down	allC
gene4789	-3.89444	3.96	0	yes	down	phnF
gene3417	-3.89444	3.55	0	yes	down	------
gene1570	-3.89444	1.99	0	yes	down	------
gene1979	-3.89444	2.95	0	yes	down	livH
gene14	-3.89444	1.98	0	yes	down	dgoT
gene1433	-3.89444	2.79	0	yes	down	eutD
gene1976	-3.89444	2.14	0	yes	down	tdcD
gene1018	-3.89444	2.02	0	yes	down	fucP
gene125	-3.89444	2.41	0	yes	down	------
gene1200	-3.89444	1.48	0	yes	down	------
gene184	-3.89444	3.77	0	yes	down	------
gene2811	-3.89444	1.77	0	yes	down	astD
novel0206	-3.10089	158.78	17.23	yes	down	------
sRNA0100	-3.10089	150.12	16.41	yes	down
gene3956	-3.10089	4.57	0.72	yes	down	ybaK
gene3293	-3.10089	3.48	0.56	yes	down	------
gene263	-3.10089	3.68	0.59	yes	down	------
gene69	-3.10089	3.01	0.48	yes	down	acrA
gene5094	-3.10089	9.55	1.42	yes	down	dtd
gene2340	-3.10089	2.51	0.41	yes	down	------
gene1395	-3.10089	3.43	0.55	yes	down	------
gene4059	-3.10089	3.15	0.51	yes	down	------
gene1685	-3.10089	1.99	0.32	yes	down	xylB
gene3179	-3.10089	2.88	0.46	yes	down	ansA
gene755	-3.10089	2.52	0.41	yes	down	------
gene2633	-3.10089	19.75	2.71	yes	down	------
gene2056	-3.10089	3.54	0.56	yes	down	------
gene2043	-3.10089	2.36	0.38	yes	down	nrtA
gene1445	-3.10089	1.79	0.29	yes	down	eutR
gene970	-3.77896	2.18	0	yes	down	pduQ
gene3906	-3.77896	4.68	0	yes	down	------
gene1258	-3.77896	5.41	0	yes	down	yfiM
gene2250	-3.77896	1.07	0	yes	down	------
gene2810	-3.77896	1.76	0	yes	down	astB
gene3497	-3.77896	2.84	0	yes	down	------
gene1688	-3.77896	1.82	0	yes	down	------
gene4716	-3.77896	15.48	0	yes	down	------
gene1820	-3.77896	1.33	0	yes	down	irtA
gene4591	-3.77896	2.19	0	yes	down	------
gene2016	-3.77896	1.29	0	yes	down	impG
gene539	-3.77896	4.36	0	yes	down	------
gene4603	-3.77896	2.27	0	yes	down	ugpC
gene4833	-3.77896	2.06	0	yes	down	------
gene4566	-3.77896	5.79	0	yes	down	------
gene2862	-3.77896	3.23	0	yes	down	------
novel0187	-3.77896	44.61	0	yes	down	------
gene3864	-3.77896	4.53	0	yes	down	entD
gene1571	-3.77896	3.15	0	yes	down	rhmA
gene1972	-3.77896	3.32	0	yes	down	------
gene4600	-3.77896	2.88	0	yes	down	ugpA
gene4125	-3.77896	3.16	0	yes	down	------
gene3888	-3.77896	3.47	0	yes	down	ddpF
gene782	-3.77896	1.96	0	yes	down	------
gene271	-3.77896	5.75	0	yes	down	arnF
gene4653	-3.77896	2.3	0	yes	down	------
gene3264	-3.77896	3.47	0	yes	down	------
gene4917	-3.77896	3.42	0	yes	down	thiG
gene814	-3.77896	2.38	0	yes	down	------
gene2488	-3.77896	1.8	0	yes	down	guaD
gene985	-3.00135	2.69	0.46	yes	down	------
gene4916	-3.00135	3.81	0.65	yes	down	thiF
gene969	-3.00135	2.03	0.35	yes	down	------
gene1662	-3.00135	3.12	0.53	yes	down	opuA
gene449	-3.00135	2.24	0.39	yes	down	------
gene971	-3.00135	1.95	0.34	yes	down	pduP
gene2375	-3.00135	3.31	0.57	yes	down	------
gene4073	-3.00135	3.53	0.6	yes	down	fbaA
gene713	-3.00135	5.48	0.91	yes	down	------
gene4402	-3.00135	1.49	0.26	yes	down	oadA
gene3021	-3.00135	2.75	0.47	yes	down	------
gene2163	-3.00135	3.77	0.64	yes	down	ssuC
gene5059	-3.00135	2.87	0.49	yes	down	rhaR
gene2173	-3.00135	4.45	0.75	yes	down	------
gene2983	-3.00135	2.09	0.36	yes	down	celF
gene2260	-3.00135	5.74	0.95	yes	down	------
gene2336	-3.00135	2.85	0.49	yes	down	cydB
novel0166	-3.00135	26.46	3.73	yes	down	------
gene4826	-3.00135	4.7	0.79	yes	down	gst
gene4872	-3.00135	4.81	0.81	yes	down	psiE
gene4627	-3.00135	2.8	0.48	yes	down	argF
gene2204	-3.71127	1.39	0	yes	down	------
gene4890	-3.65343	2.88	0	yes	down	sorM
gene2663	-3.65343	1.77	0	yes	down	dtnK
gene4329	-3.65343	6.57	0	yes	down	mutT
gene3700	-3.65343	7.16	0	yes	down	ymgA
gene1084	-3.65343	2.02	0	yes	down	hmuS
gene4794	-3.65343	3.2	0	yes	down	phnK
gene5079	-3.65343	3.07	0	yes	down	fbaA
gene2807	-3.65343	1.36	0	yes	down	------
gene3083	-3.65343	3.38	0	yes	down	------
gene183	-3.65343	5.09	0	yes	down	------
gene933	-3.65343	3.99	0	yes	down	racX
gene4831	-3.65343	2.74	0	yes	down	------
gene3885	-3.65343	2.07	0	yes	down	------
gene3866	-3.65343	2.51	0	yes	down	tktA
gene1113	-3.65343	2.44	0	yes	down	hycD
sRNA0582	-3.65343	58.76	0	yes	down
gene2491	-3.65343	3.28	0	yes	down	hpxA
gene1126	-3.65343	1.96	0	yes	down	norW
gene701	-3.65343	1.3	0	yes	down	------
gene871	-3.65343	1.55	0	yes	down	yebQ
gene721	-3.65343	3.12	0	yes	down	parA
gene3843	-3.65343	1.41	0	yes	down	------
gene2812	-3.51592	1.88	0	yes	down	astA
gene1690	-3.51592	1.97	0	yes	down	------
gene2975	-3.51592	2.16	0	yes	down	------
gene1438	-3.51592	1.79	0	yes	down	eutG
gene2753	-3.51592	6.1	0	yes	down	------
gene4270	-3.51592	1.64	0	yes	down	gspF
gene2948	-3.51592	5.57	0	yes	down	------
novel0099	-3.51592	37.17	0	yes	down	yfiC
gene3832	-3.51592	1.61	0	yes	down	------
gene270	-3.51592	9.9	0	yes	down	arnE
gene2666	-3.51592	1.37	0	yes	down	------
gene3848	-3.51592	2.36	0	yes	down	------
gene3825	-3.51592	2.09	0	yes	down	rbsC
gene1672	-3.51592	1.45	0	yes	down	pbuG
gene2968	-3.51592	2.83	0	yes	down	------
gene1058	-3.51592	2.29	0	yes	down	cysD
gene77	-3.51592	4.49	0	yes	down	------
gene1813	-3.51592	0.92	0	yes	down	fyuA
gene2367	-3.51592	3.12	0	yes	down	------
gene1970	-3.51592	2.74	0	yes	down	------
gene3653	-3.51592	2.95	0	yes	down	------
gene2380	-3.51592	1.54	0	yes	down	------
gene896	-3.51592	3.31	0	yes	down	fimC
gene3408	-3.51592	4.07	0	yes	down	rutE
gene2172	-3.51592	2.6	0	yes	down	------
gene3156	-3.51592	5.97	0	yes	down	------
gene5036	-3.51592	7.68	0	yes	down	pcaC
gene4367	-3.36392	3.77	0	yes	down	thiQ
gene2818	-3.36392	5.86	0	yes	down	slyA
gene1176	-3.36392	8.19	0	yes	down	------
gene5001	-3.36392	2.79	0	yes	down	------
gene4904	-3.36392	5.6	0	yes	down	zraR
gene59	-3.36392	2.8	0	yes	down	ligK
gene1083	-3.36392	2.38	0	yes	down	hmuT
gene42	-3.36392	2.41	0	yes	down	phnX
gene4000	-3.36392	9.16	0	yes	down	------
gene1028	-3.36392	2.18	0	yes	down	metQ
gene4278	-3.36392	2.92	0	yes	down	gspN
gene1822	-3.36392	1.4	0	yes	down	ybtX
gene2415	-3.36392	2.27	0	yes	down	------
gene227	-3.36392	13.96	0	yes	down	------
gene4795	-3.36392	3.02	0	yes	down	phnL
gene2386	-3.36392	1.04	0	yes	down	afuB
gene1454	-3.36392	2.18	0	yes	down	cysW
gene4873	-3.36392	1.32	0	yes	down	------
gene3448	-3.36392	2.78	0	yes	down	tfoX
gene1684	-3.36392	1.25	0	yes	down	dalD
gene1925	-3.36392	1.19	0	yes	down	yebQ
gene2176	-3.36392	1.45	0	yes	down	mdtM
gene1981	-3.36392	2.18	0	yes	down	livG
gene4137	-3.36392	2.16	0	yes	down	phnE
gene3826	-3.36392	1.85	0	yes	down	rbsC
gene2626	-3.36392	2.13	0	yes	down	------
gene2641	-3.36392	4.68	0	yes	down	------
gene1136	-3.36392	3.86	0	yes	down	srlA
gene4122	-3.36392	3.15	0	yes	down	livF
gene2589	-3.36392	1.08	0	yes	down	pct
gene2480	-3.36392	2.76	0	yes	down	thiZ
gene1692	-3.36392	2.34	0	yes	down	ddpD
gene2653	-3.36392	2.8	0	yes	down	------
gene2231	-3.36392	2.1	0	yes	down	------
gene1689	-3.36392	1.06	0	yes	down	------
gene3019	-3.36392	3.49	0	yes	down	------
gene2976	-3.36392	2.26	0	yes	down	------
novel0230	-3.36392	21.26	0	yes	down	------
gene4494	-3.36392	3.74	0	yes	down	dgoA
gene2519	-3.36392	1.91	0	yes	down	------
gene2582	-3.36392	2.44	0	yes	down	deoC
gene4503	-3.36392	3.15	0	yes	down	hpaG
gene4488	-3.36392	1.81	0	yes	down	lgoD
gene1199	-3.194	1.57	0	yes	down	------
gene123	-3.194	1.72	0	yes	down	------
gene4159	-3.194	1.68	0	yes	down	acoA
gene3409	-3.194	4.21	0	yes	down	rutF
gene5083	-3.194	16.33	0	yes	down	------
gene1222	-3.194	9.78	0	yes	down	------
gene4076	-3.194	2.59	0	yes	down	------
gene4109	-3.194	2.08	0	yes	down	tauC
gene2766	-3.194	2.43	0	yes	down	pcaI
gene2370	-3.194	1.16	0	yes	down	------
gene2747	-3.194	2.76	0	yes	down	mdcG
gene1081	-3.194	1.98	0	yes	down	hmuV
gene968	-3.194	3.54	0	yes	down	------
gene2636	-3.194	2.2	0	yes	down	metN
gene880	-3.194	7.92	0	yes	down	arsR
gene2389	-3.194	2.61	0	yes	down	narJ
gene11	-3.194	2.64	0	yes	down	dgoD
gene1821	-3.194	0.89	0	yes	down	irtB
gene636	-3.194	5.05	0	yes	down	dhbE
gene4508	-3.194	2	0	yes	down	hpaH
gene3140	-3.194	1.54	0	yes	down	gutB
gene4889	-3.194	2.17	0	yes	down	sorA
gene4496	-3.194	1.04	0	yes	down	------
gene823	-3.194	2.38	0	yes	down	------
gene1687	-3.194	2.78	0	yes	down	hxpB
gene3692	-3.194	3.89	0	yes	down	------
gene1968	-3.194	1.89	0	yes	down	------
gene4526	-3.194	7.03	0	yes	down	------
gene1784	-3.194	3.38	0	yes	down	------
gene48	-3.194	6.51	0	yes	down	------
gene2045	-3.194	2.21	0	yes	down	nrtC
novel0044	-3.194	144.5	0	yes	down	------
gene2880	-3.194	2.26	0	yes	down	------
gene2126	-3.194	6.01	0	yes	down	------
novel0116	-3.194	41.12	0	yes	down	------
novel0047	-3.194	30.2	0	yes	down	------
gene4060	-3.194	6.2	0	yes	down	------
gene2885	-3.194	1.35	0	yes	down	impH
gene350	-3.194	3.95	0	yes	down	hofN
novel0270	-3.194	13.82	0	yes	down	acrR
gene2568	-3.194	1.53	0	yes	down	------
gene2183	-3.194	0.82	0	yes	down	afuB
gene4554	-3.194	5.74	0	yes	down	cusF
gene2492	-3.194	1.77	0	yes	down	hpxB
gene3835	-3.194	1.83	0	yes	down	suhB
gene384	-3.194	6.25	0	yes	down	tusD
gene3928	-3.194	2.73	0	yes	down	------
gene432	8.62271	2.44	1346.56	yes	up	------
novel0092	3.1099	672.39	6774.63	yes	up	------
novel0214	7.53827	0	1155.01	yes	up	umuD
gene1796	3.52221	1.55	24.4	yes	up	------
novel0292	4.4215	45.42	805.24	yes	up	------
novel0087	4.4215	45.42	805.24	yes	up	------
novel0027	4.4215	45.42	805.24	yes	up	------
novel0390	4.4215	45.42	805.24	yes	up	------
novel0356	4.4215	45.42	805.24	yes	up	------
novel0409	4.4215	45.42	805.24	yes	up	------
gene3005	3.74859	1	18.04	yes	up	------
gene828	6.14086	0	9.17	yes	up	------
gene3240	5.53501	0	5.74	yes	up	------
novel0002	5.20654	0	5	yes	up	------
novel0151	5.20654	0	5	yes	up	------
gene120	5.19281	0	4.73	yes	up	------
novel0212	5.03251	0	456.71	yes	up	------
gene2075	3.61336	7.91	93.46	yes	up	------
gene2954	3.12793	0.66	7.32	yes	up	------
novel0342	3.12793	159.89	916.27	yes	up	------
gene1347	3.12793	0.53	6.01	yes	up	------
