# Supplementary material for: Characteristic, genomics and transcriptomics comparation of phages Kp84B and Kp84S infecting Klebsiella pneumoniae
Source: Research Square preprint supplement (doi:10.21203/rs.3.rs-7611342/v1), 2025-09-30
Supplement: Supplementary file 2 [file 57d35f692719de4ca8663db7.xlsx]

## Sheet: Sheet1
contig_id	feature_id	type	location	start	stop	strand	function	aliases	figfam	evidence_codes	nucleotide_sequence	aa_sequence
Kp84B	fig|6666666.1391305.peg.1	peg	Kp84B_11_220	11	220	+	Phage holin, class II Gp17.5				atgttatccctagacttcaacaacgaagttatcaaggcggctcccattgcgggggtcgctggggctgacggtgtagcgaggctcttttggggcctctcactcaacgagtggttctacgtcgcggcaatcgcctacacagtggttcaaattggtgccaaggtagtcgacaaaatcattgactggaagaaagcaaacagaggttactcgtga	MLSLDFNNEVIKAAPIAGVAGADGVARLFWGLSLNEWFYVAAIAYTVVQIGAKVVDKIIDWKKANRGYS
Kp84B	fig|6666666.1391305.peg.2	peg	Kp84B_254_511	254	511	+	Phage terminase small subunit Gp18, DNA packaging				atggacctgattaaattcctcgaaatgttagacactgaaatggctcagcagatgctaatggacctgaagaatcccgagaagcgaacccctcagctgtacaacgccattggtaaactactggagcgacacaagttccaaatctctaagctgaccccagacgttaacatcttgggcggtctggctgagggtctggaggcttataactccaaggtgggtgcggatggtctgacagacgatgatgcgttcaccttacagtga	MDLIKFLEMLDTEMAQQMLMDLKNPEKRTPQLYNAIGKLLERHKFQISKLTPDVNILGGLAEGLEAYNSKVGADGLTDDDAFTLQ
Kp84B	fig|6666666.1391305.peg.3	peg	Kp84B_608_1054	608	1054	+	Phage Rz-like lysis protein Gp18.5				atgctggagttcacaaagagaatcgtcccgtatcttgtggctataatggtgtttgcctccgggtggcacttgggttcgcaatctacggacgctaaatggaaggaggtagtacagaatgaatacgtcaagaagcaaacggctagagctgaaactcagaaatcgattgacgcagtatcggctaagtaccaagcagaccttgaagggctggagggcagcactgataggattattgctgatttgcgtagcgacaataagcggctgcgcgtcagagtcaaacctaccagtgtcgccgcaggaccagacggtcgatgcctcgttgatggttccgtcgaactacacgaagcaactgctcgaagtcttatcgcaataacccagaaggccgacctcaaagagaaggcc…	MLEFTKRIVPYLVAIMVFASGWHLGSQSTDAKWKEVVQNEYVKKQTARAETQKSIDAVSAKYQADLEGLEGSTDRIIADLRSDNKRLRVRVKPTSVAAGPDGRCLVDGSVELHEATARSLIAITQKADLKEKALQDTIRKLQGKGGGH
Kp84B	fig|6666666.1391305.peg.4	peg	Kp84B_1051_2808	1051	2808	+	Phage terminase large subunit Gp19, DNA packaging				ttgagcaactcccagcaagccaagaacgccttaatcattgcgcaactgaagggtgactttgtcgcctttctcttcgtgctctggaaggccctgaacctgccggaaccgaccaagtgtcaaatcgacatggccaagtgtctggcggacccaaagaacaagaagtttatccttcaggctttccgtggtatcgggaagtcgttcatcacgtgtgcgttcgtagtgtggactctgtggcgtgaccctcagttaaagatactgatcgtctcagcctcaaaggaacgtgcggacgctaactccatcttcatcaagaacatcatcgacttgttgcctttcctgagtgagcttaagcctcgccccggtcagcgtgactccgtgattagctttgatgtaggccctgcc…	MSNSQQAKNALIIAQLKGDFVAFLFVLWKALNLPEPTKCQIDMAKCLADPKNKKFILQAFRGIGKSFITCAFVVWTLWRDPQLKILIVSASKERADANSIFIKNIIDLLPFLSELKPRPGQRDSVISFDVGPAKPDHSPSVKSVGITGQLTGSRADIIIADDVEIPGNSATQGAREKLWTLVQEFAALLKPLPTSRVIYLGTPQTEMTLYKELEDNRGYSTIIWPAQYPRSKEEDLYYGDRLAPMLRSEYDEDKEGLSSQPTDPVRFDSMDLQEREVEYGKAGYTLQFMLNPNLSDAEKYPLRLRDAIVCGLQADKAPMHYQWLPNRQNRNEELPNVGMKGDEIYSFHTASSNTGAYQGKILVIDPSGRGKDETGWCILYTLNGYIYLMDAGGTRGYEE…
Kp84B	fig|6666666.1391305.peg.5	peg	Kp84B_2818_3252	2818	3252	+	Phage protein Gp2.8/Gp7.7 contains HNH endonuclease motif				atgtttgacgtgaggtatgacccggatgtgccggggtgcctctctaactctaagggtgagcaactcgcagttctacaaggagaatacttcaagtggaacggcgggagtgctcatcgtattgtatgggaaggcttcaatggtaggataccagacggttacatggttgaccatataaaccgcaacaagcaggacagtcggatagagaacctacgactggtcactcggtcccagaatgtccataactccaagcgcgagagggctgatgggatgcccaaaggaattacagcacgacagcgggactttaggattctggtccataaggattgtaagaagtacgtaaggtacgcaccgacacttgcggaagccataaaggtccgcgaggagcttgtagagtccttg…	MFDVRYDPDVPGCLSNSKGEQLAVLQGEYFKWNGGSAHRIVWEGFNGRIPDGYMVDHINRNKQDSRIENLRLVTRSQNVHNSKRERADGMPKGITARQRDFRILVHKDCKKYVRYAPTLAEAIKVREELVESLGLSAYYVDSVA
Kp84B	fig|6666666.1391305.peg.6	peg	Kp84B_4333_4545	4333	4545	+	hypothetical protein				gtgggttctcatggctaccgtgtggtaaacctgaggttagacggtaagtcgtccatgttctgcgtccataggttggtagcttatagttacctaacgattgatgaggataggcagctggtcaatcataaggatggcgacaagaccaataacactctgaataacttagagtttgttacgcacagtgaaaaatatatcacattattatcaaaataa	MGSHGYRVVNLRLDGKSSMFCVHRLVAYSYLTIDEDRQLVNHKDGDKTNNTLNNLEFVTHSEKYITLLSK
Kp84B	fig|6666666.1391305.peg.7	peg	Kp84B_4887_5033	4887	5033	+	Phage protein				atgattaagtatggcatcactctggaagacctgaagtattaccgattcgctctcatgcacggtaaacaccacgactacctaatggcccaactggcccagacctaccgcgcacgcaaggtaatgtatggtaaccctgttcgtaattag	MIKYGITLEDLKYYRFALMHGKHHDYLMAQLAQTYRARKVMYGNPVRN
Kp84B	fig|6666666.1391305.peg.8	peg	Kp84B_5011_5208	5011	5208	+	Phage protein				atggtaaccctgttcgtaattagtgtgtacgccctgagtgtcctgtactttgtgcgggactttcgcaagggtctcaaggtgcacaaagcatcattcagttacatgaagtggggcgtgctgcctcgctttactgtacggctacctaatggccgctttaaggccaacaaagtggggatattctatgtcgcaacatactaa	MVTLFVISVYALSVLYFVRDFRKGLKVHKASFSYMKWGVLPRFTVRLPNGRFKANKVGIFYVATY
Kp84B	fig|6666666.1391305.peg.9	peg	Kp84B_5192_5425	5192	5425	+	Phage protein				atgtcgcaacatactaacctgaagaaagccttcaagattgcacggatggtgatggcatacgggtccggggagaagaggacaaggagaatacttgcggcgagggctggaagattaccagctagacagcgtaaatgggtaatgcaacaagtatacacggagttgcaccaccctcagcggataccagaaggctacatacggtctcctgtaggctggaaacgagtagcaactaactaa	MSQHTNLKKAFKIARMVMAYGSGEKRTRRILAARAGRLPARQRKWVMQQVYTELHHPQRIPEGYIRSPVGWKRVATN
Kp84B	fig|6666666.1391305.peg.10	peg	Kp84B_5460_6473	5460	6473	+	Phage serine/threonine kinase involved in host transcription shutoff Gp0.7				atgaactacaccgacatgttagaacgcttagacgtcatccgtaacctgccaatctgtgaactcgacaagcgccagccgctgctggttgcactcatcgcagacatagtgaactgcgagacgtccgacggtgacgatacggatagcgatcggggtctggagcgtcaggactattggcaaaccttgaagattaaggccaaagacgctgggtttaacctgctgggcaatggccacttcagcgcagcgtttaagcacgagctgctaccgggtagggtcattaaggttggctttaagaaagaagacgcaggggccgcctacgtggctttctgccggatgcaccaaggtaaggtagggatacctaacgtctatcacgtagcgcgtcacgctgggtgctacacggtg…	MNYTDMLERLDVIRNLPICELDKRQPLLVALIADIVNCETSDGDDTDSDRGLERQDYWQTLKIKAKDAGFNLLGNGHFSAAFKHELLPGRVIKVGFKKEDAGAAYVAFCRMHQGKVGIPNVYHVARHAGCYTVVLDELEPCKRRFNATHEHYADLANYFVENSDAELGDVDGAEKELPFVETCKMINKFFYGIASFDMHSGNIMFTKDGKPVITDPVSFSADRDREPFSLEPEDLLAEIEQIAHDKMIERGKRNKAKRDRDSTLCRARRANNKARRNRVKAAARWRKEYEKRDAEILKEGLAKIEERILAWQVGHGLAIQQGKPLPIDNYLQGRLMG
Kp84B	fig|6666666.1391305.peg.11	peg	Kp84B_6544_9264	6544	9264	+	Phage DNA-directed RNA polymerase (EC 2.7.7.6)				atgaacgcattaaacattgcacgtaatgacttctcagagattgaactagccgctattccgtacaacatcctcagcgagcactacggggacaagctggcacgtgagcagttagcactggaacatgaagcgtatgagctgggcgagcagcgtttcctgaagatgttagagcgtcaggtgaaagctggcgagttcgctgacaacgtggccgcgaagccgctggtcataacgttgcacccacagctgaccaagcgcattgacgactggaaggaggagcaagcaagcgcacgcggtaagaagcctcgcgcatactacccgattaagcatggtgtaccctcagagttggcccttagcatgggcgctgaggtgctcaaagagaagcgtggtgtatccagcgaggca…	MNALNIARNDFSEIELAAIPYNILSEHYGDKLAREQLALEHEAYELGEQRFLKMLERQVKAGEFADNVAAKPLVITLHPQLTKRIDDWKEEQASARGKKPRAYYPIKHGVPSELALSMGAEVLKEKRGVSSEAIALLTIKVVLGTLTDASKATIQQVSSQLGKALEDEARFGRIREQEAAYFKKNVADQLDKRVGHVYKKAFMQVVEADMISKGMLGGDNWASWKTDEQMHVGTKLLELLIEGTGLVEMTKNKMADGSDDVTSMQMVQLSPAFVELLSKRAGALAGISPMHQPCVVPPKPWVGTVGGGYWSVGRRPLALVRTHSKKALRRYEDVHMPEVYKAVNLAQNTPWKVNKKVLAVVNEIINWKHCPVGDVPAIEREELPPRPDDIDTNEVARKA…
Kp84B	fig|6666666.1391305.peg.12	peg	Kp84B_9363_9539	9363	9539	+	Phage protein				atgtatcagaacacaatcaacttcgagcgcaaccgtgaacgtcagcagaccgagggttacatccctaaaggccgcaagctgaacaagacaaagcgtggtggcggcgttaagggttccttccgtaacgccaagggtgacagcgttgttaaccaagagaaatacttcgtaggagcataa	MYQNTINFERNRERQQTEGYIPKGRKLNKTKRGGGVKGSFRNAKGDSVVNQEKYFVGA
Kp84B	fig|6666666.1391305.peg.13	peg	Kp84B_9543_9800	9543	9800	+	Phage protein				atggctactgaaaaaagatggcttttcgatgggagcacctcacaatggtctcgtttaggagcagcggagcgtagactactggatacgacaggcctgcacgtggtcatgcttgacgaccacttcactaacaccgtgctgttcaacgtattcgagccacgcgggtcacttctaataagtaatcggttcagccactggtcgattgactcagcgtcagactggctggcaaaactcacagccgactactcaagttggaaatga	MATEKRWLFDGSTSQWSRLGAAERRLLDTTGLHVVMLDDHFTNTVLFNVFEPRGSLLISNRFSHWSIDSASDWLAKLTADYSSWK
Kp84B	fig|6666666.1391305.peg.14	peg	Kp84B_9901_10914	9901	10914	+	Phage-associated ATP-dependent DNA ligase (EC 6.5.1.1)				atgatgaacattaagactaatccatttaaggccgtatcgttcgttcgctctgctatcgagaaggcgctggagacttccggttaccttattgcagacactaagcacgatggcgtacgcgggaacatttgcgtagacaacacagccaacgcagcgtggctaagccgggtatccaagaccattccggcgcttgagcacctcaacggtttcgaccagcgctggcagaagttactgaaggatgaccgctggattttccctgatggctttatgcttgatggggaactcatggtcaaaggtgtggactttaacaccgggtctggcctcctgcgcaccaagtacatcaaagccaagaattatgacttccacaatagtgactgggacctcaaggataagaaagcaccc…	MMNIKTNPFKAVSFVRSAIEKALETSGYLIADTKHDGVRGNICVDNTANAAWLSRVSKTIPALEHLNGFDQRWQKLLKDDRWIFPDGFMLDGELMVKGVDFNTGSGLLRTKYIKAKNYDFHNSDWDLKDKKAPFHLDPEHLKVVLYDIIPLDIIESGDDYNVMTLLRLEHVKVALPVLQDHFPEIDWCLSESREVYDMDELDALYRQKREEGHEGLVVKDPRGIYKRGKKSGWFKCKPNDEADGIIQGVNWGTPGLANEGKVIGFSVLLETGRLVDANNISRALMDEFTANVKEHGEEYYNGWSCQIDYMEETKDGSLRHPSFTCFRGTEDNPSEKI
Kp84B	fig|6666666.1391305.peg.15	peg	Kp84B_11197_11072	11197	11072	-	hypothetical protein				atgtttctcaccgcttacacaatgggacctgactttgctatttgcattgttgacgctggtggttacagctctcaggttttcaatgcgattgtcgctagggtctctattaatatggtctatcactag	MFLTAYTMGPDFAICIVDAGGYSSQVFNAIVARVSINMVYH
Kp84B	fig|6666666.1391305.peg.16	peg	Kp84B_11424_11687	11424	11687	+	Phage protein Gp1.6				atgcgcttacacttcaataaatccaacggtatcttctcggttcgccgggaggaccgcagcactgtagcagccactgagcgccacggtaagattccacgtatcggcgacaccttcgagctggcacccagcgttcacatcttggttactagcggtctctacgaattggctcagactaagagccgtcctttcgtacccgttgtggtaaccaagtggccacgccttcgtctgttctgggagcgcattaaggaggtcgtaaatgactga	MRLHFNKSNGIFSVRREDRSTVAATERHGKIPRIGDTFELAPSVHILVTSGLYELAQTKSRPFVPVVVTKWPRLRLFWERIKEVVND
Kp84B	fig|6666666.1391305.peg.17	peg	Kp84B_11680_12105	11680	12105	+	Phage nucleotide kinase Gp1.7, phosphorylates dGMP to dGDP and dTMP to dTDP				atgactgaacgtgaaattcaagtggtggacctactggttgaacaaaacactgaccggcaagactccacaacgtgcgctgatggcgtcatatgctacaaggtatcgtgcagtaagtgtccgctagacaccaaaggtacgaccattggggaagtccgcgcaatgaagggcagcaaggctcctagtgtagaagatgacggcgttaagcaaccaagtcactaccagctgttcggaggcatcgaggccattgaggtgattgctcgcagtatgactcaggagatgttcaaagggtactgcctcgggaacatcctcaagtaccgccttcgggccgggaagaagtccgagctggctaccttagagaaagacatggcgaaggccgctttctatctggaactttacgag…	MTEREIQVVDLLVEQNTDRQDSTTCADGVICYKVSCSKCPLDTKGTTIGEVRAMKGSKAPSVEDDGVKQPSHYQLFGGIEAIEVIARSMTQEMFKGYCLGNILKYRLRAGKKSELATLEKDMAKAAFYLELYEKHKGLCHD
Kp84B	fig|6666666.1391305.peg.18	peg	Kp84B_12098_12235	12098	12235	+	hypothetical protein				atgattgagttaacaccgagtcgtattgaaatcctgaagtattgggccaaggacttcctcagtatctaccagactgagtacttcaccaaggaggagcttgagttcattgaggagattctcagccatgaacccgagtga	MIELTPSRIEILKYWAKDFLSIYQTEYFTKEELEFIEEILSHEPE
Kp84B	fig|6666666.1391305.peg.19	peg	Kp84B_12222_12347	12222	12347	+	Phage protein Gp1.8				atgaacccgagtgactggtgccgcgagatgtacgagaagacgctcgaccctgcgtacatcaccctgtataacatgtggaaggagtgggaagatgcaaaagttcgttgtaacggtcgagacagctaa	MNPSDWCREMYEKTLDPAYITLYNMWKEWEDAKVRCNGRDS
Kp84B	fig|6666666.1391305.peg.20	peg	Kp84B_12313_12462	12313	12462	+	Phage protein Gp2, bacterial RNA polymerase inhibitor				atgcaaaagttcgttgtaacggtcgagacagctaacgcatcgtatgaactcccggtgtacgctgggtctcttgaggagaccctagaagttgccgaggcggagtacgaagagttaggccaagtgactcgggtacgcccagatagtcattag	MQKFVVTVETANASYELPVYAGSLEETLEVAEAEYEELGQVTRVRPDSH
Kp84B	fig|6666666.1391305.peg.21	peg	Kp84B_12522_13220	12522	13220	+	Phage single-stranded DNA-binding protein Gp2.5				atggcattcgctaagaagaagatttataccaccaagattggtacctgtgagccgtatgcttacttcaacaagccggactatggcggtgagggttttgagaacccacgcggtacctacaaaggttccgtaacgttcaagaacgaagactgtcaggagctggtagacctcattgttaagacccatgaggaaaactacgcggcccgtctggaagctcacgaagcgaacccgccgaaggttcagaagggcaagaaaccactgaagccgtacgaaggcgacatgccgttcttcgacaatggtgatggaaccaccacgttcaacttcaagtgctacggttcgtacgaggacaagaagactggcgagaccaagaagattgttctgggcgtagtagacgcgaagggc…	MAFAKKKIYTTKIGTCEPYAYFNKPDYGGEGFENPRGTYKGSVTFKNEDCQELVDLIVKTHEENYAARLEAHEANPPKVQKGKKPLKPYEGDMPFFDNGDGTTTFNFKCYGSYEDKKTGETKKIVLGVVDAKGKRIQDVPIIGGGSKVKIRFSLVPYGWSAVAGASVKLQLEGVMLVELATFGGGEDDWADEAVEGGYEADESRSRKPQEDQEDWSGEEEDDEGEAEEDDDF
Kp84B	fig|6666666.1391305.peg.22	peg	Kp84B_13220_13669	13220	13669	+	Phage endonuclease I (EC 3.1.21.2), four-way DNA junctions resolving				atggcgggctatggggccaaagggattcggaaggtgggtgccttccggtctggccttgaggacaaggtgtccaagcagttagaagcaaagggcgtcacgttcgactacgaattgtggcgcatcccttacgttattcctgcgagtgaccacctttacactcccgacttcttgcttcctaacggaatcttcgtggagactaagggtctctgggaagccgaggaccgcaagaagcacctactgattcgtgatcaatacccggagttagacatccggttagtgttctcatcgagtcgcactaagatttataaagggtcgcccaccagttacgctgagtggtgtgagaagcataacatcttgtttgccgacaaattgattcccgtagactggctgaaggagccg…	MAGYGAKGIRKVGAFRSGLEDKVSKQLEAKGVTFDYELWRIPYVIPASDHLYTPDFLLPNGIFVETKGLWEAEDRKKHLLIRDQYPELDIRLVFSSSRTKIYKGSPTSYAEWCEKHNILFADKLIPVDWLKEPKRDVQFGKFKQKKGAK
Kp84B	fig|6666666.1391305.peg.23	peg	Kp84B_13669_14106	13669	14106	+	Phage protein Gp2.8/Gp7.7 contains HNH endonuclease motif				atgattcaccccaaacttgagatagtgcctaccgattcctgcatcgaatggacaggagcgcaccacaagaatggatacggagtcatctcccttaaccgcaaggttgcccacgagctgggcgtgtcgcgtgtacagttcgtccaccgagcgtcatacatacagcacaagggacccattcctagtgggcttgtagtccgccatacgtgcgacaataagcgctgctataaccctgagcatttgctgcttgggacacagaaagataatgcagacgacgctgtggagcgcggcctgtctaaacgaaaactaaccgatgcagatgtggaggtaatacgctcatccagtgaatctaacaggaagttaggtaaatactatggagtcagtgcaacaactatctatcac…	MIHPKLEIVPTDSCIEWTGAHHKNGYGVISLNRKVAHELGVSRVQFVHRASYIQHKGPIPSGLVVRHTCDNKRCYNPEHLLLGTQKDNADDAVERGLSKRKLTDADVEVIRSSSESNRKLGKYYGVSATTIYHIKHGTKWRHVNA
Kp84B	fig|6666666.1391305.peg.24	peg	Kp84B_14099_14554	14099	14554	+	Phage endolysin			isu;Phage_lysis_modules	atgcctaaggtacaattcactaaacgaaaggagacctctcagattttcgtacactgctccgcaaccaagccgtctatggacattggtgtccgggagattgctcagtggcacaaggagcagggatggttagcaattggatatcactttgtgattcgtcgtgatggcaccgtcgaggcgggccgtgaccaagatgctgtgggttctcacgtcaagggatacaactcgacttctgtcggtgtgtgtctggtgggcggtatcgacgcgaagggtaaccccgaggcaaacttcacgccagcccagatgcagtctctgcgttcactgctggtagaactgaaggtgcaatactccggggctgtgctaatggcacatcacgatgtggcacctaaagcctgtccaagc…	MPKVQFTKRKETSQIFVHCSATKPSMDIGVREIAQWHKEQGWLAIGYHFVIRRDGTVEAGRDQDAVGSHVKGYNSTSVGVCLVGGIDAKGNPEANFTPAQMQSLRSLLVELKVQYSGAVLMAHHDVAPKACPSFDLKRWWEKNELVTSDRG
Kp84B	fig|6666666.1391305.peg.25	peg	Kp84B_14705_14824	14705	14824	+	Phage protein				atgaacaacttgaaagacttcgacataatcccgctgctggcgtatggcgtgctaggactttggggcgtgacattcctcatagcgttcttcatgtcgtgtgttgacgggacggctttatga	MNNLKDFDIIPLLAYGVLGLWGVTFLIAFFMSCVDGTAL
Kp84B	fig|6666666.1391305.peg.26	peg	Kp84B_14821_15060	14821	15060	+	Phage protein Gp2.8/Gp7.7 contains HNH endonuclease motif				atgagaaagtcctataagcaataccacaaaggcccaagaggacacatacgggtttgggaagcagctaatgggcctatacctgatgggtactacatagaccacattgacggcaatccactcaacgatgacctaagtaacttgcgcttggcgcttccgaaagagaactcatggaacatgaagactccgaagagtaacaagacagggctgaaaggtttatcgtggaaggctagtcatgagtag	MRKSYKQYHKGPRGHIRVWEAANGPIPDGYYIDHIDGNPLNDDLSNLRLALPKENSWNMKTPKSNKTGLKGLSWKASHE
Kp84B	fig|6666666.1391305.peg.27	peg	Kp84B_15227_15138	15227	15138	-	hypothetical protein				atgagccacaatgctcgcaaggtatgtgataaaggaaaacactatctgaatctagcgaattgtccatgtaactctctcctcatgcggtaa	MSHNARKVCDKGKHYLNLANCPCNSLLMR
Kp84B	fig|6666666.1391305.peg.28	peg	Kp84B_15353_16879	15353	16879	+	Phage primase/helicase protein Gp4A				atgaatacgcaaggtgcaggtttattggtattcggtgagagtgatggtcggtacactgacctgacagctcgaggtatctcgaaggcaacgtgccagaaggccgggtactgggttgccaaggtccgtggtgcagcctaccaagtggctgactatcgggaccagaatggctccatcgtctctcagaagttgcgggacaaggagaagaacttctctacccgagggtctcacaaaggggacgcactgttcggtaagcacctgtggaatggcggcaagaagattgttgtcaccgagggtgaaatcgatatgttaaccgtgatgcaactacaggattgtaagtggcctgtggtgtcattaggtcacggtgcgtcagccgctaagaaaacctgtagtgcaaactat…	MNTQGAGLLVFGESDGRYTDLTARGISKATCQKAGYWVAKVRGAAYQVADYRDQNGSIVSQKLRDKEKNFSTRGSHKGDALFGKHLWNGGKKIVVTEGEIDMLTVMQLQDCKWPVVSLGHGASAAKKTCSANYEYFDSFDQIILMFDMDDPGRAAIEEAAQVLPPGKVHVAVLTEKDANECLLKGKGKEVLDQIWNAAPWVPDGVIGAMSMKDRVREAMTSEQSVGYLFSGCPGLNDRTLGARGGEVIMVTSGSGMGKSTFVRQQALGFARGQGLRVGMAMLEESVEETMEDVLGIANGIRLRQQPREFKRKLIEDGTYDKWFDELYGTDQFHLYDSFAEAEVDRLLAKLHYMRTGLNCDVIILDHISIVVSASEESDERKMIDRLMTKLKGFAKSTGV…
Kp84B	fig|6666666.1391305.peg.29	peg	Kp84B_16882_17187	16882	17187	+	Phage protein Gp4.3				atgacgagtggtgctcctgtgagcactgctgtccaacactcgaagcattcagagaaagaatgtacagagactttaaccgtaaataggagaaccatcatgtttaaactcatcgaaactttaggccgtctggtcgtcgcactgtacatccgtgaagccaaggcactggacaaagcgtccaaggtggaagcggaagcagccgctaagctggctaaagcagccgacaaggcacgtcaggcatctctggatgcaaccgcagaggcagcgaaagttgcacttaaagctcagaaacttaaggagttcttctaa	MTSGAPVSTAVQHSKHSEKECTETLTVNRRTIMFKLIETLGRLVVALYIREAKALDKASKVEAEAAAKLAKAADKARQASLDATAEAAKVALKAQKLKEFF
Kp84B	fig|6666666.1391305.peg.30	peg	Kp84B_17187_17471	17187	17471	+	Phage protein Gp4.5, inhibitor of host toxin/antitoxin system				atgactaccaaagctaaattccccggcaataccattcagctgtccgacactgtagaccagtggggccgtaaggttcacatcaacgttcgcaatgataaggttactctggtctaccgctggaaggccaagagcgataaccgtgcgcacactcagcgtgtgaccctcgacgatactcaagcagctcgcctgctggcatctgtggctgtagcagcagctgtagctgtcggtgaggacaaagtgcgtgacgccattctgagtaaagaggttggagaaacctccatgtga	MTTKAKFPGNTIQLSDTVDQWGRKVHINVRNDKVTLVYRWKAKSDNRAHTQRVTLDDTQAARLLASVAVAAAVAVGEDKVRDAILSKEVGETSM
Kp84B	fig|6666666.1391305.peg.31	peg	Kp84B_17768_19882	17768	19882	+	Phage DNA-directed DNA polymerase (EC 2.7.7.7)				gtgctagttacagacatcgaggcgaacaacctcttagagaaagtcactcagttccactgcggtgtcatttatgactacagcacggacgagtacgtatcgtatcgaccttgggacttctcagcgtatctcgatgcgttggaagctgaggtggctcgtggtggtctcatcgtattccacaacggtcacaagtacgatgccccagtgttgacaaagctggctaagcaccagttaaaccgagagttccacctgccgcgtgagaacgtagtggacacgttggtacttagccgtttgctttttgcgaacattaaggacacagacatggccttgctgcgttccggtagattacccggtaagcgcttcgggtctcacgctctggaggcgtggggttaccgcttaggc…	MLVTDIEANNLLEKVTQFHCGVIYDYSTDEYVSYRPWDFSAYLDALEAEVARGGLIVFHNGHKYDAPVLTKLAKHQLNREFHLPRENVVDTLVLSRLLFANIKDTDMALLRSGRLPGKRFGSHALEAWGYRLGEMKGEYKDDFKKLLEEQGEDYVDGAEWISFNEPMMAYNVQDVVVTKALLENLLSDKHYFPAGIDFTDVGETTFWSESCEAVWLEHRAAWLLAKQERNGFPFNTKAIEELYVELAGRRSELLQTLTDTFGTWYQPKGGTELFLHPRTGKPLGKYPRVKYPKQGAIYKKPKNKAQREGREPCELDTRDYVEGAPYTPVEHVVFNPSSRDHIALKLKEAGWVPTEFTDKGAPKVDDEVLEHVRVEDPEKQRCIDLIKEYLMIQKRIGQA…
Kp84B	fig|6666666.1391305.peg.32	peg	Kp84B_19901_20185	19901	20185	+	Phage protein Gp5.5 suppressor of silencing				atgggaattaacaaacagtttcgcgtaacgttcgacgtaacagcgactatgagtaacgagcaggagcaggagttccttgaggacctgctgggattggcatacggcgtggacgacaagcgtcaggctcacattgtaaccgaagcaaccaccaaaggtcacgaggcggcactatcattcgtcatgcagagcggtctgcgagaagctattaaggacctcggtaaggagctgagctgttccactgtgaccgtacgcttctccccagcaattgtgagggtgaccaagtga	MGINKQFRVTFDVTATMSNEQEQEFLEDLLGLAYGVDDKRQAHIVTEATTKGHEAALSFVMQSGLREAIKDLGKELSCSTVTVRFSPAIVRVTK
Kp84B	fig|6666666.1391305.peg.33	peg	Kp84B_20182_20391	20182	20391	+	Phage protein Gp5.7				gtgagcgagtacctcaaagttctggcggccctcaagggctgccctaagtccttccagtcgaactacgtgcgcaacaacgctacgttagtcgctgaggctgcgagccgtggtcacatttcgtgcctgaccatgagtggtcgtaatggtggcgcttgggaaattaccagtgccggagtgaaattccttaagacccatggaggttgcttatga	MSEYLKVLAALKGCPKSFQSNYVRNNATLVAEAASRGHISCLTMSGRNGGAWEITSAGVKFLKTHGGCL
Kp84B	fig|6666666.1391305.peg.34	peg	Kp84B_20388_20771	20388	20771	+	hypothetical protein				atgagtaagttaacagataacgttaaaggttacgtgaaggagctaggtgagcgtgagaccgagcatcgtaagtattcatcgttttaccttacgatttccttgaaggttaccgagagtgacgctgagaacgaagaagaacttctcccgtacgttggtaaagagattgtcgctaatggaatgtgggatgacacttgtggtgatgagatttatgactggaaagtattctctgtggagacctctgaggaagatacagaggctcgttcagagttccgtgagttactctctcatctcaacgctgaggacaacagtatggccctagacttccttgagaagcaccttaagcccaaactggtggagaatcgggtggaggttcaccatgagtaa	MSKLTDNVKGYVKELGERETEHRKYSSFYLTISLKVTESDAENEEELLPYVGKEIVANGMWDDTCGDEIYDWKVFSVETSEEDTEARSEFRELLSHLNAEDNSMALDFLEKHLKPKLVENRVEVHHE
Kp84B	fig|6666666.1391305.peg.35	peg	Kp84B_20764_20940	20764	20940	+	Phage protein				atgagtaagcggatggtgttcgtacacccgttggaacctaaatcacactgggaaactgctggcggcatcgtctggttttataaggatggttacatgctgcggcagtcccatgtcacccacaaggaccttcacgacccgaagatgggttttaaattcaaggagttaacgaatgagtaa	MSKRMVFVHPLEPKSHWETAGGIVWFYKDGYMLRQSHVTHKDLHDPKMGFKFKELTNE
Kp84B	fig|6666666.1391305.peg.36	peg	Kp84B_20933_21838	20933	21838	+	Phage exonuclease (EC 3.1.11.3)				atgagtaagcacacattgttatccttcagtgactaccgggcaacccagaagattgccaaaggtgtccttgtgatggatggtgactggttggtattccaagccatgagtgccgctgagttcgatgcctcgtgggaggaggagatttggcagcgttgctgtgaccacgctaaggcccgagagattctggagaactccatcgagtcctacaagggccgcaagaaggcatggaaaaacgccgatgtagtcctagcgttcaccgaccgtgtcaactggcgtaagctgctggtggacccaacgtacaaagagaaccgagctgtcactaagaagcctgtgggttacttcgagttccttgagtccgtctttgagacctacacgtgcgtccttgagcctcagctcgaa…	MSKHTLLSFSDYRATQKIAKGVLVMDGDWLVFQAMSAAEFDASWEEEIWQRCCDHAKAREILENSIESYKGRKKAWKNADVVLAFTDRVNWRKLLVDPTYKENRAVTKKPVGYFEFLESVFETYTCVLEPQLEGDDVMGIIGSNPLQFNYEKAVLVSCDKDFKTIPDCDFLWCTTGNILVQTRETADYWHLFQTIKGDITDGYGGIPGWGDTAEDFLKEPFIVEPVTSVLKSGKNKGQEVTKWVKRAPEAGETLWDCIKSIGAKAGMTEEEVIKQGQMARILRSDEYNIETGEITLWQPGS
Kp84B	fig|6666666.1391305.peg.37	peg	Kp84B_21820_21930	21820	21930	+	Phage protein Gp6.3				atggcaaccgggcagctgattcttatcgtcctgaccatgggcttaatcgctcgtggtctctggatgttggccttgattatcaagcagatagtcgagcataaagcagagtga	MATGQLILIVLTMGLIARGLWMLALIIKQIVEHKAE
Kp84B	fig|6666666.1391305.peg.38	peg	Kp84B_22017_22262	22017	22262	+	Phage protein Gp6.5				atgttaaaacctatagagcacatccttaacaatcctaatgaccttcctgacgtaccgcgagctgtcaaggagtacctacagtctcgcttcaatgctgacttcctgtatcagtcagaggtccgtaagttgcgtgaggctggccacagtgaggagttcatctccggggtactgtacggtcactacatggcttcgcgtgtccttgatgagatggagggtcgtcagcgtgcactcaaagaaggagattga	MLKPIEHILNNPNDLPDVPRAVKEYLQSRFNADFLYQSEVRKLREAGHSEEFISGVLYGHYMASRVLDEMEGRQRALKEGD
Kp84B	fig|6666666.1391305.peg.39	peg	Kp84B_22265_22486	22265	22486	+	Phage virion protein Gp6.7 ejected into infected cell				atgtgtttctcacctaagatgaaagcacctaaggttgacacgacgaccgtccctgagccagcgccacttactgaggaacctaagggtatccagtacggtggtgaagagggctcaaacagcaccactcctgaggtgtcaggccgtaagtcactaaaggtggccaagacgactgagcctacagggtccggtagtaaaatccgtaagtcagctttaggaggctaa	MCFSPKMKAPKVDTTTVPEPAPLTEEPKGIQYGGEEGSNSTTPEVSGRKSLKVAKTTEPTGSGSKIRKSALGG
Kp84B	fig|6666666.1391305.peg.40	peg	Kp84B_22488_22748	22488	22748	+	Phage virion assembly protein Gp7.3 ejected into infected cell				atgggactgttcaagaaaatcaagaaggctatctccaaggtagtcaaggcaccgctcaaggcagtgggtctggcagcagatgcacctaatgtgcagacagccgctgagacacctgtggccgcacctcaggaagcaccgaaagaagtcgtagaggatgttgagccttcagcagacaccgagtctggtaagaagaaatcacgtgcgtctggtaagaagtcactctcagtttcccgcagctcaggcggtgggcttaacctgtaa	MGLFKKIKKAISKVVKAPLKAVGLAADAPNVQTAAETPVAAPQEAPKEVVEDVEPSADTESGKKKSRASGKKSLSVSRSSGGGLNL
Kp84B	fig|6666666.1391305.peg.41	peg	Kp84B_22760_24367	22760	24367	+	Phage collar, head-to-tail connector protein Gp8				gtggcagaagttaaactcgaaggcttcgcagaggagggagccaaggcggtgtacgaccgtctgaagaacgaccgacaaccttacgagacacgagcagagtcctgtgcgcagtacacgattccctcactgttccctaaggactccgataacgcatcaactgattacacgactccgtggcagtccgtaggtgcacgtggcctgaacaacctagcgtcaaagttgatgctggcactgttcccgatgcagtcatggatgaagttgaccattagtgaatacgaagcgaagaacctacttggtgacgctgagggtctcgctaaggtcgatgagggtctctcaatggtagagcgaatcatcatgaactacatcgagtccaacagctatcgagtgactctctttgag…	MAEVKLEGFAEEGAKAVYDRLKNDRQPYETRAESCAQYTIPSLFPKDSDNASTDYTTPWQSVGARGLNNLASKLMLALFPMQSWMKLTISEYEAKNLLGDAEGLAKVDEGLSMVERIIMNYIESNSYRVTLFECLKQLCVAGNALLYLPEPEGYTPMKLYRLNSYVVQRDAFGNVLQIVTLDKIAFNALPEDVRGQVEAAQGEQKEDAEIDIYTHVYLNEAGDGYSKYEEVAEEVVPGSEAEYPLEECPYIPVRMVRIDGESYGRSYVEEYLGDLKSLENLQESIVKMAMITAKVIGLVDPAGITQVRRLTAAQSGAFVPGRKQDIEFLQLEKSGDFTVAKNVSDTIEARLSYAFMLNSAVQRTGERVTAEEIRYVASELEDTLGGVYSILSQELQLPL…
Kp84B	fig|6666666.1391305.peg.42	peg	Kp84B_24471_25415	24471	25415	+	Phage capsid assembly scaffolding protein Gp9				atggctggcgaatctaacgcagacgtatatgcatccttcggtgttaacagtgctgtactgactggtagcacacctgaggagcaccaagaaaacatgttggctcttgatgttgctgcccgtgatggcgatgatgcaatcgagctgaacaccaacagtgatgacccgtatggctccgatgtggacccgttcggtgaacctgaagagggccgtatgcaggtccgtatctccgctgacggtgatgaccctgaagagtctaccgaaggtgaggaagctgaagaagaagaacagcagggcgacactgaagtaaccgaaggtgaacctgaagagttcaagcctattggcgaaactccggctgacatcaatgaagcctctcagcagctggaagaacacgaagctggc…	MAGESNADVYASFGVNSAVLTGSTPEEHQENMLALDVAARDGDDAIELNTNSDDPYGSDVDPFGEPEEGRMQVRISADGDDPEESTEGEEAEEEEQQGDTEVTEGEPEEFKPIGETPADINEASQQLEEHEAGFNDMVATAIERGLSQDAVTRIQQEYQNEDSLSDESYKELAEAGYSKAFVDAYIRGQEALVNQYVDKVMDFVGGRERFQQVYGHMQTNNPEGAEALIKAFESRDVATMKTILNLAGQSRDKTFGKKAERTITKRATPAKPVARKAEGFESQAEMIKAMSDPRYRTDSKYRSEVEQKVIDSKF
Kp84B	fig|6666666.1391305.peg.43	peg	Kp84B_25641_26675	25641	26675	+	Phage major capsid protein Gp10A				atggctaacatgcaaggtggacagcagctcggtactaaccaaggtaaaggtcaatccgcagcagacaagctggcgctattcctgaaagtattcggcggtgaagtcctgaccgcattcgctcgtacctctgtgacctctaaccgccacatgcagcgtcaaatcagctccggtaagtccgcacagttccctgtgattggtcgcaccaaggctgcttacctgcaaccgggcgagtctctggatgacaaacgtaaagacatcaagcacaccgagaagaccattaacattgatggcctgctgactgcggacgtgctgatttacgacatcgaagacgcgatgaaccactatgacgtgcgctccgagtacacctctcagattggtgaatctctggcgatggcagct…	MANMQGGQQLGTNQGKGQSAADKLALFLKVFGGEVLTAFARTSVTSNRHMQRQISSGKSAQFPVIGRTKAAYLQPGESLDDKRKDIKHTEKTINIDGLLTADVLIYDIEDAMNHYDVRSEYTSQIGESLAMAADGAVLAELAGLVNLADSVNENIAGLGKPSLLEVGAKADLTDPVKLGQAVIAQLTIARAALTKNYVPANDRTFYTIPDVYSAILAALMPNAANYAALIDPERGSIRNVMGFEVVEVPHLTAGGAGDDRPDEGAEATNQKHAFPATGGKVNKENVVGLFQHRSAVGTVKLKDLALERARRAEYQADQIIAKYAMGHGGLRPESAGALVFKASA
Kp84B	fig|6666666.1391305.peg.44	peg	Kp84B_26856_27434	26856	27434	+	Phage non-contractile tail tubular protein Gp11				atgaacatgcaagatgcttactttgggtctgccgctgagctggatgcagtcaacgagatgctcgcagccatcggtgaatcccctgtgaccacccttgacgaagatggtaacgcagacgtagcgaacgctcgtcgtatcctcaacaggattaaccgccagattcagtctaaaggttgggccttcaacatcaacgagtcggccacactaaccccggacgcagacactgggcttatcccattccgccctgcctacctgtccatccttggtggtcagtacgttaaccgtggtgggtgggtgtacgataagtccacagggacagacaccttctctgggccaatcaatgtgaccctgattacccttcaggattacgacgagatgcctgagtgtttccgccagtgg…	MNMQDAYFGSAAELDAVNEMLAAIGESPVTTLDEDGNADVANARRILNRINRQIQSKGWAFNINESATLTPDADTGLIPFRPAYLSILGGQYVNRGGWVYDKSTGTDTFSGPINVTLITLQDYDEMPECFRQWIVTKASRQFNSRFFGAEDVENSLAQEEMEARMACNEYEMDFGQYNMIDGDSFVGGIIGR
Kp84B	fig|6666666.1391305.peg.45	peg	Kp84B_27460_29835	27460	29835	+	Phage non-contractile tail tubular protein Gp12				atggcactggtaagtcagtcgataaaaaatcttaagggaggcattagccagcagcctgaaatcttacggtacccagagcagggtgcacttcaggtcaacggttggtcctccgagactgagggtctccagaagcgaccacccatggtgttcatcaagtccttaggggaccgtgggtaccttggagaagacccatatgtccacctcatcaaccgagatgagttcgagcagtattacgctgtgttcacagggaatgatgtaagggtgttcgacctgtccggttatgagtatcaggtcagaggtgaccgctcttatgtgaccgtcaataaccctaaggataacttgcggatggtcacagtggctgactatacgttcatcgtcaacaggaccagacaggtgcgc…	MALVSQSIKNLKGGISQQPEILRYPEQGALQVNGWSSETEGLQKRPPMVFIKSLGDRGYLGEDPYVHLINRDEFEQYYAVFTGNDVRVFDLSGYEYQVRGDRSYVTVNNPKDNLRMVTVADYTFIVNRTRQVRESPLQTNGGVFRDNVDALINVRGGQYGRKLEVNINGVWVSHQLPPGDNAKDDPPKVDAQAIAEALAVLLRAAHPTWTFNVGTGYIHCIAPADTTIDVFETKDGYADQLINPVTHYVQSFSKLPLNAPDGYMVKIVGDTSKTADQYYVKYDKSQKVWKETVGWNIAVGLEYHTMPWTLVRAADGNFDLGYHDWKDRRAGDEDTNPQPSFVNSTITDVFFFRNRLGFISGENIVLSRTSKYFEFYPPSVANYTDDDPLDVAVSHNRVS…
Kp84B	fig|6666666.1391305.peg.46	peg	Kp84B_29909_30322	29909	30322	+	Phage scaffold protein Gp13, required for Gp6.7 incorporation into virion				atgtacataagaaacactgtaagtaatgacttcgagttattcatcccggcctaccatgacgtacttgaggcgcaggccatgggtatagaaccatcgttcccagcggttactgagtgtgtcacgttagaccacgatggttttcctttggctataggtggaaacgttggagactgttgttggcttgtgaccagtgataaggttgagaagttaaaccttaaagccaagctcaagttccgtaagctggtgattgagtatcgagaccaaatgctcgaacgatatgagtccttatggaattttgtttatattgaaaatgagccacacattaggttcttaaagtccatcggtgcggagttccaagaggaatacacctgcgatggtaagtttcaactattcatcatt…	MYIRNTVSNDFELFIPAYHDVLEAQAMGIEPSFPAVTECVTLDHDGFPLAIGGNVGDCCWLVTSDKVEKLNLKAKLKFRKLVIEYRDQMLERYESLWNFVYIENEPHIRFLKSIGAEFQEEYTCDGKFQLFIIRRKS
Kp84B	fig|6666666.1391305.peg.47	peg	Kp84B_30319_30504	30319	30504	+	VR7ORF006c hypothetical protein				atgaagtgctgctccaagatttgtggtaaacatgaatcggagcaacgtagggcgctggctgtagaccattgccatacaactggttccgttcgtggtctattgtgtgataactgcaaccgaggcatctggtactttagggataaccatgaggtactcaaggccgctataaagtatctaggaggataa	MKCCSKICGKHESEQRRALAVDHCHTTGSVRGLLCDNCNRGIWYFRDNHEVLKAAIKYLGG
Kp84B	fig|6666666.1391305.peg.48	peg	Kp84B_30509_31099	30509	31099	+	Phage DNA ejectosome component, internal virion protein Gp14				atgtgttgggtagccgcaataccaattgcaatgacggcggtgcaggccatcggtcagtcacgcaatgaagccaagatgattggccttcagaatgaccagatgcgccgacagtctgtccagatgattaaagagtcaaacattcagaacgctaacgccagccttgagcagaagcagaagctggaagaagctagtgcggacttaaccgctaagaatctcgataaggttcaggccatgggtacaatccgtgcagcaatcggagagggaaaccttgagggagccagtatggaccgtatcagtcgaatcgaggagggcaagttcattcgggaggccaacgcggtcaccgataattatcgtcgagattatgcgtcactgttcgctcaacagctaggtaactctgag…	MCWVAAIPIAMTAVQAIGQSRNEAKMIGLQNDQMRRQSVQMIKESNIQNANASLEQKQKLEEASADLTAKNLDKVQAMGTIRAAIGEGNLEGASMDRISRIEEGKFIREANAVTDNYRRDYASLFAQQLGNSESTMDQVKSMQKAEGKGKSKLEQVLDPLAMMGSQAASAYASGAFDSKSTKPPISQAKGTKVGGK
Kp84B	fig|6666666.1391305.peg.49	peg	Kp84B_31099_33354	31099	33354	+	Phage DNA ejectosome component, internal virion protein Gp15				atggctagtaaattagaacaagcgttgggccaactaccacaggccgggtctacccgcatccgtggaggctcggcgtccatgcagtatcgcccagtaaccattcaacaggaaggtgtccggcagtccaacctagtacagtccttggtgaagtttggggcagcgatgggtgaagcagtagatgcttacgacaagcgccagcgcgataaggctgaggagcggtccgatgagattatccgtaagttgaccccagagcagcgccgagaggcaatcaagaacgggacactgctgtatcaggatgacccgtacgctatggaggccctacggttcaagactggccgtaacgctgcgttcctcattgacgacgaagtggcgcagcgcgttcagaacggtgagttccgt…	MASKLEQALGQLPQAGSTRIRGGSASMQYRPVTIQQEGVRQSNLVQSLVKFGAAMGEAVDAYDKRQRDKAEERSDEIIRKLTPEQRREAIKNGTLLYQDDPYAMEALRFKTGRNAAFLIDDEVAQRVQNGEFRTRAEMEEYRHKRLTEGANEFAEQFMINPEDSEFQRGFNANITERNISLYGKHDTFLSEQAQKGAILASKVELSGVLKDPSVLARPESGEFFQRYIDNALKTGSIPSDAQAQQVIIGSLNDVIQRPGATNFLQSLEGRQVTLNGKTTTYKELMGEEQWNALMVKAQSTQFDNDAKLSEGFRLGITSALNQDDTSKGWEMLQGAKAELDRLQPGEQMTPERERLIQAEEQMQARFRQEAQAAAKEMDKRQKTINKNQVIDQQFTKRIS…
Kp84B	fig|6666666.1391305.peg.50	peg	Kp84B_33371_37321	33371	37321	+	Phage DNA ejectosome component Gp16, peptidoglycan lytic exotransglycosylase (EC 4.2.2.n1)				atgagctacgacaagtccagacctagtgactacgacggtatcttccagaaggcagcagactctcacggagttagctatgacctgctgcgtaaactgtccttcaacgaatcatccttcaaccccaaggccgtctctaagactggccctaaaggaatcatgcaattcacccgcaacacggcccgcgctatgggccttaacgtgaccgatggtgacgacgatgatcgttacaacccagagttagccattgatgctggcgctaagctgcttgcgagcctcgttaagaagtacaatggggatgagctgaaagcagccctagcgtacaaccaaggggaaggcccagcgggcgcacctcagcttcaggattacgataagggagacttcgggtctatctcggaggaa…	MSYDKSRPSDYDGIFQKAADSHGVSYDLLRKLSFNESSFNPKAVSKTGPKGIMQFTRNTARAMGLNVTDGDDDDRYNPELAIDAGAKLLASLVKKYNGDELKAALAYNQGEGPAGAPQLQDYDKGDFGSISEEGRNYMRKLLDVAKSPNSGALEAFGGITPKGKGIPAEDAFKGISKAGKVGTELPESHGFDVEGVAQEAPNTPYAKDFWEKTGTTLDEYNSRSTFFGFGDAADAQLQNSTLGVAFRAARADDGYDVFKDTMTPTRWNSYVPSKEDLQKLRDSGLPPSYYGVVTGGDGENWDALIKLAKDNFEADQRAAEAGTGAKLAAGIVGAGVDPLSYVPLVGVAGKGLKVVNKALRVGAQAGALSVASEGIRTSVAGGEAHYADAALGGLLFGAG…
Kp84B	fig|6666666.1391305.peg.51	peg	Kp84B_37399_40452	37399	40452	+	tail fibers protein				atggaccaagatactaaaacaatcatccaataccccaccagtggtgacgaatacgatatcccctttgactacctgtcgcgtaagtttgtccgtgtgtctctcgtatcggatacccagcgcatcttgctggataacatcacagattaccgttacgtctccagaacgcgcgtcaagctgctggtaagtaccgatgggtatagtcgtgtagagattcgacgcttcacctctgcgtccgagatggtcgtggacttcagcgatgggtccgttctccgcgcgaccgaccttaacgtgtccgctctacagtctgcacacatcgcagaggaggctcgtgacttattcagcacatccctgagcattggccaacttagctactttgacgctaaaggtttacagataaag…	MDQDTKTIIQYPTSGDEYDIPFDYLSRKFVRVSLVSDTQRILLDNITDYRYVSRTRVKLLVSTDGYSRVEIRRFTSASEMVVDFSDGSVLRATDLNVSALQSAHIAEEARDLFSTSLSIGQLSYFDAKGLQIKNVAQGVDNTDAATVQQLNKIIADVVTTIPDSVADNIRGLWARVLGDIGITLVDGSFESGATITTRTQALWSISGRKCYTWAGALPKVVPENSTPESTGGISETAWVDSSSKALGVLLAGPSGAERVGLKQGGTVQDAINWLTFDSFDIVKDGSKDVTADIMAACVVANDLGLDIKQNDGTYLVSGNPVWPVYNSLDLNGVTLKLAAGFTGYFALTQKDSTTVYGPTSPIVQAINAAGGRTAGSGVLEGLVNSTELNGKFLFMEGAD…
