# Supplementary material for: Characteristic, genomics and transcriptomics comparation of phages Kp84B and Kp84S infecting Klebsiella pneumoniae
Source: Research Square preprint supplement (doi:10.21203/rs.3.rs-7611342/v1), 2025-09-30
Supplement: Supplementary file 3 [file 64dc7a73606c3f3783286831.xlsx]

## Sheet: Sheet1
Locus (Kp84B)	Kp84B → Kp84S	Amino acid (Kp84B / Kp84S)
6210	G→T	G251C	Phage serine/threonine kinase involved in host
7431	C→T	V256V	Phage DNA-directed RNA polymerase
12692	T→C	I57I	Phage single-stranded DNA-binding protein Gp2.5
13156	A→C	Q212P	Phage single-stranded DNA-binding protein Gp2.5
13163	C→T	D214D	Phage single-stranded DNA-binding protein Gp2.5
13180	A→C	E220A	Phage single-stranded DNA-binding protein Gp2.5
13181-13183	GAT→---	D221 deletion	Phage single-stranded DNA-binding protein Gp2.5
13225	G →A	A2A	Phage endonuclease I
13468	T→G	D83E	Phage endonuclease I
13525	T→C	Y102Y	Phage endonuclease I
13612	G→T	K131N	Phage endonuclease I
14136	C→A	S13Y	Phage endolysin
14239	T→C	Y47Y	Phage endolysin
14829	G→A	K3K	Phage protein Gp2.8/Gp7.7 contains HNH endonuclease motif
14832	C→G	S4S	Phage protein Gp2.8/Gp7.7 contains HNH endonuclease motif
14841	A→G	Q7Q	Phage protein Gp2.8/Gp7.7 contains HNH endonuclease motif
14844	C→T	Y8Y	Phage protein Gp2.8/Gp7.7 contains HNH endonuclease motif
14856	A→C	P12P	Phage protein Gp2.8/Gp7.7 contains HNH endonuclease motif
14865	C→T	H15H	Phage protein Gp2.8/Gp7.7 contains HNH endonuclease motif
14868	A→C	I16I	Phage protein Gp2.8/Gp7.7 contains HNH endonuclease motif
14871	G→A	R17R	Phage protein Gp2.8/Gp7.7 contains HNH endonuclease motif
14874	T→G	V18V	Phage protein Gp2.8/Gp7.7 contains HNH endonuclease motif
14898	A→C	I26I	Phage protein Gp2.8/Gp7.7 contains HNH endonuclease motif
14904	T→C	D28D	Phage protein Gp2.8/Gp7.7 contains HNH endonuclease motif
14910	C→T	Y30Y	Phage protein Gp2.8/Gp7.7 contains HNH endonuclease motif
14952	A→G	L44L	Phage protein Gp2.8/Gp7.7 contains HNH endonuclease motif
14955	T→C	S45S	Phage protein Gp2.8/Gp7.7 contains HNH endonuclease motif
14961	G→A	L47L	Phage protein Gp2.8/Gp7.7 contains HNH endonuclease motif
17406	G→A	A74T	Phage protein Gp4.5, inhibitor of host toxin/antitoxin system
17469	G→C	*95R	Phage protein Gp4.5, inhibitor of host toxin/antitoxin system
19251	C→A	A495D	Phage DNA-directed DNA polymerase
19454	G→A	A563T	Phage DNA-directed DNA polymerase
19470	C→G	A568G	Phage DNA-directed DNA polymerase
19489	C→T	V574V	Phage DNA-directed DNA polymerase
19501	C→A	R578R	Phage DNA-directed DNA polymerase
19507	C→T	V580V	Phage DNA-directed DNA polymerase
19510	C→T	A581A	Phage DNA-directed DNA polymerase
19576	A→T	V603V	Phage DNA-directed DNA polymerase
19589	G→A	A608T	Phage DNA-directed DNA polymerase
19638	G→T	R624L	Phage DNA-directed DNA polymerase
19646	G→A	V627I	Phage DNA-directed DNA polymerase
19648	T→C	V627I	Phage DNA-directed DNA polymerase
19669	T→C	L624L	Phage DNA-directed DNA polymerase
19672	A→G	K635K	Phage DNA-directed DNA polymerase
19674-19675	CG→AA	A636E	Phage DNA-directed DNA polymerase
19678	A→G	G637G	Phage DNA-directed DNA polymerase
19687	C→T	H640H	Phage DNA-directed DNA polymerase
19690	A→C	G641G	Phage DNA-directed DNA polymerase
19696	T→C	D643D	Phage DNA-directed DNA polymerase
19707	T→C	V647A	Phage DNA-directed DNA polymerase
19747	C→T	C660C	Phage DNA-directed DNA polymerase
19810	G→C	G681G	Phage DNA-directed DNA polymerase
19813	A→C	E682D	Phage DNA-directed DNA polymerase
19855	G→A	I696M	Phage DNA-directed DNA polymerase
19858	C→T	G697G	Phage DNA-directed DNA polymerase
19861	T→A	P698P	Phage DNA-directed DNA polymerase
19905-19906	GA→CT	G2A	Phage protein Gp5.5 suppressor of silencing
19911	A→C	N4T	Phage protein Gp5.5 suppressor of silencing
19915	A→G	K5K	Phage protein Gp5.5 suppressor of silencing
19917-19918	AG→GT	Q6R	Phage protein Gp5.5 suppressor of silencing
19920	T→G	F7C	Phage protein Gp5.5 suppressor of silencing
19922-19923	CG→AT	R8I	Phage protein Gp5.5 suppressor of silencing
19929-19930	CG→GC	T10S	Phage protein Gp5.5 suppressor of silencing
19937	G→A	V13M	Phage protein Gp5.5 suppressor of silencing
19939	A→G	V13M	Phage protein Gp5.5 suppressor of silencing
19941-19942	CA→AG	T14K	Phage protein Gp5.5 suppressor of silencing
19943 -19945	GCG→TTT	A15F	Phage protein Gp5.5 suppressor of silencing
19946-19948	ACT→GTG	T16V	Phage protein Gp5.5 suppressor of silencing
19949-19951	ATG→GCT	M17A	Phage protein Gp5.5 suppressor of silencing
19952-19953	AG→TC	S18S	Phage protein Gp5.5 suppressor of silencing
19956-19957	AC→GT	N19S	Phage protein Gp5.5 suppressor of silencing
19958	G→A	E20K	Phage protein Gp5.5 suppressor of silencing
19960	G→A	E20K	Phage protein Gp5.5 suppressor of silencing
19961	C→G	Q21D	Phage protein Gp5.5 suppressor of silencing
19963	G→T	Q21D	Phage protein Gp5.5 suppressor of silencing
19965	A→T	E22V	Phage protein Gp5.5 suppressor of silencing
19967	C→G	Q23E	Phage protein Gp5.5 suppressor of silencing
19969	G→A	Q23E	Phage protein Gp5.5 suppressor of silencing
19971-19972	AG→GT	E24G	Phage protein Gp5.5 suppressor of silencing
19974	T→A	F25Y	Phage protein Gp5.5 suppressor of silencing
19976-19978	CTT→ACC	L26T	Phage protein Gp5.5 suppressor of silencing
19979	G→A	E27K	Phage protein Gp5.5 suppressor of silencing
19982-19984	GAC→CGT	D28R	Phage protein Gp5.5 suppressor of silencing
19985	C→A	L29M	Phage protein Gp5.5 suppressor of silencing
19992-19993	GA→AC	G31D	Phage protein Gp5.5 suppressor of silencing
19994	T→G	L32V	Phage protein Gp5.5 suppressor of silencing
19997	G→T	A33S	Phage protein Gp5.5 suppressor of silencing
19999	A→C	A33S	Phage protein Gp5.5 suppressor of silencing
20000-20002	TAC→CGT	Y34R	Phage protein Gp5.5 suppressor of silencing
20003-20005	GGC→AAG	G35K	Phage protein Gp5.5 suppressor of silencing
20008	G→T	V36V	Phage protein Gp5.5 suppressor of silencing
20010-20011	AC→CT	D37A	Phage protein Gp5.5 suppressor of silencing
20012	G→A	D38N	Phage protein Gp5.5 suppressor of silencing
20015-20016	AA→GG	K39G	Phage protein Gp5.5 suppressor of silencing
20018-20020	CGT→GAG	R40E	Phage protein Gp5.5 suppressor of silencing
20021	C→A	Q41K	Phage protein Gp5.5 suppressor of silencing
20025-20026	CT→TG	A42V	Phage protein Gp5.5 suppressor of silencing
20027-20029	CAC→TCA	H43S	Phage protein Gp5.5 suppressor of silencing
20030-20032	ATT→GGC	I44G	Phage protein Gp5.5 suppressor of silencing
20033	G→A	V45I	Phage protein Gp5.5 suppressor of silencing
20036-20038	ACC→GAG	T46E	Phage protein Gp5.5 suppressor of silencing
20039-20041	GAA→CTG	E47L	Phage protein Gp5.5 suppressor of silencing
20043 / 20016	C→A	A48E	Phage protein Gp5.5 suppressor of silencing
20045-20047	A→C	T49L	Phage protein Gp5.5 suppressor of silencing
20048	A→G	T50A	Phage protein Gp5.5 suppressor of silencing
20050	C→A	T50A	Phage protein Gp5.5 suppressor of silencing
20051-20053	A→C	K51R	Phage protein Gp5.5 suppressor of silencing
20055	G→T	G52V	Phage protein Gp5.5 suppressor of silencing
20057-20058	CA→GC	H53A	Phage protein Gp5.5 suppressor of silencing
20061-20062	AG→TT	E54V	Phage protein Gp5.5 suppressor of silencing
20063	G→A	A55T	Phage protein Gp5.5 suppressor of silencing
20065	G→T	A55T	Phage protein Gp5.5 suppressor of silencing
20067	C→A	A56E	Phage protein Gp5.5 suppressor of silencing
20069-20071	CTA→GGA	L57G	Phage protein Gp5.5 suppressor of silencing
20072-20074	TCA→ATC	S58I	Phage protein Gp5.5 suppressor of silencing
20075-20077	TTC→GAA	F59E	Phage protein Gp5.5 suppressor of silencing
20079-20080	TC→CG	V60A	Phage protein Gp5.5 suppressor of silencing
20081-20083	ATG→TCC	M61S	Phage protein Gp5.5 suppressor of silencing
20084-20086	CAG→ATT	Q62I	Phage protein Gp5.5 suppressor of silencing
20087-20089	AGC→GAG	S63E	Phage protein Gp5.5 suppressor of silencing
20090-20092	GGT→CTA	G64L	Phage protein Gp5.5 suppressor of silencing
20093-20095	CTG→TCC	L65S	Phage protein Gp5.5 suppressor of silencing
20096-20098	CGA→ATG	R66M	Phage protein Gp5.5 suppressor of silencing
20099	G→A	E67K	Phage protein Gp5.5 suppressor of silencing
20101	A→G	E67K	Phage protein Gp5.5 suppressor of silencing
20102	G→T	A68S	Phage protein Gp5.5 suppressor of silencing
20104	T→A	A68S	Phage protein Gp5.5 suppressor of silencing
20105-20107	ATT→GCC	I69A	Phage protein Gp5.5 suppressor of silencing
20109	A→T	K70I	Phage protein Gp5.5 suppressor of silencing
20110	G→T	K70I	Phage protein Gp5.5 suppressor of silencing
20112-20113	AC→TT	D71V	Phage protein Gp5.5 suppressor of silencing
20114-20115	CT→GG	L72G	Phage protein Gp5.5 suppressor of silencing
20117	G→C	G73R	Phage protein Gp5.5 suppressor of silencing
20119	T→A	G73R	Phage protein Gp5.5 suppressor of silencing
20120-20121	AA→CT	K74L	Phage protein Gp5.5 suppressor of silencing
20123	G→A	E75K	Phage protein Gp5.5 suppressor of silencing
20126-20128	CTG→GAT	L76D	Phage protein Gp5.5 suppressor of silencing
20129-20131	AGC→GAG	S77E	Phage protein Gp5.5 suppressor of silencing
20132-20134	TGT→CTG	C78L	Phage protein Gp5.5 suppressor of silencing
20135-20137	TCC→CGA	S79R	Phage protein Gp5.5 suppressor of silencing
20138-20140	ACT→GAG	T80E	Phage protein Gp5.5 suppressor of silencing
20141-20143	GTG→CCT	V81P	Phage protein Gp5.5 suppressor of silencing
20144-20146	ACC→CAG	T82Q	Phage protein Gp5.5 suppressor of silencing
20149	A→G	V83V	Phage protein Gp5.5 suppressor of silencing
20150-20152	CGC→TCG	R84S	Phage protein Gp5.5 suppressor of silencing
20154-20155	TC→GT	F85C	Phage protein Gp5.5 suppressor of silencing
20156-20158	TCC→GGA	S86G	Phage protein Gp5.5 suppressor of silencing
20159-20161	CCA→AAC	P87N	Phage protein Gp5.5 suppressor of silencing
20162-20164	GCA→TTC	A88F	Phage protein Gp5.5 suppressor of silencing
20165-20167	ATT→CGG	I89R	Phage protein Gp5.5 suppressor of silencing
20171	A→G	R91G	Phage protein Gp5.5 suppressor of silencing
20174	G→T	V92F	Phage protein Gp5.5 suppressor of silencing
20176	G→C	V92F	Phage protein Gp5.5 suppressor of silencing
20178-20179	C→A	T93K	Phage protein Gp5.5 suppressor of silencing
20180-20182	AAG→CGA	K94R	Phage protein Gp5.5 suppressor of silencing
20187	C→T	S2S	Phage protein Gp5.7
20193	C→T	Y4Y	Phage protein Gp5.7
20226	T→C	P15P	Phage protein Gp5.7
20253	C→G	R24R	Phage protein Gp5.7
20263	A→G	T28A	Phage protein Gp5.7
21436	C→T	C168C	Phage exonuclease
21442	C→T	F170F	Phage exonuclease
21544	A→C	G204G	Phage exonuclease
21843	T→C	L8L	Phage protein Gp6.3
21846	C→T	I9I	Phage protein Gp6.3
21851	T→C	L11P	Phage protein Gp6.3
21865	A→G	I16V	Phage protein Gp6.3
21873	T→C	R18R	Phage protein Gp6.3
21888	G→A	L23L	Phage protein Gp6.3
21912	C→T	V31V	Phage protein Gp6.3
21918	T→C	H33H	Phage protein Gp6.3
21923 -21924	CA→AG	A35E	Phage protein Gp6.3
21925-21927	GAG→ AAG	E36K	Phage protein Gp6.3
22181	G→C	G55G	Phage protein Gp6.5
22190	C→T	Y58Y	Phage protein Gp6.5
22197	T→C	Y61H	Phage protein Gp6.5
22208	G→A	S64S	Phage protein Gp6.5
22232	T→A	G72G	Phage protein Gp6.5
22235	T→C	R73R	Phage protein Gp6.5
22276	A→G	S4S	Phage virion protein Gp6.7 ejected into infecte
22402	A→T	S46S	Phage virion protein Gp6.7 ejected into infecte
22405	C→T	G47G	Phage virion protein Gp6.7 ejected into infecte
22417	A→C	L51L	Phage virion protein Gp6.7 ejected into infecte
22435	T→A	T57T	Phage virion protein Gp6.7 ejected into infecte
22541	G→A	P18P	Phage virion assembly protein Gp7.3 ejected int
22577	T→C	N30N	Phage virion assembly protein Gp7.3 ejected int
22584	A→G	T33A	Phage virion assembly protein Gp7.3 ejected int
22614	C→A	Q43K	Phage virion assembly protein Gp7.3 ejected int
22631	A→G	E48E	Phage virion assembly protein Gp7.3 ejected int
22637	A→G	V50V	Phage virion assembly protein Gp7.3 ejected int
22643	T→C	D52D	Phage virion assembly protein Gp7.3 ejected int
22649	G→A	E54E	Phage virion assembly protein Gp7.3 ejected int
22650	C→T	P55S	Phage virion assembly protein Gp7.3 ejected int
22664	C→T	T59T	Phage virion assembly protein Gp7.3 ejected int
22683	T→A	S66T	Phage virion assembly protein Gp7.3 ejected int
22685	A→T	S66T	Phage virion assembly protein Gp7.3 ejected int
22694	T→C	S69S	Phage virion assembly protein Gp7.3 ejected int
22697	T→C	G70G	Phage virion assembly protein Gp7.3 ejected int
22706	A→C	S73S	Phage virion assembly protein Gp7.3 ejected int
22737	C→A	L84I	Phage virion assembly protein Gp7.3 ejected int
22743-22745	CTG→TTA	L86L	Phage virion assembly protein Gp7.3 ejected int
22795	G→A	E12E	Phage collar, head-to-tail connector protein Gp8
22810	G→A	V17V	Phage collar, head-to-tail connector protein Gp8
22837	A→G	Q26Q	Phage collar, head-to-tail connector protein Gp8
22885	A→G	S42S	Phage collar, head-to-tail connector protein Gp8
22918	T→C	T53T	Phage collar, head-to-tail connector protein Gp8
22927	G→A	T56T	Phage collar, head-to-tail connector protein Gp8
22939	G→A	Q60Q	Phage collar, head-to-tail connector protein Gp8
22951	A→T	A64A	Phage collar, head-to-tail connector protein Gp8
22975	A→C	S72S	Phage collar, head-to-tail connector protein Gp8
22978	G→A	K73K	Phage collar, head-to-tail connector protein Gp8
22979	T→C	L74L	Phage collar, head-to-tail connector protein Gp8
22990	A→C	A77A	Phage collar, head-to-tail connector protein Gp8
23018	T→C	L87L	Phage collar, head-to-tail connector protein Gp8
23032	A→G	E91E	Phage collar, head-to-tail connector protein Gp8
23050	A→T	L97L	Phage collar, head-to-tail connector protein Gp8
23053	T→G	L98L	Phage collar, head-to-tail connector protein Gp8
23074	T→C	A105A	Phage collar, head-to-tail connector protein Gp8
23134	C→T	N125N	Phage collar, head-to-tail connector protein Gp8
23137	C→T	S126S	Phage collar, head-to-tail connector protein Gp8
23140	T→C	Y127Y	Phage collar, head-to-tail connector protein Gp8
23170	G→A	Q137Q	Phage collar, head-to-tail connector protein Gp8
23188	C→T	N143.N	Phage collar, head-to-tail connector protein Gp8
23201	T→C	L148L	Phage collar, head-to-tail connector protein Gp8
23227	G→T	P156P	Phage collar, head-to-tail connector protein Gp8
23239	T→C	Y160Y	Phage collar, head-to-tail connector protein Gp8
23242	T→A	R161R	Phage collar, head-to-tail connector protein Gp8
22251	C→G	S164S	Phage collar, head-to-tail connector protein Gp8
23257	A→G	V166V	Phage collar, head-to-tail connector protein Gp8
23266	G→A	R169R	Phage collar, head-to-tail connector protein Gp8
23296	G→C	V179V	Phage collar, head-to-tail connector protein Gp8
23299	C→T	T180T	Phage collar, head-to-tail connector protein Gp8
23302	T→C	L181L	Phage collar, head-to-tail connector protein Gp8
23305	T→C	D182D	Phage collar, head-to-tail connector protein Gp8
23335	C→T	D192D	Phage collar, head-to-tail connector protein Gp8
23341	T→C	R194R	Phage collar, head-to-tail connector protein Gp8
23342	G→A	G195S	Phage collar, head-to-tail connector protein Gp8
23347	G→A		Phage collar, head-to-tail connector protein Gp8
23368	A→G	E203E	Phage collar, head-to-tail connector protein Gp8
23387	A→G	I210V	Phage collar, head-to-tail connector protein Gp8
23393	A→G	I212V	Phage collar, head-to-tail connector protein Gp8
23395	C→T	I212V	Phage collar, head-to-tail connector protein Gp8
23401	T→C	T214T	Phage collar, head-to-tail connector protein Gp8
23425	G→A	G222G	Phage collar, head-to-tail connector protein Gp8
23431	C→A	G224G	Phage collar, head-to-tail connector protein Gp8
23427	C→T	S226L	Phage collar, head-to-tail connector protein Gp8
23455	T→C	A232A	Phage collar, head-to-tail connector protein Gp8
23473	C→A	G238G	Phage collar, head-to-tail connector protein Gp8
23482	C→G	A241A	Phage collar, head-to-tail connector protein Gp8
23491	T→G	P244P	Phage collar, head-to-tail connector protein Gp8
23506	A→G	P.249P	Phage collar, head-to-tail connector protein Gp8
23518	C→A	V253V	Phage collar, head-to-tail connector protein Gp8
23527	G→T	V256V	Phage collar, head-to-tail connector protein Gp8
23530	C→A	R257R	Phage collar, head-to-tail connector protein Gp8
23542	G→A	E261E	Phage collar, head-to-tail connector protein Gp8
23554	T→C	R265R	Phage collar, head-to-tail connector protein Gp8
23578	T→A	G273G	Phage collar, head-to-tail connector protein Gp8
23584	T→C	L275L	Phage collar, head-to-tail connector protein Gp8
23611	A→C	S284S	Phage collar, head-to-tail connector protein Gp8
23638	C→T	A293A	Phage collar, head-to-tail connector protein Gp8
23647	C→A	I296I	Phage collar, head-to-tail connector protein Gp8
23650	G→T	G297G	Phage collar, head-to-tail connector protein Gp8
23668	T→C	G303G	Phage collar, head-to-tail connector protein Gp8
23692	A→G	T311T	Phage collar, head-to-tail connector protein Gp8
23695	C→A	A312A	Phage collar, head-to-tail connector protein Gp8
23698	A→G	A313A	Phage collar, head-to-tail connector protein Gp8
23710	G→T	A317A	Phage collar, head-to-tail connector protein Gp8
23749	A→G	Q330Q	Phage collar, head-to-tail connector protein Gp8
23764	C→T	G335G	Phage collar, head-to-tail connector protein Gp8
23788	A→T	V343V	Phage collar, head-to-tail connector protein Gp8
23797	A→C	T346T	Phage collar, head-to-tail connector protein Gp8
23851	A→G	T364T	Phage collar, head-to-tail connector protein Gp8
23854	C→T	G365G	Phage collar, head-to-tail connector protein Gp8
23909	T→C	L384L	Phage collar, head-to-tail connector protein Gp8
23923	T→C	Y388Y	Phage collar, head-to-tail connector protein Gp8
23935	A→G	S392S	Phage collar, head-to-tail connector protein Gp8
23974	A→G	K405K	Phage collar, head-to-tail connector protein Gp8
24641	C→T	G57G	Phage capsid assembly scaffolding protein Gp9
23692	T→C	R74R	Phage capsid assembly scaffolding protein Gp9
24707	TCCGGC insertion	79 S and G insertion	Phage capsid assembly scaffolding protein Gp9
24708-24717	GATGACCCT deletion	D80, D81,P82 deletion	Phage capsid assembly scaffolding protein Gp9
24737	G→A	E88E	Phage capsid assembly scaffolding protein Gp9
24740	A→G	E89E	Phage capsid assembly scaffolding protein Gp9
24742	C→G	A90G	Phage capsid assembly scaffolding protein Gp9
24744-24746	GAA→TCT	E91S	Phage capsid assembly scaffolding protein Gp9
24767	GATGAGAGGCAGCCGGAG insertion	D, E, R, Q, P,E insertion	Phage capsid assembly scaffolding protein Gp9
24798-24770	ACT→---	T100 deletion	Phage capsid assembly scaffolding protein Gp9
24783	AGG insertion	E insertion	Phage capsid assembly scaffolding protein Gp9
24788	A→G	E106E	Phage capsid assembly scaffolding protein Gp9
27544	G→A	A29T	Phage non-contractile tail tubular protein Gp12
27573	G→T	E38D	Phage non-contractile tail tubular protein Gp12
27594	A→G	R45R	Phage non-contractile tail tubular protein Gp12
27600	C→T	P47P	Phage non-contractile tail tubular protein Gp12
27619	T→A	L54I	Phage non-contractile tail tubular protein Gp12
27621	A→T	L54I	Phage non-contractile tail tubular protein Gp12
27624	G→C	G55G	Phage non-contractile tail tubular protein Gp12
27625-27627	GAC→CCT	D56P	Phage non-contractile tail tubular protein Gp12
27633	G→T	G58G	Phage non-contractile tail tubular protein Gp12
27637	C→T	L60L	Phage non-contractile tail tubular protein Gp12
27639	T→G	L60L	Phage non-contractile tail tubular protein Gp12
27642	A→G	G61G	Phage non-contractile tail tubular protein Gp12
27655	G→A	V66I	Phage non-contractile tail tubular protein Gp12
27870	A→C	L137L	Phage non-contractile tail tubular protein Gp12
27902	T→C	V148A	Phage non-contractile tail tubular protein Gp12
27908	C→G	A150G	Phage non-contractile tail tubular protein Gp12
27910	C→A	L151I	Phage non-contractile tail tubular protein Gp12
27915	T→C	I152I	Phage non-contractile tail tubular protein Gp12
27936	T→C	Y159Y	Phage non-contractile tail tubular protein Gp12
27939	G→T	G160G	Phage non-contractile tail tubular protein Gp12
27959	T→C	N166N	Phage non-contractile tail tubular protein Gp12
27978	T→C	S173S	Phage non-contractile tail tubular protein Gp12
27996	T→C	G179G	Phage non-contractile tail tubular protein Gp12
27999	C→T	D180D	Phage non-contractile tail tubular protein Gp12
28011	T→A	D184E	Phage non-contractile tail tubular protein Gp12
28020	C→T	P187P	Phage non-contractile tail tubular protein Gp12
28026	C→G	V189V	Phage non-contractile tail tubular protein Gp12
28071	A→C	A204A	Phage non-contractile tail tubular protein Gp12
28107	A→G	G216G	Phage non-contractile tail tubular protein Gp12
28132	G→T	D225Y	Phage non-contractile tail tubular protein Gp12
28224	G→A	L255L	Phage non-contractile tail tubular protein Gp12
28302	G→A	K281K	Phage non-contractile tail tubular protein Gp12
28315	C→A	Q286K	Phage non-contractile tail tubular protein Gp12
28348	A→G	I297V	Phage non-contractile tail tubular protein Gp12
28351	G→T	A298S	Phage non-contractile tail tubular protein Gp12
28398	T→G	A313A	Phage non-contractile tail tubular protein Gp12
28404	T→C	D315D	Phage non-contractile tail tubular protein Gp12
28425	C→T	Y322Y	Phage non-contractile tail tubular protein Gp12
28431	T→G	D324E	Phage non-contractile tail tubular protein Gp12
28443	A→C	R328R	Phage non-contractile tail tubular protein Gp12
28446	T→A	R329R	Phage non-contractile tail tubular protein Gp12
28452	C→T	G331G	Phage non-contractile tail tubular protein Gp12
28458	G→T	E333D	Phage non-contractile tail tubular protein Gp12
28473	A→G	Q338Q	Phage non-contractile tail tubular protein Gp12
28476	G→A	P339P	Phage non-contractile tail tubular protein Gp12
28479	A→C	S340S	Phage non-contractile tail tubular protein Gp12
28486	A→G	N343D	Phage non-contractile tail tubular protein Gp12
28491	A→G	S344S	Phage non-contractile tail tubular protein Gp12
28551	C→T	I364I	Phage non-contractile tail tubular protein Gp12
28554	A→G	V365V	Phage non-contractile tail tubular protein Gp12
28555	C→A	L366M	Phage non-contractile tail tubular protein Gp12
28563	C→T	R368R	Phage non-contractile tail tubular protein Gp12
23578	T→C	F373F	Phage non-contractile tail tubular protein Gp12
28593	G→A	P378P	Phage non-contractile tail tubular protein Gp12
28608	T→C	Y383Y	Phage non-contractile tail tubular protein Gp12
28611	G→T	T384T	Phage non-contractile tail tubular protein Gp12
28617	C→T	D386D	Phage non-contractile tail tubular protein Gp12
28623	T→G	P388P	Phage non-contractile tail tubular protein Gp12
28624	T→C	P389P	Phage non-contractile tail tubular protein Gp12
28632	A→T	V391V	Phage non-contractile tail tubular protein Gp12
28638	G→A	V393V	Phage non-contractile tail tubular protein Gp12
28650	T→A	R397R	Phage non-contractile tail tubular protein Gp12
28662	T→C	L401L	Phage non-contractile tail tubular protein Gp12
28668	C→T	Y403Y	Phage non-contractile tail tubular protein Gp12
28695	G→A	L412L	Phage non-contractile tail tubular protein Gp12
28704	C→T	S415S	Phage non-contractile tail tubular protein Gp12
28731	C→A	A424A	Phage non-contractile tail tubular protein Gp12
28746	C→T	S429S	Phage non-contractile tail tubular protein Gp12
28755	T→A	T432T	Phage non-contractile tail tubular protein Gp12
28761	A→G	Q434Q	Phage non-contractile tail tubular protein Gp12
28773	C→A	T438T	Phage non-contractile tail tubular protein Gp12
28796	G→A	R446H	Phage non-contractile tail tubular protein Gp12
28800	A→G	A447A	Phage non-contractile tail tubular protein Gp12
28803	T→C	R448R	Phage non-contractile tail tubular protein Gp12
28809	C→T	Y450Y	Phage non-contractile tail tubular protein Gp12
28812	C→T	G451G	Phage non-contractile tail tubular protein Gp12
28824	C→T	N455N	Phage non-contractile tail tubular protein Gp12
28833	C→T	Y458Y	Phage non-contractile tail tubular protein Gp12
28839	T→C	S460S	Phage non-contractile tail tubular protein Gp12
28840	C→A	P461T	Phage non-contractile tail tubular protein Gp12
28860	A→C	S467S	Phage non-contractile tail tubular protein Gp12
28863	C→T	I468I	Phage non-contractile tail tubular protein Gp12
28889	T→C	V477A	Phage non-contractile tail tubular protein Gp12
28896	T→C	S479S	Phage non-contractile tail tubular protein Gp12
28923	G→C	A488A	Phage non-contractile tail tubular protein Gp12
28929	A→T	V490V	Phage non-contractile tail tubular protein Gp12
28938	C→T	Y493Y	Phage non-contractile tail tubular protein Gp12
28953	G→A	V498V	Phage non-contractile tail tubular protein Gp12
28956	C→T	Y499Y	Phage non-contractile tail tubular protein Gp12
28965	T→C	N502N	Phage non-contractile tail tubular protein Gp12
28995	G→A	V512V	Phage non-contractile tail tubular protein Gp12
28996	T→C	L513L	Phage non-contractile tail tubular protein Gp12
29001	A→C	T514T	Phage non-contractile tail tubular protein Gp12
29010	C→T	A517A	Phage non-contractile tail tubular protein Gp12
29013	T→C	P518P	Phage non-contractile tail tubular protein Gp12
29016	T→C	S519S	Phage non-contractile tail tubular protein Gp12
29061	A→G	R534R	Phage non-contractile tail tubular protein Gp12
29070	G→A	S537S	Phage non-contractile tail tubular protein Gp12
29076	C→G	S539S	Phage non-contractile tail tubular protein Gp12
29091	A→G	G544G	Phage non-contractile tail tubular protein Gp12
29100	G→T	V547V	Phage non-contractile tail tubular protein Gp12
29106	G→T	V549V	Phage non-contractile tail tubular protein Gp12
29121	C→T	C554C	Phage non-contractile tail tubular protein Gp12
29130	A→G	S557S	Phage non-contractile tail tubular protein Gp12
29143	T→C	L562L	Phage non-contractile tail tubular protein Gp12
29151	C→G	R564R	Phage non-contractile tail tubular protein Gp12
29154	C→T	N565N	Phage non-contractile tail tubular protein Gp12
29155	G→A	A566T	Phage non-contractile tail tubular protein Gp12
29178	G→T	A573A	Phage non-contractile tail tubular protein Gp12
29193	G→T	K578N	Phage non-contractile tail tubular protein Gp12
29220	C→T	P587P	Phage non-contractile tail tubular protein Gp12
29255	A→G	H599R	Phage non-contractile tail tubular protein Gp12
29313	T→C	D618D	Phage non-contractile tail tubular protein Gp12
29338	T→G	N626K	Phage non-contractile tail tubular protein Gp12
29352	C→A	I631I	Phage non-contractile tail tubular protein Gp12
29406	T→C	D649D	Phage non-contractile tail tubular protein Gp12
29520	T→C	N687N	Phage non-contractile tail tubular protein Gp12
29526	G→C	G689G	Phage non-contractile tail tubular protein Gp12
29530	G→A	A691T	Phage non-contractile tail tubular protein Gp12
29535	G→C	S692S	Phage non-contractile tail tubular protein Gp12
29539-29541	ATT→GAG	I694E	Phage non-contractile tail tubular protein Gp12
29553	T→C	R698R	Phage non-contractile tail tubular protein Gp12
29565	T→C	R702R	Phage non-contractile tail tubular protein Gp12
29571	T→G	A704A	Phage non-contractile tail tubular protein Gp12
29577	G→T	V706V	Phage non-contractile tail tubular protein Gp12
29585	G→A	R709Q	Phage non-contractile tail tubular protein Gp12
29595	T→C	G712G	Phage non-contractile tail tubular protein Gp12
29610	C→A	S717R	Phage non-contractile tail tubular protein Gp12
29628	T→G	R723R	Phage non-contractile tail tubular protein Gp12
29646	A→C	V729V	Phage non-contractile tail tubular protein Gp12
29653	A→C	R732R	Phage non-contractile tail tubular protein Gp12
29664	G→T	S735S	Phage non-contractile tail tubular protein Gp12
29667	A→T	T736T	Phage non-contractile tail tubular protein Gp12
29676	C→T	R739R	Phage non-contractile tail tubular protein Gp12
29679	A→G	L740L	Phage non-contractile tail tubular protein Gp12
29682	A→C	G741G	Phage non-contractile tail tubular protein Gp12
29685	A→G	Q742Q	Phage non-contractile tail tubular protein Gp12
29700	G→T	T747T	Phage non-contractile tail tubular protein Gp12
29709	C→T	Y750Y	Phage non-contractile tail tubular protein Gp12
29718	G→T	P753P	Phage non-contractile tail tubular protein Gp12
29751	T→C	S764S	Phage non-contractile tail tubular protein Gp12
29752	C→T	L765L	Phage non-contractile tail tubular protein Gp12
29754	A→G	L765L	Phage non-contractile tail tubular protein Gp12
29766	T→C	N769N	Phage non-contractile tail tubular protein Gp12
29775	G→A	P772P	Phage non-contractile tail tubular protein Gp12
29787	C→T	I776I	Phage non-contractile tail tubular protein Gp12
29793	T→C	C777C	Phage non-contractile tail tubular protein Gp12
29802	A→G	E781E	Phage non-contractile tail tubular protein Gp12
29811	T→C	Y784Y	Phage non-contractile tail tubular protein Gp12
29812-29814	ACC→ATG	T785T	Phage non-contractile tail tubular protein Gp12
29815-29817	AAC→AGA	N786R	Phage non-contractile tail tubular protein Gp12
29818-29820	CGC→CTG	R787L	Phage non-contractile tail tubular protein Gp12
29821-29823	GCT→CGT	A788R	Phage non-contractile tail tubular protein Gp12
29824-29826	AAC→ACG	N789T	Phage non-contractile tail tubular protein Gp12
29827-29829	GGT→ACA	G790T	Phage non-contractile tail tubular protein Gp12
29830-29832	ATT→TTG	I791L	Phage non-contractile tail tubular protein Gp12
29833-29835	TAA→AGA	*792R	Phage non-contractile tail tubular protein Gp12
29836-29838	TGG→TCG	R	Phage non-contractile tail tubular protein Gp12
29839-29841	GCG→ACC	T	Phage non-contractile tail tubular protein Gp12
29842-29844	TCT→AGA	R	Phage non-contractile tail tubular protein Gp12
29845-29847	CCC→CGG	R	Phage non-contractile tail tubular protein Gp12
29848-29850	TGT→TAG	*	Phage non-contractile tail tubular protein Gp12
30120	A→G	N71S	Phage scaffold protein Gp13, required for Gp6.7
35338	C→T	G656G	Phage DNA ejectosome component Gp16, peptidoglycan lytic exotransglycosylase
35344	C→A	R658R	Phage DNA ejectosome component Gp16, peptidoglycan lytic exotransglycosylase
35347	C→T	H659H	Phage DNA ejectosome component Gp16, peptidoglycan lytic exotransglycosylase
35362	G→T	V664V	Phage DNA ejectosome component Gp16, peptidoglycan lytic exotransglycosylase
35371	G→A	V667V	Phage DNA ejectosome component Gp16, peptidoglycan lytic exotransglycosylase
35381	G→A	R670R	Phage DNA ejectosome component Gp16, peptidoglycan lytic exotransglycosylase
35402	G→T	M677I	Phage DNA ejectosome component Gp16, peptidoglycan lytic exotransglycosylase
35413	C→T	G681G	Phage DNA ejectosome component Gp16, peptidoglycan lytic exotransglycosylase
35422	G→A	E684E	Phage DNA ejectosome component Gp16, peptidoglycan lytic exotransglycosylase
35455	C→T	L695L	Phage DNA ejectosome component Gp16, peptidoglycan lytic exotransglycosylase
35494	T→C	V708V	Phage DNA ejectosome component Gp16, peptidoglycan lytic exotransglycosylase
35506	T→G	L712L	Phage DNA ejectosome component Gp16, peptidoglycan lytic exotransglycosylase
35533	A→T	V721V	Phage DNA ejectosome component Gp16, peptidoglycan lytic exotransglycosylase
35535	A→G	D722G	Phage DNA ejectosome component Gp16, peptidoglycan lytic exotransglycosylase
36217	G→A	G949G	Phage DNA ejectosome component Gp16, peptidoglycan lytic exotransglycosylase
36226	T→C	D952D	Phage DNA ejectosome component Gp16, peptidoglycan lytic exotransglycosylase
36236	A→C	R956R	Phage DNA ejectosome component Gp16, peptidoglycan lytic exotransglycosylase
36265	G→A	G965G	Phage DNA ejectosome component Gp16, peptidoglycan lytic exotransglycosylase
36319	T→C	A983A	Phage DNA ejectosome component Gp16, peptidoglycan lytic exotransglycosylase
36323	G→T	A985S	Phage DNA ejectosome component Gp16, peptidoglycan lytic exotransglycosylase
36391	T→C	L1007L	Phage DNA ejectosome component Gp16, peptidoglycan lytic exotransglycosylase
36418	C→A	G1016G	Phage DNA ejectosome component Gp16, peptidoglycan lytic exotransglycosylase
36427	T→A	G1019G	Phage DNA ejectosome component Gp16, peptidoglycan lytic exotransglycosylase
36502	T→C	L1044L	Phage DNA ejectosome component Gp16, peptidoglycan lytic exotransglycosylase
36658	T→C	D1096D	Phage DNA ejectosome component Gp16, peptidoglycan lytic exotransglycosylase
36670	C→T	Y1100Y	Phage DNA ejectosome component Gp16, peptidoglycan lytic exotransglycosylase
37303	C→T	G1311G	Phage DNA ejectosome component Gp16, peptidoglycan lytic exotransglycosylase
37307	A→G	T1313A	Phage DNA ejectosome component Gp16, peptidoglycan lytic exotransglycosylase
37319	T→C	*1317Q	Phage DNA ejectosome component Gp16, peptidoglycan lytic exotransglycosylase
37452	C→T	Y18Y	tail fiber protein
37507	G→A	G37A	tail fiber protein
37519	A→G	I41V	tail fiber protein
37524	G→A	L42L	tail fiber protein
37578	G→T	L60L	tail fiber protein
37599	T→C	S67S	tail fiber protein
37785	T→C	G129G	tail fiber protein
37788	A→G	L130L	tail fiber protein
37800	C→T	N134N	tail fiber protein
37806	G insertion	A insertion	tail fiber protein
37811	T deletion	V138V	tail fiber protein
37832	C→T	A145V	tail fiber protein
37875	A→C	T159T	tail fiber protein
37920	A→G	A174A	tail fiber protein
37921	A→C	R175R	tail fiber protein
37927	C→T	L177L	tail fiber protein
37929	T→A	L177L	tail fiber protein
37938	A→C	I180I	tail fiber protein
37947	T→G	T183T	tail fiber protein
37969	T→A	S190T	tail fiber protein
37971	C→T	S190T	tail fiber protein
37977	G→A	A193A	tail fiber protein
37983	C→T	I195I	tail fiber protein
38986	C→T	T196T	tail fiber protein
37995	C→T	T199T	tail fiber protein
38001	G→A	A201A	tail fiber protein
38523	C→T	G375G	tail fiber protein
38526	T→A	S376S	tail fiber protein
38529	C→G	G377G	tail fiber protein
37533	C→T	L379L	tail fiber protein
37560	T→C	L388L	tail fiber protein
38568	A→G	G390G	tail fiber protein
38573	T→A	F392Y	tail fiber protein
38589	T→G	G397G	tail fiber protein
38598	C→G	V400V	tail fiber protein
38604	T→C	Y402Y	tail fiber protein
38607	T→C	Y403Y	tail fiber protein
38619	A→C	T407T	tail fiber protein
38621	T→G	A408A	tail fiber protein
38628	C→T	Y410Y	tail fiber protein
38670	T→C	S424S	tail fiber protein
38688	C→T	G430G	tail fiber protein
38691	A→G	V431V	tail fiber protein
38712	G→T	T438T	tail fiber protein
38718	C→T	V440V	tail fiber protein
38724	T→A	P442P	tail fiber protein
38727	C→A	R443R	tail fiber protein
38730	A→G	T444T	tail fiber protein
38751	T→G	L451L	tail fiber protein
38754	T→A	P452P	tail fiber protein
38772	T→C	N458N	tail fiber protein
38778	A→T	P460P	tail fiber protein
38781	G→A	A461A	tail fiber protein
38829	G→A	Q477Q	tail fiber protein
38832	T→C	G478G	tail fiber protein
38934	G→C	P512P	tail fiber protein
38953	G→A	D519N	tail fiber protein
38989	A→C	N531H	tail fiber protein
38998	A→G	N534D	tail fiber protein
39306	C→T	D636D	tail fiber protein
39364	G→A	A656T	tail fiber protein
39396	A→G	A666A	tail fiber protein
39511	A→C	R705R	tail fiber protein
39541	G→A	V715I	tail fiber protein
39548	A→T	Y717F	tail fiber protein
39745	A→C	R783R	tail fiber protein
39749	G insertion	P784P	tail fiber protein
39753	G→A	G785R	tail fiber protein
39757	G deletion	A787A	tail fiber protein
39759	C→A	A787A	tail fiber protein
39765	T→C	D789D	tail fiber protein
39803	C→T	N802N	tail fiber protein
39813	G→A	E 805E	tail fiber protein
39910	A→T	T838S	tail fiber protein
39912	A→G	T838S	tail fiber protein
39921	T→C	R841R	tail fiber protein
39954	T→C	G852G	tail fiber protein
39973	A→T	T859S	tail fiber protein
39978	A→T	G860G	tail fiber protein
40026	A→G	V876V	tail fiber protein
40110	G→A	A904A	tail fiber protein
40170	G→T	G924G	tail fiber protein
40212	T→A	A938A	tail fiber protein
40218	T→G	G940G	tail fiber protein
