# Supplementary material for: Characteristic, genomics and transcriptomics comparation of phages Kp84B and Kp84S infecting Klebsiella pneumoniae
Source: Research Square preprint supplement (doi:10.21203/rs.3.rs-7611342/v1), 2025-09-30
Supplement: Supplementary file 4 [file e37cd7bb44892fe696e8ffd8.xlsx]

## Sheet: B&S-1
Strains	KP84B	KP84S
Kp84	6	3
KP7-30	2	2
KP7-31	2	2
KP7-32	2	2
KP7-33	2	2
KP7-34	2	2
KP7-35	2	2
KP7-36	2	2
KP7-37	3	3
KP7-38	3	3
KP7-39	2	2
KP7-80	3	3
KP7-13	2	2
KP7-14	3	3
KP7-15	2	2
KP7-16	3	3
KP7-17	2	2
KP7-18	2	2
KP7-19	2	2
KP7-20	6	3
KP7-21	2	2
KP7-22	2	2
KP7-23	2	2
KP7-24	2	2
KP7-25	6	6
KP7-26	2	2
KP7-27	3	3
KP7-28	2	2
KP7-29	2	2
KP8-1	2	2
KP8-2	6	6
KP8-3	3	3
KP8-4	2	2
KP8-5	2	2
KP8-6	2	2
KP8-7	6	3
KP8-8	2	2
KP8-9	2	2
KP8-10	2	2
KP8-16	2	2
KP8-17	3	3
KP8-18	2	2
KP8-19	2	2
KP8-20	2	2
KP8-21	2	2
KP8-22	2	2
KP8-23	2	2
KP8-24	2	2
KP8-25	2	2
KP8-26	2	2
KP8-27	2	2
KP8-28	2	2
KP8-29	2	2
KP8-30	2	2
KP8-31	2	2
KP8-32	2	2
KP8-33	2	2
KP-YQ5	2	2
KP-YQ7	2	2
KP-YQ10	6	6
KP-YQ12	2	2
KP-YQ43	6	3
KP-YQ58	2	2
KP-YQ74	6	6
KP-YQ79	6	3
KP-YQ84	3	3
KP-YQ85	3	2
KP-YQ88	6	6
KP-YQ90	6	3
1125-1	3	3
1147-3	3	3
126	3	3
10-183	3	3
6-250	3	3
10-95	3	3
612	3	3
202	3	3
10	3	3
833	3	3
1413	3	3
6-310	3	3
4-252	3	3
436	3	3
1164-1	3	3
176464	3	3
50564	3	3
280764	3	3
KP7-80	3	3
3764	3	3
1364	3	3
14764	3	3
37-1LV38	3	3
11u105	3	3
11u107-3	3	3
14710-2	3	3
62914	3	3
214	2	2
65	2	2
067	2	2
8-105	2	2
8-202	2	2
226	2	2
12	2	2
4-51	2	2
231-1	2	2
7001	2	2
16601	2	2
231-2	2	2
23-1LV1	2	2
21591	2	2
12651	2	2
1660-1LV1	2	2
4-150	2	2
4-47	2	2
14710-1	2	2
7610	2	2
2210	2	2
58410	2	2
5610	2	2
8-334	2	2
8-375	2	2
3712	2	2
16312	2	2
5414	2	2
193914	2	2
4-155	2	2
6-221	2	2
4-195	2	2
1115	2	2
3715	2	2
203315	2	2
37-1LV15	2	2
04104	2	2
66016	2	2
1416	2	2
88216	2	2
68516	2	2
1119	2	2
1-1LV19	2	2
223719	2	2
96719	2	2
144	2	2
6-292	2	2
8-41	2	2
109	2	2
8-152	2	2
8-256	2	2
8-348	2	2
223	2	2
155	2	2
8-59	2	2
232	2	2
862	2	2
252	2	2
652-1	2	2
652-2	2	2
3752	2	2
3802	2	2
20262	2	2
8812	2	2
161	2	2
6-94	2	2
4-147	2	2
26820-1	2	2
42020-1	2	2
89320	2	2
26820-2	2	2
268-1LV20	2	2
42020-2	2	2
29021	2	2
32321	2	2
4-21	2	2
4-6	2	2
1122	2	2
3522	2	2
44922	2	2
3923	2	2
86923	2	2
28023	2	2
31423	2	2
8-322	2	2
1524-1	2	2
3724	2	2
124-1	2	2
1524-2	2	2
15u112	2	2
124-2	2	2
2924	2	2
149324	2	2
44224	2	2
12-42	2	2
4-42	2	2
6-129	2	2
1-117	2	2
1-18	2	2
1725-1	2	2
1125-2	2	2
49425	2	2
79225	2	2
1725-2	2	2
87525	2	2
13425	2	2
8-118	2	2
20027	2	2
1128	2	2
2028	2	2
8963-1	2	2
8963-2	2	2
3953	2	2
38330	2	2
19830	2	2
41630	2	2
1131-1	2	2
1131-2	2	2
43736-1	2	2
43736-2	2	2
3738-1	2	2
1738	2	2
2038	2	2
178638	2	2
3738-2	2	2
58438	2	2
20038	2	2
72238	2	2
1139	2	2
17u111	2	2
