# Supplementary material for: Characteristic, genomics and transcriptomics comparation of phages Kp84B and Kp84S infecting Klebsiella pneumoniae
Source: Research Square preprint supplement (doi:10.21203/rs.3.rs-7611342/v1), 2025-09-30
Supplement: Supplementary file 5 [file e427f460684fbd846eac8dae.xlsx]

## Sheet: Sheet1
contig_id	feature_id	type	location	start	stop	strand	function	aliases	figfam	evidence_codes	nucleotide_sequence	aa_sequence
Kp84S	fig|6666666.1391373.peg.1	peg	Kp84S_11_220	11	220	+	Phage holin, class II Gp17.5				atgttatccctagacttcaacaacgaagttatcaaggcggctcccattgcgggggtcgctggggctgacggtgtagcgaggctcttttggggcctctcactcaacgagtggttctacgtcgcggcaatcgcctacacagtggttcaaattggtgccaaggtagtcgacaaaatcattgactggaagaaagcaaacagaggttactcgtga	MLSLDFNNEVIKAAPIAGVAGADGVARLFWGLSLNEWFYVAAIAYTVVQIGAKVVDKIIDWKKANRGYS
Kp84S	fig|6666666.1391373.peg.2	peg	Kp84S_254_511	254	511	+	Phage terminase small subunit Gp18, DNA packaging				atggacctgattaaattcctcgaaatgttagacactgaaatggctcagcagatgctaatggacctgaagaatcccgagaagcgaacccctcagctgtacaacgccattggtaaactactggagcgacacaagttccaaatctctaagctgaccccagacgttaacatcttgggcggtctggctgagggtctggaggcttataactccaaggtgggtgcggatggtctgacagacgatgatgcgttcaccttacagtga	MDLIKFLEMLDTEMAQQMLMDLKNPEKRTPQLYNAIGKLLERHKFQISKLTPDVNILGGLAEGLEAYNSKVGADGLTDDDAFTLQ
Kp84S	fig|6666666.1391373.peg.3	peg	Kp84S_608_1054	608	1054	+	Phage Rz-like lysis protein Gp18.5				atgctggagttcacaaagagaatcgtcccgtatcttgtggctataatggtgtttgcctccgggtggcacttgggttcgcaatctacggacgctaaatggaaggaggtagtacagaatgaatacgtcaagaagcaaacggctagagctgaaactcagaaatcgattgacgcagtatcggctaagtaccaagcagaccttgaagggctggagggcagcactgataggattattgctgatttgcgtagcgacaataagcggctgcgcgtcagagtcaaacctaccagtgtcgccgcaggaccagacggtcgatgcctcgttgatggttccgtcgaactacacgaagcaactgctcgaagtcttatcgcaataacccagaaggccgacctcaaagagaaggcc…	MLEFTKRIVPYLVAIMVFASGWHLGSQSTDAKWKEVVQNEYVKKQTARAETQKSIDAVSAKYQADLEGLEGSTDRIIADLRSDNKRLRVRVKPTSVAAGPDGRCLVDGSVELHEATARSLIAITQKADLKEKALQDTIRKLQGKGGGH
Kp84S	fig|6666666.1391373.peg.4	peg	Kp84S_1051_2808	1051	2808	+	Phage terminase large subunit Gp19, DNA packaging				ttgagcaactcccagcaagccaagaacgccttaatcattgcgcaactgaagggtgactttgtcgcctttctcttcgtgctctggaaggccctgaacctgccggaaccgaccaagtgtcaaatcgacatggccaagtgtctggcggacccaaagaacaagaagtttatccttcaggctttccgtggtatcgggaagtcgttcatcacgtgtgcgttcgtagtgtggactctgtggcgtgaccctcagttaaagatactgatcgtctcagcctcaaaggaacgtgcggacgctaactccatcttcatcaagaacatcatcgacttgttgcctttcctgagtgagcttaagcctcgccccggtcagcgtgactccgtgattagctttgatgtaggccctgcc…	MSNSQQAKNALIIAQLKGDFVAFLFVLWKALNLPEPTKCQIDMAKCLADPKNKKFILQAFRGIGKSFITCAFVVWTLWRDPQLKILIVSASKERADANSIFIKNIIDLLPFLSELKPRPGQRDSVISFDVGPAKPDHSPSVKSVGITGQLTGSRADIIIADDVEIPGNSATQGAREKLWTLVQEFAALLKPLPTSRVIYLGTPQTEMTLYKELEDNRGYSTIIWPAQYPRSKEEDLYYGDRLAPMLRSEYDEDKEGLSSQPTDPVRFDSMDLQEREVEYGKAGYTLQFMLNPNLSDAEKYPLRLRDAIVCGLQADKAPMHYQWLPNRQNRNEELPNVGMKGDEIYSFHTASSNTGAYQGKILVIDPSGRGKDETGWCILYTLNGYIYLMDAGGTRGYEE…
Kp84S	fig|6666666.1391373.peg.5	peg	Kp84S_2818_3252	2818	3252	+	Phage protein Gp2.8/Gp7.7 contains HNH endonuclease motif				atgtttgacgtgaggtatgacccggatgtgccggggtgcctctctaactctaagggtgagcaactcgcagttctacaaggagaatacttcaagtggaacggcgggagtgctcatcgtattgtatgggaaggcttcaatggtaggataccagacggttacatggttgaccatataaaccgcaacaagcaggacagtcggatagagaacctacgactggtcactcggtcccagaatgtccataactccaagcgcgagagggctgatgggatgcccaaaggaattacagcacgacagcgggactttaggattctggtccataaggattgtaagaagtacgtaaggtacgcaccgacacttgcggaagccataaaggtccgcgaggagcttgtagagtccttg…	MFDVRYDPDVPGCLSNSKGEQLAVLQGEYFKWNGGSAHRIVWEGFNGRIPDGYMVDHINRNKQDSRIENLRLVTRSQNVHNSKRERADGMPKGITARQRDFRILVHKDCKKYVRYAPTLAEAIKVREELVESLGLSAYYVDSVA
Kp84S	fig|6666666.1391373.peg.6	peg	Kp84S_4206_4544	4206	4544	+	hypothetical protein				atggctaataactatatacataaagagataaaccttaagacacttaaagacaatggctatgaggtgactacagagggtcaagtgataagccataaagggagagtaccacgcgtcttgaagtcgcctgtgggttctcatggctaccgtgtggtaaacctgaggttagacggtaagtcgtccatgttctgcgtccataggttggtagcttatagttacctaacgattgatgaggataggcagctggtcaatcataaggatggcgacaagaccaataacactctgaataacttagagtttgttacgcacagtgaaaaatatatcacattattatcaaaataa	MANNYIHKEINLKTLKDNGYEVTTEGQVISHKGRVPRVLKSPVGSHGYRVVNLRLDGKSSMFCVHRLVAYSYLTIDEDRQLVNHKDGDKTNNTLNNLEFVTHSEKYITLLSK
Kp84S	fig|6666666.1391373.peg.7	peg	Kp84S_4886_5032	4886	5032	+	Phage protein				atgattaagtatggcatcactctggaagacctgaagtattaccgattcgctctcatgcacggtaaacaccacgactacctaatggcccaactggcccagacctaccgcgcacgcaaggtaatgtatggtaaccctgttcgtaattag	MIKYGITLEDLKYYRFALMHGKHHDYLMAQLAQTYRARKVMYGNPVRN
Kp84S	fig|6666666.1391373.peg.8	peg	Kp84S_5010_5207	5010	5207	+	Phage protein				atggtaaccctgttcgtaattagtgtgtacgccctgagtgtcctgtactttgtgcgggactttcgcaagggtctcaaggtgcacaaagcatcattcagttacatgaagtggggcgtgctgcctcgctttactgtacggctacctaatggccgctttaaggccaacaaagtggggatattctatgtcgcaacatactaa	MVTLFVISVYALSVLYFVRDFRKGLKVHKASFSYMKWGVLPRFTVRLPNGRFKANKVGIFYVATY
Kp84S	fig|6666666.1391373.peg.9	peg	Kp84S_5459_6472	5459	6472	+	Phage serine/threonine kinase involved in host transcription shutoff Gp0.7				atgaactacaccgacatgttagaacgcttagacgtcatccgtaacctgccaatctgtgaactcgacaagcgccagccgctgctggttgcactcatcgcagacatagtgaactgcgagacgtccgacggtgacgatacggatagcgatcggggtctggagcgtcaggactattggcaaaccttgaagattaaggccaaagacgctgggtttaacctgctgggcaatggccacttcagcgcagcgtttaagcacgagctgctaccgggtagggtcattaaggttggctttaagaaagaagacgcaggggccgcctacgtggctttctgccggatgcaccaaggtaaggtagggatacctaacgtctatcacgtagcgcgtcacgctgggtgctacacggtg…	MNYTDMLERLDVIRNLPICELDKRQPLLVALIADIVNCETSDGDDTDSDRGLERQDYWQTLKIKAKDAGFNLLGNGHFSAAFKHELLPGRVIKVGFKKEDAGAAYVAFCRMHQGKVGIPNVYHVARHAGCYTVVLDELEPCKRRFNATHEHYADLANYFVENSDAELGDVDGAEKELPFVETCKMINKFFYGIASFDMHSGNIMFTKDGKPVITDPVSFSADRDREPFSLEPEDLLAEIEQIAHDKMIERCKRNKAKRDRDSTLCRARRANNKARRNRVKAAARWRKEYEKRDAEILKEGLAKIEERILAWQVGHGLAIQQGKPLPIDNYLQGRLMG
Kp84S	fig|6666666.1391373.peg.10	peg	Kp84S_6543_9263	6543	9263	+	Phage DNA-directed RNA polymerase (EC 2.7.7.6)				atgaacgcattaaacattgcacgtaatgacttctcagagattgaactagccgctattccgtacaacatcctcagcgagcactacggggacaagctggcacgtgagcagttagcactggaacatgaagcgtatgagctgggcgagcagcgtttcctgaagatgttagagcgtcaggtgaaagctggcgagttcgctgacaacgtggccgcgaagccgctggtcataacgttgcacccacagctgaccaagcgcattgacgactggaaggaggagcaagcaagcgcacgcggtaagaagcctcgcgcatactacccgattaagcatggtgtaccctcagagttggcccttagcatgggcgctgaggtgctcaaagagaagcgtggtgtatccagcgaggca…	MNALNIARNDFSEIELAAIPYNILSEHYGDKLAREQLALEHEAYELGEQRFLKMLERQVKAGEFADNVAAKPLVITLHPQLTKRIDDWKEEQASARGKKPRAYYPIKHGVPSELALSMGAEVLKEKRGVSSEAIALLTIKVVLGTLTDASKATIQQVSSQLGKALEDEARFGRIREQEAAYFKKNVADQLDKRVGHVYKKAFMQVVEADMISKGMLGGDNWASWKTDEQMHVGTKLLELLIEGTGLVEMTKNKMADGSDDVTSMQMVQLSPAFVELLSKRAGALAGISPMHQPCVVPPKPWVGTVGGGYWSVGRRPLALVRTHSKKALRRYEDVHMPEVYKAVNLAQNTPWKVNKKVLAVVNEIINWKHCPVGDVPAIEREELPPRPDDIDTNEVARKA…
Kp84S	fig|6666666.1391373.peg.11	peg	Kp84S_9362_9538	9362	9538	+	Phage protein				atgtatcagaacacaatcaacttcgagcgcaaccgtgaacgtcagcagaccgagggttacatccctaaaggccgcaagctgaacaagacaaagcgtggtggcggcgttaagggttccttccgtaacgccaagggtgacagcgttgttaaccaagagaaatacttcgtaggagcataa	MYQNTINFERNRERQQTEGYIPKGRKLNKTKRGGGVKGSFRNAKGDSVVNQEKYFVGA
Kp84S	fig|6666666.1391373.peg.12	peg	Kp84S_9542_9799	9542	9799	+	Phage protein				atggctactgaaaaaagatggcttttcgatgggagcacctcacaatggtctcgtttaggagcagcggagcgtagactactggatacgacaggcctgcacgtggtcatgcttgacgaccacttcactaacaccgtgctgttcaacgtattcgagccacgcgggtcacttctaataagtaatcggttcagccactggtcgattgactcagcgtcagactggctggcaaaactcacagccgactactcaagttggaaatga	MATEKRWLFDGSTSQWSRLGAAERRLLDTTGLHVVMLDDHFTNTVLFNVFEPRGSLLISNRFSHWSIDSASDWLAKLTADYSSWK
Kp84S	fig|6666666.1391373.peg.13	peg	Kp84S_9900_10913	9900	10913	+	Phage-associated ATP-dependent DNA ligase (EC 6.5.1.1)				atgatgaacattaagactaatccatttaaggccgtatcgttcgttcgctctgctatcgagaaggcgctggagacttccggttaccttattgcagacactaagcacgatggcgtacgcgggaacatttgcgtagacaacacagccaacgcagcgtggctaagccgggtatccaagaccattccggcgcttgagcacctcaacggtttcgaccagcgctggcagaagttactgaaggatgaccgctggattttccctgatggctttatgcttgatggggaactcatggtcaaaggtgtggactttaacaccgggtctggcctcctgcgcaccaagtacatcaaagccaagaattatgacttccacaatagtgactgggacctcaaggataagaaagcaccc…	MMNIKTNPFKAVSFVRSAIEKALETSGYLIADTKHDGVRGNICVDNTANAAWLSRVSKTIPALEHLNGFDQRWQKLLKDDRWIFPDGFMLDGELMVKGVDFNTGSGLLRTKYIKAKNYDFHNSDWDLKDKKAPFHLDPEHLKVVLYDIIPLDIIESGDDYNVMTLLRLEHVKVALPVLQDHFPEIDWCLSESREVYDMDELDALYRQKREEGHEGLVVKDPRGIYKRGKKSGWFKCKPNDEADGIIQGVNWGTPGLANEGKVIGFSVLLETGRLVDANNISRALMDEFTANVKEHGEEYYNGWSCQIDYMEETKDGSLRHPSFTCFRGTEDNPSEKI
Kp84S	fig|6666666.1391373.peg.14	peg	Kp84S_11196_11071	11196	11071	-	hypothetical protein				atgtttctcaccgcttacacaatgggacctgactttgctatttgcattgttgacgctggtggttacagctctcaggttttcaatgcgattgtcgctagggtctctattaatatggtctatcactag	MFLTAYTMGPDFAICIVDAGGYSSQVFNAIVARVSINMVYH
Kp84S	fig|6666666.1391373.peg.15	peg	Kp84S_11423_11686	11423	11686	+	Phage protein Gp1.6				atgcgcttacacttcaataaatccaacggtatcttctcggttcgccgggaggaccgcagcactgtagcagccactgagcgccacggtaagattccacgtatcggcgacaccttcgagctggcacccagcgttcacatcttggttactagcggtctctacgaattggctcagactaagagccgtcctttcgtacccgttgtggtaaccaagtggccacgccttcgtctgttctgggagcgcattaaggaggtcgtaaatgactga	MRLHFNKSNGIFSVRREDRSTVAATERHGKIPRIGDTFELAPSVHILVTSGLYELAQTKSRPFVPVVVTKWPRLRLFWERIKEVVND
Kp84S	fig|6666666.1391373.peg.16	peg	Kp84S_11679_12104	11679	12104	+	Phage nucleotide kinase Gp1.7, phosphorylates dGMP to dGDP and dTMP to dTDP				atgactgaacgtgaaattcaagtggtggacctactggttgaacaaaacactgaccggcaagactccacaacgtgcgctgatggcgtcatatgctacaaggtatcgtgcagtaagtgtccgctagacaccaaaggtacgaccattggggaagtccgcgcaatgaagggcagcaaggctcctagtgtagaagatgacggcgttaagcaaccaagtcactaccagctgttcggaggcatcgaggccattgaggtgattgctcgcagtatgactcaggagatgttcaaagggtactgcctcgggaacatcctcaagtaccgccttcgggccgggaagaagtccgagctggctaccttagagaaagacatggcgaaggccgctttctatctggaactttacgag…	MTEREIQVVDLLVEQNTDRQDSTTCADGVICYKVSCSKCPLDTKGTTIGEVRAMKGSKAPSVEDDGVKQPSHYQLFGGIEAIEVIARSMTQEMFKGYCLGNILKYRLRAGKKSELATLEKDMAKAAFYLELYEKHKGLCHD
Kp84S	fig|6666666.1391373.peg.17	peg	Kp84S_12097_12234	12097	12234	+	hypothetical protein				atgattgagttaacaccgagtcgtattgaaatcctgaagtattgggccaaggacttcctcagtatctaccagactgagtacttcaccaaggaggagcttgagttcattgaggagattctcagccatgaacccgagtga	MIELTPSRIEILKYWAKDFLSIYQTEYFTKEELEFIEEILSHEPE
Kp84S	fig|6666666.1391373.peg.18	peg	Kp84S_12221_12346	12221	12346	+	Phage protein Gp1.8				atgaacccgagtgactggtgccgcgagatgtacgagaagacgctcgaccctgcgtacatcaccctgtataacatgtggaaggagtgggaagatgcaaaagttcgttgtaacggtcgagacagctaa	MNPSDWCREMYEKTLDPAYITLYNMWKEWEDAKVRCNGRDS
Kp84S	fig|6666666.1391373.peg.19	peg	Kp84S_12312_12461	12312	12461	+	Phage protein Gp2, bacterial RNA polymerase inhibitor				atgcaaaagttcgttgtaacggtcgagacagctaacgcatcgtatgaactcccggtgtacgctgggtctcttgaggagaccctagaagttgccgaggcggagtacgaagagttaggccaagtgactcgggtacgcccagatagtcattag	MQKFVVTVETANASYELPVYAGSLEETLEVAEAEYEELGQVTRVRPDSH
Kp84S	fig|6666666.1391373.peg.20	peg	Kp84S_12521_13216	12521	13216	+	Phage single-stranded DNA-binding protein Gp2.5				atggcattcgctaagaagaagatttataccaccaagattggtacctgtgagccgtatgcttacttcaacaagccggactatggcggtgagggttttgagaacccacgcggtacctacaaaggttccgtaacgttcaagaacgaagactgtcaggagctggtagacctcatcgttaagacccatgaggaaaactacgcggcccgtctggaagctcacgaagcgaacccgccgaaggttcagaagggcaagaaaccactgaagccgtacgaaggcgacatgccgttcttcgacaatggtgatggaaccaccacgttcaacttcaagtgctacggttcgtacgaggacaagaagactggcgagaccaagaagattgttctgggcgtagtagacgcgaagggc…	MAFAKKKIYTTKIGTCEPYAYFNKPDYGGEGFENPRGTYKGSVTFKNEDCQELVDLIVKTHEENYAARLEAHEANPPKVQKGKKPLKPYEGDMPFFDNGDGTTTFNFKCYGSYEDKKTGETKKIVLGVVDAKGKRIQDVPIIGGGSKVKIRFSLVPYGWSAVAGASVKLQLEGVMLVELATFGGGEDDWADEAVEGGYEADESRSRKPQEDPEDWSGEEADEGEAEEDDDF
Kp84S	fig|6666666.1391373.peg.21	peg	Kp84S_13216_13665	13216	13665	+	Phage endonuclease I (EC 3.1.21.2), four-way DNA junctions resolving				atggcaggctatggggccaaagggattcggaaggtgggtgccttccggtctggccttgaggacaaggtgtccaagcagttagaagcaaagggcgtcacgttcgactacgaattgtggcgcatcccttacgttattcctgcgagtgaccacctttacactcccgacttcttgcttcctaacggaatcttcgtggagactaagggtctctgggaagccgaggaccgcaagaagcacctactgattcgtgagcaatacccggagttagacatccggttagtgttctcatcgagtcgcactaagatttacaaagggtcgcccaccagttacgctgagtggtgtgagaagcataacatcttgtttgccgacaaattgattcccgtagactggctgaatgagccg…	MAGYGAKGIRKVGAFRSGLEDKVSKQLEAKGVTFDYELWRIPYVIPASDHLYTPDFLLPNGIFVETKGLWEAEDRKKHLLIREQYPELDIRLVFSSSRTKIYKGSPTSYAEWCEKHNILFADKLIPVDWLNEPKRDVQFGKFKQKKGAK
Kp84S	fig|6666666.1391373.peg.22	peg	Kp84S_13665_14102	13665	14102	+	Phage protein Gp2.8/Gp7.7 contains HNH endonuclease motif				atgattcaccccaaacttgagatagtgcctaccgattcctgcatcgaatggacaggagcgcaccacaagaatggatacggagtcatctcccttaaccgcaaggttgcccacgagctgggcgtgtcgcgtgtacagttcgtccaccgagcgtcatacatacagcacaagggacccattcctagtgggcttgtagtccgccatacgtgcgacaataagcgctgctataaccctgagcatttgctgcttgggacacagaaagataatgcagacgacgctgtggagcgcggcctgtctaaacgaaaactaaccgatgcagatgtggaggtaatacgctcatccagtgaatctaacaggaagttaggtaaatactatggagtcagtgcaacaactatctatcac…	MIHPKLEIVPTDSCIEWTGAHHKNGYGVISLNRKVAHELGVSRVQFVHRASYIQHKGPIPSGLVVRHTCDNKRCYNPEHLLLGTQKDNADDAVERGLSKRKLTDADVEVIRSSSESNRKLGKYYGVSATTIYHIKHGTKWRHVNA
Kp84S	fig|6666666.1391373.peg.23	peg	Kp84S_14095_14550	14095	14550	+	Phage endolysin			isu;Phage_lysis_modules	atgcctaaggtacaattcactaaacgaaaggagacctatcagattttcgtacactgctccgcaaccaagccgtctatggacattggtgtccgggagattgctcagtggcacaaggagcagggatggttagcaattggataccactttgtgattcgtcgtgatggcaccgtcgaggcgggccgtgaccaagatgctgtgggttctcacgtcaagggatacaactcgacttctgtcggtgtgtgtctggtgggcggtatcgacgcgaagggtaaccccgaggcaaacttcacgccagcccagatgcagtctctgcgttcactgctggtagaactgaaggtgcaatactccggggctgtgctaatggcacatcacgatgtggcacctaaagcctgtccaagc…	MPKVQFTKRKETYQIFVHCSATKPSMDIGVREIAQWHKEQGWLAIGYHFVIRRDGTVEAGRDQDAVGSHVKGYNSTSVGVCLVGGIDAKGNPEANFTPAQMQSLRSLLVELKVQYSGAVLMAHHDVAPKACPSFDLKRWWEKNELVTSDRG
Kp84S	fig|6666666.1391373.peg.24	peg	Kp84S_14844_15032	14844	15032	+	Phage protein Gp2.8/Gp7.7 contains HNH endonuclease motif				gtgtgggaagcagctaatgggcctatccctgacgggtattacatagaccacattgacggcaatccactcaacgatgacctgagcaacttacgcttggcgcttccgaaagagaactcatggaacatgaagactccgaagagtaacaagacagggctgaaaggtttatcgtggaaggctagtcatgagtag	MWEAANGPIPDGYYIDHIDGNPLNDDLSNLRLALPKENSWNMKTPKSNKTGLKGLSWKASHE
Kp84S	fig|6666666.1391373.peg.25	peg	Kp84S_15133_16851	15133	16851	+	Phage primase/helicase protein Gp4A				atggacaattcgctagattcagatagtgttttcctttatcacataccttgcgagcattgtggctcatcagatgggaactccctgttctcggatggacaccaatactgctacgtgtgtgagaaatgggtgccgggcgatgaccaaaagcgctcggagattaccaacagaagacccaaaggagggaattacgggatgaatacgcaaggtgcaggtttattggtattcggtgagagtgatggtcggtacactgacctgacagctcgaggtatctcgaaggcaacgtgccagaaggccgggtactgggttgccaaggtccgtggtgcagcctaccaagtggctgactatcgggaccagaatggctccatcgtctctcagaagttgcgggacaaggagaagaac…	MDNSLDSDSVFLYHIPCEHCGSSDGNSLFSDGHQYCYVCEKWVPGDDQKRSEITNRRPKGGNYGMNTQGAGLLVFGESDGRYTDLTARGISKATCQKAGYWVAKVRGAAYQVADYRDQNGSIVSQKLRDKEKNFSTRGSHKGDALFGKHLWNGGKKIVVTEGEIDMLTVMQLQDCKWPVVSLGHGASAAKKTCSANYEYFDSFDQIILMFDMDDPGRAAIEEAAQVLPPGKVHVAVLTEKDANECLLKGKGKEVLDQIWNAAPWVPDGVIGAMSMKDRVREAMTSEQSVGYLFSGCPGLNDRTLGARGGEVIMVTSGSGMGKSTFVRQQALGFARGQGLRVGMAMLEESVEETMEDVLGIANGIRLRQQPREFKRKLIEDGTYDKWFDELYGTDQFHLY…
Kp84S	fig|6666666.1391373.peg.26	peg	Kp84S_16950_17159	16950	17159	+	Phage protein Gp4.3				atgtttaaactcatcgaaactttaggccgtctggtcgtcgcactgtacatccgtgaagccaaggcactggacaaagcgtccaaggtggaagcggaagcagccgctaagctggctaaagcagccgacaaggcacgtcaggcatctctggatgcaaccgcagaggcagcgaaagttgcacttaaagctcagaaacttaaggagttcttctaa	MFKLIETLGRLVVALYIREAKALDKASKVEAEAAAKLAKAADKARQASLDATAEAAKVALKAQKLKEFF
Kp84S	fig|6666666.1391373.peg.27	peg	Kp84S_17159_17470	17159	17470	+	Phage protein Gp4.5, inhibitor of host toxin/antitoxin system				atgactaccaaagctaaattccccggcaataccattcagctgtccgacactgtagaccagtggggccgtaaggttcacatcaacgttcgcaatgataaggttactctggtctaccgctggaaggccaagagcgataaccgtgcgcacactcagcgtgtgaccctcgacgatactcaagcagctcgcctgctggcatctgtggctgtagcagcagctgtaactgtcggtgaggacaaagtgcgtgacgccattctgagtaaagaggttggagaaacctccatgcgactggccgcagcgtcagggcttaagtga	MTTKAKFPGNTIQLSDTVDQWGRKVHINVRNDKVTLVYRWKAKSDNRAHTQRVTLDDTQAARLLASVAVAAAVTVGEDKVRDAILSKEVGETSMRLAAASGLK
Kp84S	fig|6666666.1391373.peg.28	peg	Kp84S_17741_19855	17741	19855	+	Phage DNA-directed DNA polymerase (EC 2.7.7.7)				gtgctagttacagacatcgaggcgaacaacctcttagagaaagtcactcagttccactgcggtgtcatttatgactacagcacggacgagtacgtatcgtatcgaccttgggacttctcagcgtatctcgatgcgttggaagctgaggtggctcgtggtggtctcatcgtattccacaacggtcacaagtacgatgccccagtgttgacaaagctggctaagcaccagttaaaccgagagttccacctgccgcgtgagaacgtagtggacacgttggtacttagccgtttgctttttgcgaacattaaggacacagacatggccttgctgcgttccggtagattacccggtaagcgcttcgggtctcacgctctggaggcgtggggttaccgcttaggc…	MLVTDIEANNLLEKVTQFHCGVIYDYSTDEYVSYRPWDFSAYLDALEAEVARGGLIVFHNGHKYDAPVLTKLAKHQLNREFHLPRENVVDTLVLSRLLFANIKDTDMALLRSGRLPGKRFGSHALEAWGYRLGEMKGEYKDDFKKLLEEQGEDYVDGAEWISFNEPMMAYNVQDVVVTKALLENLLSDKHYFPAGIDFTDVGETTFWSESCEAVWLEHRAAWLLAKQERNGFPFNTKAIEELYVELAGRRSELLQTLTDTFGTWYQPKGGTELFLHPRTGKPLGKYPRVKYPKQGAIYKKPKNKAQREGREPCELDTRDYVEGAPYTPVEHVVFNPSSRDHIALKLKEAGWVPTEFTDKGAPKVDDEVLEHVRVEDPEKQRCIDLIKEYLMIQKRIGQA…
Kp84S	fig|6666666.1391373.peg.29	peg	Kp84S_19874_20158	19874	20158	+	hypothetical protein				atggctattaccaagcgttgtatcgtaagcttcgacatgaagtttgtggcttctagtaaagatgtggaaggttacaccaagcgtatgctggacgtgtcccgtaaggttgctaacggggagaaggtgtcaggcatagagctggaactagcacgtgttgccgttactgaaggtatcgaagcgtccattgagctatccatgaagtcagccattgttggccgactgaaggatgagctgcgagagcctcaggtgtcgtgtggtaacttccgggtggggttcaagcgatga	MAITKRCIVSFDMKFVASSKDVEGYTKRMLDVSRKVANGEKVSGIELELARVAVTEGIEASIELSMKSAIVGRLKDELREPQVSCGNFRVGFKR
Kp84S	fig|6666666.1391373.peg.30	peg	Kp84S_20155_20364	20155	20364	+	Phage protein Gp5.7				atgagtgagtatctcaaagttctggcggccctcaagggctgccccaagtccttccagtcgaactacgtgcggaacaacgctgcgttagtcgctgaggctgcgagccgtggtcacatttcgtgcctgaccatgagtggtcgtaatggtggcgcttgggaaattaccagtgccggagtgaaattccttaagacccatggaggttgcttatga	MSEYLKVLAALKGCPKSFQSNYVRNNAALVAEAASRGHISCLTMSGRNGGAWEITSAGVKFLKTHGGCL
Kp84S	fig|6666666.1391373.peg.31	peg	Kp84S_20361_20744	20361	20744	+	hypothetical protein				atgagtaagttaacagataacgttaaaggttacgtgaaggagctaggtgagcgtgagaccgagcatcgtaagtattcatcgttttaccttacgatttccttgaaggttaccgagagtgacgctgagaacgaagaagaacttctcccgtacgttggtaaagagattgtcgctaatggaatgtgggatgacacttgtggtgatgagatttatgactggaaagtattctctgtggagacctctgaggaagatacagaggctcgttcagagttccgtgagttactctctcatctcaacgctgaggacaacagtatggccctagacttccttgagaagcaccttaagcccaaactggtggagaatcgggtggaggttcaccatgagtaa	MSKLTDNVKGYVKELGERETEHRKYSSFYLTISLKVTESDAENEEELLPYVGKEIVANGMWDDTCGDEIYDWKVFSVETSEEDTEARSEFRELLSHLNAEDNSMALDFLEKHLKPKLVENRVEVHHE
Kp84S	fig|6666666.1391373.peg.32	peg	Kp84S_20737_20913	20737	20913	+	Phage protein				atgagtaagcggatggtgttcgtacacccgttggaacctaaatcacactgggaaactgctggcggcatcgtctggttttataaggatggttacatgctgcggcagtcccatgtcacccacaaggaccttcacgacccgaagatgggttttaaattcaaggagttaacgaatgagtaa	MSKRMVFVHPLEPKSHWETAGGIVWFYKDGYMLRQSHVTHKDLHDPKMGFKFKELTNE
Kp84S	fig|6666666.1391373.peg.33	peg	Kp84S_20906_21811	20906	21811	+	Phage exonuclease (EC 3.1.11.3)				atgagtaagcacacattgttatccttcagtgactaccgggcaacccagaagattgccaaaggtgtccttgtgatggatggtgactggttggtattccaagccatgagtgccgctgagttcgatgcctcgtgggaggaggagatttggcagcgttgctgtgaccacgctaaggcccgagagattctggagaactccatcgagtcctacaagggccgcaagaaggcatggaaaaacgccgatgtagtcctagcgttcaccgaccgtgtcaactggcgtaagctgctggtggacccaacgtacaaagagaaccgagctgtcactaagaagcctgtgggttacttcgagttccttgagtccgtctttgagacctacacgtgcgtccttgagcctcagctcgaa…	MSKHTLLSFSDYRATQKIAKGVLVMDGDWLVFQAMSAAEFDASWEEEIWQRCCDHAKAREILENSIESYKGRKKAWKNADVVLAFTDRVNWRKLLVDPTYKENRAVTKKPVGYFEFLESVFETYTCVLEPQLEGDDVMGIIGSNPLQFNYEKAVLVSCDKDFKTIPDCDFLWCTTGNILVQTRETADYWHLFQTIKGDITDGYGGIPGWGDTAEDFLKEPFIVEPVTSVLKSGKNKGQEVTKWVKRAPEAGETLWDCIKSIGAKAGMTEEEVIKQGQMARILRSDEYNIETGEITLWQPGS
Kp84S	fig|6666666.1391373.peg.34	peg	Kp84S_21793_21903	21793	21903	+	Phage protein Gp6.3				atggcaaccgggcagctgattctcattgtcccgaccatgggcttagtcgctcgcggtctctggatgttagccttgattatcaagcagatagttgagcacaaagagaagtga	MATGQLILIVPTMGLVARGLWMLALIIKQIVEHKEK
Kp84S	fig|6666666.1391373.peg.35	peg	Kp84S_21990_22235	21990	22235	+	Phage protein Gp6.5				atgttaaaacctatagagcacatccttaacaatcctaatgaccttcctgacgtaccgcgagctgtcaaggagtacctacagtctcgcttcaatgctgacttcctgtatcagtcagaggtccgtaagttgcgtgaggctggccacagtgaggagttcatctccggcgtactgtatggtcaccacatggcttcacgtgtccttgatgagatggagggacgccagcgtgcactcaaagaaggagattga	MLKPIEHILNNPNDLPDVPRAVKEYLQSRFNADFLYQSEVRKLREAGHSEEFISGVLYGHHMASRVLDEMEGRQRALKEGD
Kp84S	fig|6666666.1391373.peg.36	peg	Kp84S_22238_22459	22238	22459	+	Phage virion protein Gp6.7 ejected into infected cell				atgtgtttctcgcctaagatgaaagcacctaaggttgacacgacgaccgtccctgagccagcgccacttactgaggaacctaagggtatccagtacggtggtgaagagggctcaaacagcaccactcctgaggtgtctggtcgtaagtcactcaaggtggccaagacgacagagcctacagggtccggtagtaaaatccgtaagtcagctttaggaggctaa	MCFSPKMKAPKVDTTTVPEPAPLTEEPKGIQYGGEEGSNSTTPEVSGRKSLKVAKTTEPTGSGSKIRKSALGG
Kp84S	fig|6666666.1391373.peg.37	peg	Kp84S_22461_22721	22461	22721	+	Phage virion assembly protein Gp7.3 ejected into infected cell				atgggactgttcaagaaaatcaagaaggctatctccaaggtagtcaaggcaccactcaaggcagtgggtctggcagcagatgcacctaacgtgcaggcagccgctgagacacctgtggccgcacctaaggaagcaccgaaagaggtcgtggaggacgttgaatcttcagcagacactgagtctggtaagaagaaaactcgtgcgtccggcaagaagtccctctcagtttcccgcagctcaggcggtgggattaacttatga	MGLFKKIKKAISKVVKAPLKAVGLAADAPNVQAAAETPVAAPKEAPKEVVEDVESSADTESGKKKTRASGKKSLSVSRSSGGGINL
Kp84S	fig|6666666.1391373.peg.38	peg	Kp84S_22745_24352	22745	24352	+	Phage collar, head-to-tail connector protein Gp8				atggcagaagttaaactcgaaggcttcgcagaggaaggagccaaggcggtatacgaccgtctgaagaacgaccgacagccttacgagacacgagcagagtcctgtgcgcagtacacgattccctcgctgttccctaaggactccgataacgcatcaaccgattacacaactccgtggcaatccgtaggtgctcgtggcctgaacaacctagcgtccaaactgatgctggccctgttcccgatgcagtcatggatgaagctgaccattagtgagtacgaagcgaagaaccttctgggtgacgctgagggtctcgccaaggtcgatgagggtctctcaatggtagagcgaatcatcatgaactacatcgagtccaatagttaccgagtgactctctttgag…	MAEVKLEGFAEEGAKAVYDRLKNDRQPYETRAESCAQYTIPSLFPKDSDNASTDYTTPWQSVGARGLNNLASKLMLALFPMQSWMKLTISEYEAKNLLGDAEGLAKVDEGLSMVERIIMNYIESNSYRVTLFECLKQLCVAGNALLYLPEPEGYTPMKLYRLNSYVVQRDAFGNVLQIVTLDKIAFNALPEDVRSQVEAAQGEQKEDAEVDVYTHVYLNEAGDGYLKYEEVAEEVVPGSEAEYPLEECPYIPVRMVRIDGESYGRSYVEEYLGDLKSLENLQESIVKMAMITAKVIGLVDPAGITQVRRLTAAQSGAFVPGRKQDIEFLQLEKSGDFTVAKNVSDTIEARLSYAFMLNSAVQRTGERVTAEEIRYVASELEDTLGGVYSILSQELQLPL…
Kp84S	fig|6666666.1391373.peg.39	peg	Kp84S_24456_25415	24456	25415	+	Phage capsid assembly scaffolding protein Gp9				atggctggcgaatctaacgcagacgtatatgcatccttcggtgttaacagtgctgtactgactggtagcacacctgaggagcaccaagaaaacatgttggctcttgatgttgctgcccgtgatggcgatgatgcaatcgagctgaacaccaacagtgatgacccgtatggttccgatgtggacccgttcggtgaacctgaagagggccgtatgcaggtccgcatctccgctgacggttccggcgaagagtctaccgaaggtgaagagggttctgaagaagaacagcagggcgacgatgagaggcagccggaggaagtaaccgaagaaggtgagcctgaagagttcaagcctattggcgaaactccggctgacatcaatgaagcctctcagcagctggaa…	MAGESNADVYASFGVNSAVLTGSTPEEHQENMLALDVAARDGDDAIELNTNSDDPYGSDVDPFGEPEEGRMQVRISADGSGEESTEGEEGSEEEQQGDDERQPEEVTEEGEPEEFKPIGETPADINEASQQLEEHEAGFNDMVATAIERGLSQDAVTRIQQEYQNEDSLSDESYKELAEAGYSKAFVDAYIRGQEALVNQYVDKVMDFVGGRERFQQVYGHMQTNNPEGAEALIKAFESRDVATMKTILNLAGQSRDKTFGKKAERTITKRATPAKPVARKAEGFESQAEMIKAMSDPRYRTDSKYRSEVEQKVIDSKF
Kp84S	fig|6666666.1391373.peg.40	peg	Kp84S_25641_26675	25641	26675	+	Phage major capsid protein Gp10A				atggctaacatgcaaggtggacagcagctcggtactaaccaaggtaaaggtcaatccgcagcagacaagctggcgctattcctgaaagtattcggcggtgaagtcctgaccgcattcgctcgtacctctgtgacctctaaccgccacatgcagcgtcaaatcagctccggtaagtccgcacagttccctgtgattggtcgcaccaaggctgcttacctgcaaccgggcgagtctctggatgacaaacgtaaagacatcaagcacaccgagaagaccattaacattgatggcctgctgactgcggacgtgctgatttacgacatcgaagacgcgatgaaccactatgacgtgcgctccgagtacacctctcagattggtgaatctctggcgatggcagct…	MANMQGGQQLGTNQGKGQSAADKLALFLKVFGGEVLTAFARTSVTSNRHMQRQISSGKSAQFPVIGRTKAAYLQPGESLDDKRKDIKHTEKTINIDGLLTADVLIYDIEDAMNHYDVRSEYTSQIGESLAMAADGAVLAELAGLVNLADSVNENIAGLGKPSLLEVGAKADLTDPVKLGQAVIAQLTIARAALTKNYVPANDRTFYTIPDVYSAILAALMPNAANYAALIDPERGSIRNVMGFEVVEVPHLTAGGAGDDRPDEGAEATNQKHAFPATGGKVNKENVVGLFQHRSAVGTVKLKDLALERARRAEYQADQIIAKYAMGHGGLRPESAGALVFKASA
Kp84S	fig|6666666.1391373.peg.41	peg	Kp84S_26856_27434	26856	27434	+	Phage non-contractile tail tubular protein Gp11				atgaacatgcaagatgcttactttgggtctgccgctgagctggatgcagtcaacgagatgctcgcagccatcggtgaatcccctgtgaccacccttgacgaagatggtaacgcagacgtagcgaacgctcgtcgtatcctcaacaggattaaccgccagattcagtctaaaggttgggccttcaacatcaacgagtcggccacactaaccccggacgcagacactgggcttatcccattccgccctgcctacctgtccatccttggtggtcagtacgttaaccgtggtgggtgggtgtacgataagtccacagggacagacaccttctctgggccaatcaatgtgaccctgattacccttcaggattacgacgagatgcctgagtgtttccgccagtgg…	MNMQDAYFGSAAELDAVNEMLAAIGESPVTTLDEDGNADVANARRILNRINRQIQSKGWAFNINESATLTPDADTGLIPFRPAYLSILGGQYVNRGGWVYDKSTGTDTFSGPINVTLITLQDYDEMPECFRQWIVTKASRQFNSRFFGAEDVENSLAQEEMEARMACNEYEMDFGQYNMIDGDSFVGGIIGR
Kp84S	fig|6666666.1391373.peg.42	peg	Kp84S_27460_29850	27460	29850	+	Phage non-contractile tail tubular protein Gp12				atggcactggtaagtcagtcgataaaaaatcttaagggaggcattagccagcagcctgaaatcttacggtacccagagcagggtacacttcaggtcaacggttggtcctccgatactgagggtctccagaagcggccacctatggtgttcatcaagtccattggccctcgtggttacttgggggaagacccatatatccacctcatcaaccgagatgagttcgagcagtattacgctgtgttcacagggaatgatgtaagggtgttcgacctgtccggttatgagtatcaggtcagaggtgaccgctcttatgtgaccgtcaataaccctaaggataacttgcggatggtcacagtggctgactatacgttcatcgtcaacaggaccagacaggtgcgc…	MALVSQSIKNLKGGISQQPEILRYPEQGTLQVNGWSSDTEGLQKRPPMVFIKSIGPRGYLGEDPYIHLINRDEFEQYYAVFTGNDVRVFDLSGYEYQVRGDRSYVTVNNPKDNLRMVTVADYTFIVNRTRQVRESPLQTNGGVFRDNADGIINVRGGQYGRKLEVNINGVWVSHQLPPGDNAKEDPPKVDAQAIAEALAVLLRAAHPTWTFNVGTGYIHCIAPAYTTIDVFETKDGYADQLINPVTHYVQSFSKLPLNAPDGYMVKIVGDTSKTADQYYVKYDKSKKVWKETVGWNVSVGLEYHTMPWTLVRAADGNFDLGYHEWKDRRAGDDDTNPQPSFVDSTITDVFFFRNRLGFISGENIVMSRTSKYFEFYPPSVANYTDDDPLDVAVSHNRVS…
Kp84S	fig|6666666.1391373.peg.43	peg	Kp84S_29923_30336	29923	30336	+	Phage scaffold protein Gp13, required for Gp6.7 incorporation into virion				atgtacataagaaacactgtaagtaatgacttcgagttattcatcccggcctaccatgacgtacttgaggcgcaggccatgggtatagaaccatcgttcccagcggttactgagtgtgtcacgttagaccacgatggttttcctttggctataggtggaaacgttggagactgttgttggcttgtgaccagtgataaggttgagaagttaagccttaaagccaagctcaagttccgtaagctggtgattgagtatcgagaccaaatgctcgaacgatatgagtccttatggaattttgtttatattgaaaatgagccacacattaggttcttaaagtccatcggtgcggagttccaagaggaatacacctgcgatggtaagtttcaactattcatcatt…	MYIRNTVSNDFELFIPAYHDVLEAQAMGIEPSFPAVTECVTLDHDGFPLAIGGNVGDCCWLVTSDKVEKLSLKAKLKFRKLVIEYRDQMLERYESLWNFVYIENEPHIRFLKSIGAEFQEEYTCDGKFQLFIIRRKS
Kp84S	fig|6666666.1391373.peg.44	peg	Kp84S_30333_30518	30333	30518	+	VR7ORF006c hypothetical protein				atgaagtgctgctccaagatttgtggtaaacatgaatcggagcaacgtagggcgctggctgtagaccattgccatacaactggttccgttcgtggtctattgtgtgataactgcaaccgaggcatctggtactttagggataaccatgaggtactcaaggccgctataaagtatctaggaggataa	MKCCSKICGKHESEQRRALAVDHCHTTGSVRGLLCDNCNRGIWYFRDNHEVLKAAIKYLGG
Kp84S	fig|6666666.1391373.peg.45	peg	Kp84S_30523_31113	30523	31113	+	Phage DNA ejectosome component, internal virion protein Gp14				atgtgttgggtagccgcaataccaattgcaatgacggcggtgcaggccatcggtcagtcacgcaatgaagccaagatgattggccttcagaatgaccagatgcgccgacagtctgtccagatgattaaagagtcaaacattcagaacgctaacgccagccttgagcagaagcagaagctggaagaagctagtgcggacttaaccgctaagaatctcgataaggttcaggccatgggtacaatccgtgcagcaatcggagagggaaaccttgagggagccagtatggaccgtatcagtcgaatcgaggagggcaagttcattcgggaggccaacgcggtcaccgataattatcgtcgagattatgcgtcactgttcgctcaacagctaggtaactctgag…	MCWVAAIPIAMTAVQAIGQSRNEAKMIGLQNDQMRRQSVQMIKESNIQNANASLEQKQKLEEASADLTAKNLDKVQAMGTIRAAIGEGNLEGASMDRISRIEEGKFIREANAVTDNYRRDYASLFAQQLGNSESTMDQVKSMQKAEGKGKSKLEQVLDPLAMMGSQAASAYASGAFDSKSTKPPISQAKGTKVGGK
Kp84S	fig|6666666.1391373.peg.46	peg	Kp84S_31113_33368	31113	33368	+	Phage DNA ejectosome component, internal virion protein Gp15				atggctagtaaattagaacaagcgttgggccaactaccacaggccgggtctacccgcatccgtggaggctcggcgtccatgcagtatcgcccagtaaccattcaacaggaaggtgtccggcagtccaacctagtacagtccttggtgaagtttggggcagcgatgggtgaagcagtagatgcttacgacaagcgccagcgcgataaggctgaggagcggtccgatgagattatccgtaagttgaccccagagcagcgccgagaggcaatcaagaacgggacactgctgtatcaggatgacccgtacgctatggaggccctacggttcaagactggccgtaacgctgcgttcctcattgacgacgaagtggcgcagcgcgttcagaacggtgagttccgt…	MASKLEQALGQLPQAGSTRIRGGSASMQYRPVTIQQEGVRQSNLVQSLVKFGAAMGEAVDAYDKRQRDKAEERSDEIIRKLTPEQRREAIKNGTLLYQDDPYAMEALRFKTGRNAAFLIDDEVAQRVQNGEFRTRAEMEEYRHKRLTEGANEFAEQFMINPEDSEFQRGFNANITERNISLYGKHDTFLSEQAQKGAILASKVELSGVLKDPSVLARPESGEFFQRYIDNALKTGSIPSDAQAQQVIIGSLNDVIQRPGATNFLQSLEGRQVTLNGKTTTYKELMGEEQWNALMVKAQSTQFDNDAKLSEGFRLGITSALNQDDTSKGWEMLQGAKAELDRLQPGEQMTPERERLIQAEEQMQARFRQEAQAAAKEMDKRQKTINKNQVIDQQFTKRIS…
Kp84S	fig|6666666.1391373.peg.47	peg	Kp84S_33385_37350	33385	37350	+	Phage DNA ejectosome component Gp16, peptidoglycan lytic exotransglycosylase (EC 4.2.2.n1)				atgagctacgacaagtccagacctagtgactacgacggtatcttccagaaggcagcagactctcacggagttagctatgacctgctgcgtaaactgtccttcaacgaatcatccttcaaccccaaggccgtctctaagactggccctaaaggaatcatgcaattcacccgcaacacggcccgcgctatgggccttaacgtgaccgatggtgacgacgatgatcgttacaacccagagttagccattgatgctggcgctaagctgcttgcgagcctcgttaagaagtacaatggggatgagctgaaagcagccctagcgtacaaccaaggggaaggcccagcgggcgcacctcagcttcaggattacgataagggagacttcgggtctatctcggaggaa…	MSYDKSRPSDYDGIFQKAADSHGVSYDLLRKLSFNESSFNPKAVSKTGPKGIMQFTRNTARAMGLNVTDGDDDDRYNPELAIDAGAKLLASLVKKYNGDELKAALAYNQGEGPAGAPQLQDYDKGDFGSISEEGRNYMRKLLDVAKSPNSGALEAFGGITPKGKGIPAEDAFKGISKAGKVGTELPESHGFDVEGVAQEAPNTPYAKDFWEKTGTTLDEYNSRSTFFGFGDAADAQLQNSTLGVAFRAARADDGYDVFKDTMTPTRWNSYVPSKEDLQKLRDSGLPPSYYGVVTGGDGENWDALIKLAKDNFEADQRAAEAGTGAKLAAGIVGAGVDPLSYVPLVGVAGKGLKVVNKALRVGAQAGALSVASEGIRTSVAGGEAHYADAALGGLLFGAG…
Kp84S	fig|6666666.1391373.peg.48	peg	Kp84S_37413_40466	37413	40466	+	tail fibers protein				atggaccaagatactaaaacaatcatccaataccccaccagtggtgacgaatatgatatcccctttgactacctgtcgcgtaagtttgtccgtgtgtctctcgtatcgaatacccagcgcgtcttactggataacatcacagattaccgttacgtctccagaacgcgcgtcaagctgcttgtaagtaccgatgggtatagccgtgtagagattcgacgcttcacctctgcgtccgagatggtcgtggacttcagcgatgggtccgttctccgcgcgaccgaccttaacgtgtccgctctacagtctgcacacatcgcagaggaggctcgtgacttattcagcacatccctgagcattggccaacttagctactttgacgctaaaggcttgcagataaag…	MDQDTKTIIQYPTSGDEYDIPFDYLSRKFVRVSLVSNTQRVLLDNITDYRYVSRTRVKLLVSTDGYSRVEIRRFTSASEMVVDFSDGSVLRATDLNVSALQSAHIAEEARDLFSTSLSIGQLSYFDAKGLQIKNVAAGVDNTDAVTVQQLNKIIADVVTTIPDSVADNIRGLWARVLGDIGITLVDGSFETGATITTRTQALWSISGRKCYTWAGALPKVVPENSTPESTGGISETAWVDSSSKALGVLLAGPSGAERVGLKQGGTVQDAINWLTFDSFDIVKDGSKDVTADIMAACVVANDLGLDIKQNDGTYLVSGNPVWPVYNSLDLNGVTLKLAAGFTGYFALTQKDSTTVYGPTSPIVQAINAAGGRTAGSGVLEGLVNSTELNGKYLFMEGAD…
